# Supplementary material for: Pathogen clonal expansion underlies multiorgan dissemination and organ-specific outcomes during systemic infection
Source: bioRxiv preprint, doi:10.1101/2021.05.17.444473, version 1 (2021-05-17)
Supplement: Table S1 [file 444473_file23.xlsx]

## Sheet: Livers
locus tag	mean inf sites	mean log10pval	sd log10pval	pval<0.05	mean log2fc	sd log2fc	log2fc<-2	score	rank	gene
C_RS09455	12.7663	-3.67859	0.705465	5	-6.27033	1.93368	5	1	1	mannose-6-phosphate isomerase
C_RS20130	16.2673	-3.79192	0.892039	5	-4.66967	0.864016	5	1	2	cell division protein FtsX
C_RS23265	0.221782	-3.05882	1.06686	5	5.52332	0.586836	5	1	3	DNA-binding transcriptional regulator OxyR
C_RS18750	15.5881	-4.06464	0.710395	5	-4.11793	0.992756	5	1	4.5	phospholipid ABC transporter ATP-binding proteinMlaF
C_RS18745	11.6238	-2.99541	0.679028	5	-4.94931	2.79619	5	1	4.5	lipid asymmetry maintenance ABC transporter permease subunit MlaE
C_RS20135	9.10495	-2.84523	0.351875	5	-6.42962	1.76703	5	1	6	cell division ATP-binding protein FtsE
C_RS03530	15.4733	-3.66155	0.313961	5	-4.3074	1.40659	5	1	7.5	N-acetylglucosamine-6-phosphate deacetylase
C_RS12925	10.7168	-2.94806	0.755285	5	-5.43483	1.93987	5	1	7.5	cardiolipin transport protein PbgA
C_RS18735	14.7188	-3.71164	0.662513	5	-3.93456	0.594197	5	1	9	phospholipid-binding protein MlaC
C_RS22620	9.07129	-2.28736	0.587666	5	-4.59959	1.77056	5	1	10	transcription/translation regulatory transformerprotein RfaH
C_RS19795	7.90891	-2.11693	0.358217	5	-4.58654	0.321282	5	1	11	two-component system response regulator OmpR
C_RS19790	14.6574	-2.83381	0.743644	5	-3.49427	0.663573	5	1	12	two-component system sensor histidine kinase EnvZ
C_RS12120	15.8297	-3.45843	0.949633	5	-3.1714	0.811951	5	1	13	LPS O-antigen chain length determinant protein WzzB
C_RS20950	12.9446	-2.06071	0.473136	5	-2.97745	0.623472	5	1	14	murein hydrolase activator EnvC
C_RS22255	7.90495	-1.6708	0.38981	5	-3.10078	1.06283	5	1	15	ECA oligosaccharide polymerase
C_RS24315	45.9822	-11.7181	3.16333	5	2.43317	0.372491	5	1	16	lysine decarboxylase CadA
C_RS03535	13.0099	-2.31478	0.764988	5	-2.46239	0.215306	5	1	17	glucosamine-6-phosphate deaminase
C_RS22755	0.643564	-2.9851	0.822423	5	3.40065	1.14346	4	0.9	18	nitrogen regulation protein NR(I)
C_RS00910	11.7941	-2.85734	0.925518	5	-3.40916	1.67454	4	0.9	19	serine endoprotease DegP
C_RS03360	13	-2.06728	0.450086	5	-3.60933	1.20429	4	0.9	20	D-alanyl-D-alanine carboxypeptidase DacA
C_RS20165	3.71287	-6.27706	1.6017	5	2.90915	0.879497	4	0.9	21	Zn(II)/Cd(II)/Pb(II) translocating P-type ATPaseZntA
C_RS07590	8.62178	-1.4723	0.334463	4	-3.18933	0.925723	5	0.9	22	septum site-determining protein MinD
C_RS22205	18.5584	-2.39338	0.64907	5	-2.31288	0.620644	4	0.9	23	UDP-N-acetylglucosamine--undecaprenyl-phosphate N-acetylglucosaminephosphotransferase
C_RS18740	16.1881	-3.16781	1.30802	5	-3.02951	1.5594	3	0.8	24	outer membrane lipid asymmetry maintenance protein MlaD
C_RS18900	5.42376	-1.39805	0.520053	3	-4.12995	2.10504	5	0.8	25	DUF1043 family protein
C_RS03155	0.469307	-1.50326	0.432727	3	3.35502	0.673987	5	0.8	26	Fe(3+)-siderophore ABC transporter permease
C_RS14920	9.11089	-1.92933	0.515339	4	-2.7671	2.2825	4	0.8	27	outer membrane protein assembly factor BamE
C_RS13545	29.7822	-5.05725	0.902135	5	-2.34779	0.763912	3	0.8	28	amidophosphoribosyltransferase
C_RS13710	19.7347	-3.85708	0.337114	5	-2.18831	0.395185	3	0.8	29	phospholipid-binding lipoprotein MlaA
C_RS13075	23.8356	-2.97881	0.573796	5	-2.19229	0.541959	3	0.8	30	porin OmpC
C_RS25105	24.9307	-2.84881	0.863684	5	-2.00272	0.489788	3	0.8	31	HlyC/CorC family transporter
C_RS18770	3.24356	-1.24689	0.250524	2	-6.20019	0.325045	5	0.7	32	LPS export ABC transporter periplasmic protein LptC
C_RS23815	8.04356	-1.25221	0.708331	2	-3.98564	2.15054	5	0.7	33	alanine racemase
C_RS02435	0.164356	-1.28768	0.851799	3	3.46663	1.14025	4	0.7	34	thiamine-phosphate kinase
C_RS14695	7.95842	-1.6903	0.828867	4	-2.31629	2.5629	3	0.7	35	anti-sigma-E factor RseA
C_RS22385	3.5604	-2.61834	0.4962	5	2.01861	0.302466	2	0.7	36	magnesium/cobalt transporter CorA
C_RS13555	12.0574	-1.756	0.475494	5	-2.09587	0.913465	2	0.7	37	cell division protein DedD
C_RS12140	15.6614	-2.03297	0.435486	5	-1.93725	0.758857	2	0.7	38	mannose-1-phosphate guanyltransferase
C_RS22990	7.37624	-1.40323	0.369532	2	-3.23163	1.21214	4	0.6	39	envelope stress response regulator transcriptionfactor CpxR
C_RS18730	4.09505	-1.11611	0.314441	2	-4.31098	2.74165	4	0.6	40	lipid asymmetry maintenance protein MlaB
C_RS24325	28.5842	-5.27874	1.29691	5	1.88878	0.408388	1	0.6	41	lysine decarboxylation/transport transcriptionalactivator CadC
C_RS25165	14.6139	-1.92877	0.91678	4	-1.99603	0.605544	2	0.6	42	class 1 fructose-bisphosphatase
C_RS12170	6.55446	-1.04063	0.421502	2	-2.98727	1.59199	4	0.6	43	O6 family O-antigen polymerase
C_RS22985	14.8198	-1.63225	0.472811	4	-1.75036	1.06179	2	0.6	44	envelope stress sensor histidine kinase CpxA
C_RS12290	19.2911	-2.22385	0.790568	4	-1.59048	1.0215	2	0.6	45	outer membrane assembly protein AsmA
C_RS14270	9.4495	-1.34935	0.645688	3	-1.69739	0.816519	3	0.6	46	phosphoribosylaminoimidazolesuccinocarboxamide synthase
C_RS07040	20.3485	-2.40815	0.584842	5	-1.49271	0.67886	1	0.6	47	two-component system response regulator PhoP
C_RS06585	4.55248	-0.877104	0.432216	2	-3.15892	2.0763	4	0.6	48	hypothetical protein
C_RS14805	47.7802	-4.03911	1.15989	5	-1.07581	0.589867	1	0.6	49	ATP-dependent chaperone ClpB
C_RS20990	6.91089	-1.21439	0.735688	2	-3.73992	2.11432	3	0.5	50	O-antigen ligase family protein
C_RS22610	9.88119	-1.52619	1.27458	2	-2.68574	1.41712	3	0.5	51	Sec-independent protein translocase subunit TatC
C_RS14690	15.6119	-2.03875	1.07738	4	-2.09757	0.822306	1	0.5	52	sigma-E factor regulatory protein RseB
C_RS25100	6.12475	-1.00793	0.533894	2	-2.847	1.74786	3	0.5	53	DUF1107 domain-containing protein
C_RS23470	5.31089	-1.00996	0.30321	1	-2.61667	0.882123	4	0.5	54	DNA-binding protein HU-alpha
C_RS02550	6.89703	-1.05194	0.802436	1	-2.38809	1.69411	4	0.5	55	endopeptidase La
C_RS04935	29.1485	-2.35003	0.406076	5	-1.59971	0.232661	0	0.5	56	3-phosphoshikimate 1-carboxyvinyltransferase
C_RS17515	15.2495	-1.16804	0.490236	2	-1.77703	1.01746	3	0.5	57	CDP-glycerol glycerophosphotransferase family protein
C_RS09790	2.71881	-0.805907	0.262884	0	-4.0186	1.72901	5	0.5	58	murein lipoprotein Lpp
C_RS17480	16.5743	-1.44392	0.451905	4	-1.45386	0.839785	1	0.5	59	capsule polysaccharide export inner-membrane protein KpsE
C_RS17500	22.9941	-2.41365	0.640016	5	-1.31246	0.328896	0	0.5	60	capsular biosynthesis protein
C_RS24320	26.295	-3.22726	0.739822	5	1.28511	0.176333	0	0.5	61	cadaverine/lysine antiporter
C_RS21025	1.63168	-0.747246	0.0586859	0	-4.56972	0.197339	5	0.5	62	glycosyltransferase family 4 protein
C_RS21010	1.92475	-0.743101	0.225251	0	-4.38343	0.893606	5	0.5	63	LPS 1,2-glucosyltransferase
C_RS07800	3.18812	-0.751522	0.38811	1	-3.19596	2.63653	4	0.5	64	peptide chain release factor N(5)-glutamine methyltransferase
C_RS14340	43.0238	-2.28497	0.833663	5	-1.01373	0.339216	0	0.5	65	polyphosphate kinase 1
C_RS17485	28.996	-1.95363	0.675598	5	-1.00662	0.334663	0	0.5	66	polysaccharide biosynthesis/export family protein
C_RS08150	3.61386	-0.715631	0.463646	1	-3.02773	2.32195	4	0.5	67	type I DNA topoisomerase
C_RS03795	1.68317	-0.689862	0.177428	0	-4.04554	1.16092	5	0.5	68	ADP-forming succinate--CoA ligase subunit beta
C_RS23270	1.17822	-0.648289	0.0509081	0	-4.00754	0.205999	5	0.5	69	Si-specific NAD(P)(+) transhydrogenase
C_RS00190	44.1921	-2.46871	0.635096	5	-0.722009	0.407982	0	0.5	70	carbamoyl-phosphate synthase large subunit
C_RS00850	41.2356	-1.95049	0.584127	5	-0.706224	0.381826	0	0.5	71	bifunctional glycosyl transferase/transpeptidase
C_RS20055	7.19208	-1.05059	0.522694	2	-2.86571	2.36778	2	0.4	72	glycerophosphodiester phosphodiesterase
C_RS05035	8.81188	-1.18829	0.650013	1	-2.10313	1.29676	3	0.4	73	aspartate transaminase
C_RS14090	4.73069	-0.905698	0.610792	2	-3.14625	2.40317	2	0.4	74	DUF2919 domain-containing protein
C_RS07035	31.1208	-2.06037	0.390809	5	-0.609739	0.420944	0	0.5	75	two-component system sensor histidine kinase PhoQ
C_RS23650	13.5465	-1.31416	0.613119	2	-1.72103	0.72638	2	0.4	76	glucose-6-phosphate isomerase
C_RS03450	2.73069	-0.831912	0.174417	0	-3.36247	1.498	4	0.4	77	apolipoprotein N-acyltransferase
C_RS14380	1.03168	-0.532404	0.0248542	0	-3.93337	0.144447	5	0.5	78	IMP dehydrogenase
C_RS21020	1.08713	-0.532092	0.160461	0	-3.91287	0.305396	5	0.5	79	lipopolysaccharide core heptose(I) kinase RfaP
C_RS06220	1.89901	-0.530026	0.186895	0	-4.06096	0.907886	5	0.5	80	DUF2770 family protein
C_RS17535	12.6495	-1.18988	0.435784	2	-1.45836	0.952668	2	0.4	81	ABC transporter permease
C_RS18595	9.73861	-2.20501	1.24329	4	1.22449	0.565828	0	0.4	82	polyribonucleotide nucleotidyltransferase
C_RS00990	0.976238	-0.522507	0.0237093	0	-3.93936	0.284705	5	0.5	83	molecular chaperone Skp
C_RS11445	1	-0.517058	0.0337104	0	-3.92583	0.261541	5	0.5	84	hypothetical protein
C_RS09680	11.1347	-1.16706	0.550727	2	-1.25545	1.67718	2	0.4	85	superoxide dismutase [Fe]
C_RS21835	2.2198	-1.52955	0.650254	3	1.10926	0.888676	1	0.4	86	tRNA uridine-5-carboxymethylaminomethyl(34) synthesis GTPase MnmE
C_RS17495	27.9881	-1.79193	0.450313	4	-0.979827	0.205269	0	0.4	87	capsular polysaccharide biosynthesis protein
C_RS21015	1.36238	-0.497806	0.259908	0	-4.03231	0.756835	5	0.5	88	lipopolysaccharide 3-alpha-galactosyltransferase
C_RS09515	4.66733	-0.750285	0.539819	1	-2.23685	2.60505	3	0.4	89	division septum protein Blr
C_RS14450	35.9208	-1.51037	0.188851	5	-0.482508	0.283292	0	0.5	90	peptidoglycan glycosyltransferase PbpC
C_RS07660	17.2297	-1.28655	0.884165	3	-0.989404	0.768225	1	0.4	91	D-amino acid dehydrogenase
C_RS22005	4.6495	-2.35155	0.252467	5	0.463007	0.663091	0	0.5	92	tRNA uridine(34) 5-carboxymethylaminomethyl synthesis enzyme MnmG
C_RS24705	15.4891	-0.958598	0.702141	2	-1.1524	1.42319	2	0.4	93	YjeJ family protein
C_RS04520	2.84158	-0.672325	0.383243	0	-3.14697	2.95808	4	0.4	94	tail protein X
C_RS29645	1.59208	-0.647126	0.230435	0	-4.18158	1.26025	4	0.4	95	hypothetical protein
C_RS11715	4.7802	-0.682172	0.561185	1	-2.60166	2.47452	3	0.4	96	colibactin biosynthesis phosphopantetheinyl transferase ClbA
C_RS20995	3.48515	-0.651604	0.243126	0	-3.87326	1.72737	4	0.4	97	glycosyltransferase family 2 protein
C_RS24825	30.099	-1.63472	0.259898	4	-0.852292	0.287588	0	0.4	98	N-acetylmuramoyl-L-alanine amidase AmiB
C_RS12345	43.996	-1.8484	0.885476	4	-0.840585	0.261112	0	0.4	99	multidrug efflux RND transporter permease subunit MdtC
C_RS13420	2.20792	-0.639056	0.338859	0	-3.69128	1.70502	4	0.4	100	NADH-quinone oxidoreductase subunit NuoB
C_RS19690	3.10693	-0.637885	0.207798	0	-3.61328	1.61136	4	0.4	101	adenine-specific DNA-methyltransferase
C_RS03285	3.45941	-0.738031	0.185399	0	-1.6936	1.87677	4	0.4	102	citrate lyase acyl carrier protein
C_RS03770	3.87723	-0.635757	0.422284	1	-2.89189	1.66362	3	0.4	103	succinate dehydrogenase flavoprotein subunit
C_RS25890	38.3861	-2.04523	0.738089	5	-0.413543	0.444628	0	0.5	104	murein transglycosylase
C_RS07220	2.3604	-0.622268	0.178135	0	-3.069	1.23227	4	0.4	105	DUF1828 domain-containing protein
C_RS01465	4.11683	-0.637388	0.255914	0	-2.42737	0.762396	4	0.4	106	RpiB/LacA/LacB family sugar-phosphate isomerase
C_RS15895	38.5901	-1.92234	0.940773	4	-0.723924	0.624146	0	0.4	107	GTP pyrophosphokinase
C_RS06980	2.03564	-0.60493	0.328912	0	-3.82372	1.57516	4	0.4	108	DUF4222 domain-containing protein
C_RS08160	3.87525	-0.643399	0.30908	0	-2.04329	0.995058	4	0.4	109	YmiA family putative membrane protein
C_RS13405	2.18218	-0.598182	0.390507	0	-3.17427	2.30425	4	0.4	110	NADH-quinone oxidoreductase subunit NuoF
C_RS14415	1.39604	-0.581593	0.223806	0	-3.23434	2.07673	4	0.4	111	outer membrane protein assembly factor BamB
C_RS00830	5.94059	-1.04299	0.544189	1	-2.64947	2.65717	2	0.3	112	RNA polymerase-binding protein DksA
C_RS14435	7.31485	-1.104	0.310703	1	-2.22605	1.30966	2	0.3	113	cytoskeleton protein RodZ
C_RS03455	9.87327	-1.12645	0.855126	2	-2.02116	1.90376	1	0.3	114	CNNM family magnesium/cobalt transport protein CorC
C_RS07675	11.0752	-1.29324	0.215672	2	-1.86184	0.282025	1	0.3	115	muramoyltetrapeptide carboxypeptidase
C_RS12165	1.57426	-0.555604	0.270555	0	-3.17194	2.02239	4	0.4	116	glycosyltransferase family 2 protein
C_RS09605	9.46139	-1.38674	0.686853	2	-1.57758	1.29563	1	0.3	117	outer membrane lipoprotein SlyB
C_RS12175	1.41782	-0.543125	0.244013	0	-3.74449	1.35224	4	0.4	118	O6 family O-antigen flippase
C_RS24765	2.47327	-1.92278	0.516601	4	0.569717	0.46285	0	0.4	119	elongation factor P--(R)-beta-lysine ligase
C_RS15370	11.1188	-1.10917	0.43636	1	-1.48798	1.34728	2	0.3	120	L-valine exporter subunit YgaZ
C_RS23500	19.7109	-1.41182	0.605454	3	-1.26264	0.378786	0	0.3	121	bifunctional phosphoribosylaminoimidazolecarboxamide formyltransferase/IMP cyclohydrolase
C_RS09695	6.88515	-1.27889	0.846337	2	1.2896	0.621494	1	0.3	122	HTH-type transcriptional repressor PurR
C_RS23090	5.13069	-0.850161	0.354384	1	-2.15891	1.19986	2	0.3	123	cell division protein FtsN
C_RS22765	0.99802	-1.13633	0.689556	2	1.3468	1.60182	1	0.3	124	glutamate--ammonia ligase
C_RS08215	11.4059	-1.13481	0.475287	2	-1.32832	0.914074	1	0.3	125	DeoR/GlpR transcriptional regulator
C_RS01050	6.14851	-0.76352	0.697369	2	-0.740727	1.64066	2	0.4	126	YaeP family protein
C_RS28180	1.18614	-0.519679	0.197892	0	-3.3917	1.58396	4	0.4	127	hypothetical protein
C_RS06405	16.004	-1.3589	0.902488	2	-1.18353	1.2056	1	0.3	128	beta-ketoacyl-ACP synthase II
C_RS00285	10.9683	-1.04605	0.607294	2	-1.33332	1.22384	1	0.3	129	bis(5'-nucleosyl)-tetraphosphatase (symmetrical)ApaH
C_RS09955	6.7604	-0.834041	0.623381	1	-1.91092	2.74287	2	0.3	130	C40 family peptidase
C_RS14810	18.2851	-1.27708	0.527175	3	-1.15191	0.466931	0	0.3	131	polyphenol oxidase
C_RS00350	23.6376	-1.58412	0.658892	4	-0.510443	0.854535	0	0.4	132	ribulokinase
C_RS09870	5.80792	-0.789873	0.283809	0	-2.21607	0.951992	3	0.3	133	type I 3-dehydroquinate dehydratase
C_RS16305	23.6594	-1.54192	0.790122	3	-1.05953	0.307515	0	0.3	134	diaminopimelate decarboxylase
C_RS04930	16.2713	-1.06124	0.444562	3	-1.20963	0.250151	0	0.3	135	3-phosphoserine/phosphohydroxythreonine transaminase
C_RS10035	6.51089	-0.903261	0.446933	1	-1.48383	1.18445	2	0.3	136	type V toxin-antitoxin system endoribonuclease antitoxin GhoS
C_RS05150	8.17624	-0.813862	0.351314	1	-1.82805	1.37818	2	0.3	137	porin OmpA
C_RS08010	2.59604	-0.507703	0.120124	0	-2.97584	1.49976	4	0.4	138	YciU family protein
C_RS12145	4.84554	-0.762018	0.614451	1	-2.17093	2.51619	2	0.3	139	glycosyltransferase
C_RS00540	1.90891	-0.392703	0.12772	0	-3.11591	0.83083	5	0.5	140	preprotein translocase subunit SecA
C_RS09760	7.51881	-0.834595	0.636649	1	-1.55317	1.65706	2	0.3	141	4Fe-4S dicluster domain-containing protein
C_RS06380	9.58416	-0.817675	0.562677	1	-1.50114	0.941185	2	0.3	142	phosphate acyltransferase PlsX
C_RS01420	3.21782	-0.702092	0.307035	0	-2.55122	1.7897	3	0.3	143	AlpA family transcriptional regulator
C_RS03605	3.73069	-0.677237	0.375074	0	-3.20857	2.53001	3	0.3	144	hypothetical protein
C_RS21000	4.89307	-0.705078	0.335678	0	-2.44356	1.16568	3	0.3	145.5	UDP-galactose--(galactosyl) LPS alpha1,2-galactosyltransferase
C_RS18910	3.50297	-0.693397	0.560865	1	-2.64488	2.81454	2	0.3	145.5	outer membrane-stress sensor serine endopeptidase DegS
C_RS10040	15.7228	-1.16996	0.55164	2	-0.964583	0.921311	1	0.3	147	fructosamine kinase family protein
C_RS11035	1.11881	-0.488431	0.125447	0	-3.10475	1.67407	4	0.4	148	DUF2594 family protein
C_RS18295	5.81584	-0.762478	0.213363	0	-1.64703	2.06375	3	0.3	149	DedA family protein
C_RS07405	7.70495	-0.835758	0.375318	1	-1.20553	0.941581	2	0.3	150	phage tail protein
C_RS10745	2.32079	-0.641637	0.395356	0	-3.30108	2.11075	3	0.3	151	lauroyl-Kdo(2)-lipid IV(A) myristoyltransferase
C_RS03860	0.964356	-0.471178	0.143859	0	-3.36278	1.15121	4	0.4	152	peptidoglycan-associated lipoprotein Pal
C_RS09270	3.48713	-0.676264	0.426276	0	-2.24405	2.4221	3	0.3	153	putative selenium delivery protein YdfZ
C_RS14600	8.45149	-0.848532	0.42475	1	-1.14685	1.22698	2	0.3	154	two-component system QseEF-associated lipoprotein QseG
C_RS01480	2.22574	-0.485273	0.081855	0	-2.37787	2.37714	4	0.4	155	cupin domain-containing protein
C_RS06505	36.9485	-1.57768	0.888234	3	-0.791072	0.552199	0	0.3	156	transcription-repair coupling factor
C_RS04550	3.80594	-0.68108	0.325737	0	-1.9777	0.840279	3	0.3	157	phage virion morphogenesis protein
C_RS00230	38.6653	-1.86398	0.444446	4	-0.414953	0.360953	0	0.4	158	L-carnitine/gamma-butyrobetaine antiport BCCT transporter
C_RS18915	2.46139	-0.46789	0.141995	0	-2.67028	1.22159	4	0.4	159	malate dehydrogenase
C_RS17490	13.0574	-1.04027	0.771194	2	-0.853463	0.825939	1	0.3	160	3-deoxy-manno-octulosonate cytidylyltransferase
C_RS17845	23.1426	-1.52973	0.698066	3	-0.741312	0.507226	0	0.3	161	cell division protein FtsP
C_RS12360	10.9525	-1.02598	0.721597	2	-0.835019	0.996437	1	0.3	162	two-component system response regulator BaeR
C_RS14180	6.38614	-0.760617	0.58047	1	-1.18141	1.89699	2	0.3	163	ethanolamine utilization acetate kinase EutQ
C_RS18945	4.53861	-0.634312	0.42172	1	-2.10735	1.61115	2	0.3	164	AaeX family protein
C_RS02460	1.17228	-0.456635	0.189133	0	-2.59828	2.30228	4	0.4	165	exodeoxyribonuclease VII small subunit
C_RS17905	5.4396	-0.63553	0.54701	1	-1.84485	1.49765	2	0.3	166	antibiotic biosynthesis monooxygenase
C_RS02405	25.0297	-1.38555	0.444187	3	-0.676607	0.357059	0	0.3	167	nucleoside-specific channel-forming protein Tsx
C_RS03800	1.12871	-0.439751	0.192465	0	-3.41754	1.38391	4	0.4	168	succinate--CoA ligase subunit alpha
C_RS02440	4.61584	-0.623716	0.318223	0	-1.90906	1.25754	3	0.3	169	phosphatidylglycerophosphatase A
C_RS17835	1.53861	-0.437313	0.205583	0	-3.30202	1.55492	4	0.4	170	TRAP transporter small permease
C_RS09215	2.00396	-0.574367	0.25116	0	-3.24539	1.95977	3	0.3	171	PTS sugar transporter subunit IIB
C_RS00410	23.404	-1.12528	0.611252	3	-0.68933	0.617009	0	0.3	172	3-isopropylmalate dehydratase large subunit
C_RS14870	1.00198	-0.347737	0.16525	0	-3.62507	0.758873	5	0.5	173	50S ribosomal protein L19
C_RS15715	27.4436	-1.45989	0.816657	3	-0.625654	0.746527	0	0.3	174.5	murein hydrolase activator NlpD
C_RS25725	19.4099	-1.3652	0.924282	3	-0.631408	0.824441	0	0.3	174.5	DNA-binding transcriptional activator BglJ
C_RS22605	3.80792	-0.581477	0.251871	0	-2.3086	0.92997	3	0.3	176	Sec-independent protein translocase subunit TatB
C_RS14610	55.7545	-1.90132	1.1979	3	-0.609517	0.639089	0	0.3	177	phosphoribosylformylglycinamidine synthase
C_RS20545	4.12079	-0.574768	0.222804	0	-2.21113	1.04071	3	0.3	178	YhjR family protein
C_RS02540	2.06337	-0.426528	0.119219	0	-2.70149	1.289	4	0.4	179	ATP-dependent Clp endopeptidase proteolytic subunit ClpP
C_RS13385	1.3505	-0.417792	0.203059	0	-3.47271	1.14249	4	0.4	180	NADH-quinone oxidoreductase subunit J
C_RS18870	10.8396	-0.977958	0.75356	2	-0.652458	1.22293	1	0.3	181	transcriptional regulator NanR
C_RS00305	1.25149	-0.416697	0.232782	0	-3.02275	2.39924	4	0.4	182	peptidylprolyl isomerase SurA
C_RS08290	3.31287	-0.547722	0.34271	0	-2.55157	2.07089	3	0.3	183	peptide ABC transporter permease SapB
C_RS03330	6.42574	-0.989642	0.299558	0	-1.69789	0.833649	2	0.2	184	twin-arginine translocase subunit TatE
C_RS13470	1.89505	-0.904931	0.465303	1	-0.653774	2.60347	2	0.3	185	acetate kinase
C_RS20035	0.79802	-0.421936	0.0664885	0	-2.38961	1.87337	4	0.4	186	hypothetical protein
C_RS07950	7.32277	-0.865905	0.284928	0	-2.0985	1.0264	2	0.2	187	two-component system response regulator RssB
C_RS07550	1.95248	-0.524324	0.245264	0	-3.48119	1.73567	3	0.3	188	hypothetical protein
C_RS12155	1.8297	-0.529571	0.251356	0	-2.86005	1.85512	3	0.3	189	glycosyltransferase
C_RS08600	153.21	-2.23928	0.531665	5	-0.154124	0.196749	0	0.5	190	autotransporter domain-containing protein
C_RS04250	10.9366	-1.09963	0.173683	1	-1.35181	0.79193	1	0.2	191	outer membrane protein OmpX
C_RS08555	7.85743	-0.920927	0.425021	1	-1.63839	1.35599	1	0.2	192	universal stress protein UspF
C_RS09290	26.2812	-0.948678	0.500526	1	1.56626	3.62893	1	0.2	193	starvation-sensing protein RspA
C_RS26835	6.98218	-0.890524	0.469002	1	-1.70335	1.26785	1	0.2	194	tyrosine-type recombinase/integrase
C_RS02625	9.08911	-0.910678	0.461356	1	-1.6053	1.84771	1	0.2	195	YbaY family lipoprotein
C_RS18520	11.4851	-0.995847	0.636251	2	-0.582176	0.921745	1	0.3	196	DnaA initiator-associating protein DiaA
C_RS17800	6.94257	-0.832983	0.578273	1	-0.653991	2.07604	2	0.3	197	lipoprotein YqhH
C_RS26205	1.32871	-0.516818	0.208267	0	-2.72128	2.09958	3	0.3	198	transcriptional regulator
C_RS04970	1.61782	-0.405169	0.177683	0	-2.43776	2.14557	4	0.4	199	tetraacyldisaccharide 4'-kinase
C_RS15575	9.54455	-1.11246	0.538231	1	-1.16455	0.991842	1	0.2	200	formate hydrogenlyase assembly protein HycH
C_RS10335	19.2099	-1.07297	0.528639	3	-0.541481	0.389404	0	0.3	201	D-hexose-6-phosphate mutarotase
C_RS18860	27.9525	-1.26507	0.745701	3	-0.516236	0.833469	0	0.3	202	sialic acid transporter NanT
C_RS06970	1.19208	-0.401712	0.157724	0	-2.66454	2.19925	4	0.4	203	hypothetical protein
C_RS24675	10.6079	-0.810904	0.344275	0	-1.86592	0.84402	2	0.2	204	aspartate ammonia-lyase
C_RS07595	7.63168	-0.923124	0.291107	0	-1.3785	1.18317	2	0.2	205	septum site-determining protein MinC
C_RS10770	1	-0.401779	0.217549	0	-2.49152	2.21286	4	0.4	206	Holliday junction branch migration DNA helicase RuvB
C_RS02715	1.09307	-0.400305	0.190538	0	-2.53688	2.05893	4	0.4	207	YbaB/EbfC family nucleoid-associated protein
C_RS08735	2.03366	-0.500549	0.354055	0	-3.45915	3.3383	3	0.3	208	DUF2554 family protein
C_RS12595	28.4079	-1.53518	0.499683	3	-0.4786	0.78866	0	0.3	209	two-component regulatory system sensor histidinekinase BtsS
C_RS18525	13.6554	-1.18123	0.762904	1	-1.022	0.8568	1	0.2	210	divisome-associated lipoprotein YraP
C_RS17260	4.81188	-0.519372	0.230989	0	-2.09772	2.06027	3	0.3	211	N-acetylneuraminic acid channel protein
C_RS16185	17.7683	-1.07898	0.616448	2	-1.08581	0.735884	0	0.2	212	N-acetylmuramoyl-L-alanine amidase AmiC
C_RS19145	11.6455	-1.05793	0.466003	1	-1.09046	0.978551	1	0.2	213	amino acid ABC transporter ATP-binding protein
C_RS04240	8.31089	-0.908347	0.544787	1	-1.22885	1.31444	1	0.2	214	DNA starvation/stationary phase protection protein Dps
C_RS09710	24.0812	-1.24672	0.459093	2	-0.97167	0.36864	0	0.2	215	cyclopropane fatty acyl phospholipid synthase
C_RS13550	6.0198	-0.828834	0.609605	1	-1.44714	1.68277	1	0.2	216	colicin V production protein
C_RS03670	33.305	-1.47952	0.490105	3	-0.464761	0.283022	0	0.3	217	two-component system sensor histidine kinase KdbD
C_RS04815	24.4594	-1.34974	0.528821	3	-0.469563	0.70061	0	0.3	218	ATP-dependent Clp protease ATP-binding subunit ClpA
C_RS11410	5.9505	-0.741619	0.33188	0	-1.94851	1.44884	2	0.2	219	replication/maintenance protein RepL
C_RS00185	17.8337	-1.20967	0.539832	2	-0.943786	0.446537	0	0.2	220	glutamine-hydrolyzing carbamoyl-phosphate synthase small subunit
C_RS10395	5.66931	-0.839622	0.371914	0	-1.35171	0.691027	2	0.2	221	DUF488 domain-containing protein
C_RS18480	11.6851	-0.920955	0.374929	1	-1.14618	0.923108	1	0.2	222	tagatose-bisphosphate aldolase subunit KbaY
C_RS19700	12.3406	-0.84961	0.520688	1	-1.31063	0.878646	1	0.2	223	3-dehydroquinate synthase
C_RS14390	190.788	-2.13759	0.542707	5	-0.113869	0.0829249	0	0.5	224	hypothetical protein
C_RS09610	7.69109	-0.870035	0.485758	1	-1.21178	1.02882	1	0.2	225	transcriptional regulator SlyA
C_RS27390	2.35446	-0.498329	0.311242	0	-2.45387	2.54425	3	0.3	226	hypothetical protein
C_RS14975	5.26931	-0.864283	0.592649	1	-1.22968	2.29758	1	0.2	227	hypothetical protein
C_RS06170	22.2356	-1.33948	0.255834	2	-0.893319	0.390641	0	0.2	228	glucans biosynthesis protein MdoG
C_RS01035	7.69505	-0.847578	0.479917	1	-1.25445	0.840571	1	0.2	229	VOC family protein
C_RS16535	3.56238	-0.662798	0.538221	0	-2.97286	2.98754	2	0.2	230	ASCH domain-containing protein
C_RS25550	9.16238	-0.793096	0.414768	1	-1.41128	1.15507	1	0.2	231	hypothetical protein
C_RS12620	15.8931	-1.10733	0.594042	2	-0.922401	0.967409	0	0.2	232	glycine betaine ABC transporter permease YehY
C_RS09055	1.18416	-0.38154	0.186668	0	-2.91876	2.1585	4	0.4	233	two-component system connector SafA
C_RS18690	1.44158	-0.376705	0.157607	0	-3.54321	2.06752	4	0.4	234.5	Obg family GTPase CgtA
C_RS03375	1.61386	-0.376049	0.18888	0	-3.76442	1.74471	4	0.4	234.5	peptidoglycan DD-transpeptidase MrdA
C_RS18960	60.0436	-1.45308	0.585486	3	-0.442926	0.312305	0	0.3	236	AsmA2 domain-containing protein YhdP
C_RS11740	23.0614	-1.10916	0.846711	1	-0.899504	0.828621	1	0.2	237	nicotinate-nucleotide--dimethylbenzimidazole phosphoribosyltransferase
C_RS19930	3.50099	-0.698321	0.369366	0	-1.99271	2.40131	2	0.2	238	type 1 fimbrial protein
C_RS11705	205.481	-2.68757	0.646885	5	-0.0991449	0.218829	0	0.5	239	colibactin hybrid non-ribosomal peptide synthetase/type I polyketide synthase ClbB
C_RS22710	0.780198	-0.602427	0.252715	0	-0.865441	2.4235	3	0.3	240	thiol:disulfide interchange protein DsbA
C_RS29760	2.25545	-0.465577	0.30935	0	-2.98133	2.40877	3	0.3	241	hypothetical protein
C_RS12255	15.2337	-0.92416	0.628212	1	-0.947977	0.741259	1	0.2	242	colanic acid biosynthesis glycosyltransferase WcaC
C_RS04810	8.86733	-0.817057	0.538478	1	-1.12075	0.780098	1	0.2	243	ATP-dependent Clp protease adapter ClpS
C_RS02945	3.61782	-0.506117	0.136385	0	-1.58431	1.82745	3	0.3	244	5-(carboxyamino)imidazole ribonucleotide mutase
C_RS16145	5.77822	-0.707191	0.163999	0	-1.61405	0.962382	2	0.2	245	type VI secretion system lipoprotein TssJ
C_RS07030	6.02376	-0.683271	0.59215	1	-1.75736	2.32372	1	0.2	246	hypothetical protein
C_RS00095	10.2752	-0.749208	0.31164	0	-1.32397	1.57978	2	0.2	247	hypothetical protein
C_RS05070	15.1465	-0.963795	0.517749	1	-0.88424	0.900429	1	0.2	248	aliphatic sulfonate ABC transporter permease SsuC
C_RS07445	55.9545	-1.13714	0.449258	3	-0.42575	0.265793	0	0.3	249	host specificity protein J
C_RS14250	4.01188	-0.674616	0.442599	0	-1.85678	2.34475	2	0.2	250	YpfN family protein
C_RS03760	0.70297	-0.377293	0.116532	0	-2.3079	2.33402	4	0.4	251	succinate dehydrogenase cytochrome b556 subunit
C_RS10605	5.45941	-0.658456	0.325197	0	-1.96349	1.87261	2	0.2	252	RNA chaperone ProQ
C_RS20955	21.9881	-1.04878	0.452626	2	-0.819254	0.543219	0	0.2	253	divergent polysaccharide deacetylase family protein
C_RS03445	41.8198	-1.06353	0.691528	3	-0.434036	0.561979	0	0.3	254	rhomboid family intramembrane serine protease
C_RS10750	22.4178	-1.10124	0.38914	2	-0.790153	0.489799	0	0.2	255	murein DD-endopeptidase MepM
C_RS11770	8.10495	-0.652388	0.557583	1	-0.659427	1.6499	2	0.3	256	ParB N-terminal domain-containing protein
C_RS11660	119.962	-2.3602	1.19	4	-0.219987	0.263355	0	0.4	257	colibactin hybrid non-ribosomal peptide synthetase/type I polyketide synthase ClbK
C_RS15415	11.697	-0.803227	0.677819	1	-1.05603	1.0332	1	0.2	258	DedA family protein
C_RS18655	0.79802	-0.279389	0.0659853	0	-3.55436	0.316204	5	0.5	259	phosphoglucosamine mutase
C_RS00670	0.312871	-0.749579	0.436139	1	0.537843	1.90204	2	0.3	260	pyruvate dehydrogenase (acetyl-transferring), homodimeric type
C_RS17125	5.66139	-0.700675	0.353392	0	-1.41579	1.3446	2	0.2	261	hypothetical protein
C_RS24815	23.1267	-1.09511	0.377623	2	-0.752299	0.326397	0	0.2	262	bifunctional ADP-dependent NAD(P)H-hydrate dehydratase/NAD(P)H-hydrate epimerase
C_RS29785	4.89901	-0.688532	0.599347	1	-1.47884	2.79451	1	0.2	263	hypothetical protein
C_RS19905	10.7604	-0.898464	0.412532	1	-0.880109	1.76415	1	0.2	264	hypothetical protein
C_RS07735	7.84356	-0.729934	0.383158	1	-1.23096	0.874261	1	0.2	265	dihydroxyacetone kinase ADP-binding subunit DhaL
C_RS25800	15.9624	-1.20416	0.614901	3	-0.401187	0.465709	0	0.3	266	metal-dependent hydrolase
C_RS21030	11.2079	-0.687899	0.384885	0	-1.46265	1.16244	2	0.2	267	lipopolysaccharide core heptosyltransferase RfaQ
C_RS08275	1.47723	-0.467037	0.184465	0	-2.03111	1.92076	3	0.3	268	peptide ABC transporter ATP-binding protein SapF
C_RS01185	5.89901	-0.648275	0.462327	1	-1.75705	2.48869	1	0.2	269	ribonuclease HI
C_RS08650	17.4713	-0.95722	0.503558	2	-0.804809	0.480857	0	0.2	270	type I glyceraldehyde-3-phosphate dehydrogenase
C_RS13630	9.96832	-0.708732	0.547086	1	-1.29159	0.960614	1	0.2	271	chorismate synthase
C_RS10195	6.14653	-0.79467	0.473665	1	-0.989157	0.988952	1	0.2	272	ATP-binding cassette domain-containing protein
C_RS25730	18.8218	-1.00097	0.74791	1	-0.76437	0.798945	1	0.2	273	siderophore-iron reductase FhuF
C_RS14950	1.88515	-0.44773	0.183239	0	-2.73983	1.90109	3	0.3	274	cold shock protein YdfK
C_RS10485	1.39802	-0.352059	0.11274	0	-3.9935	1.88809	4	0.4	275	YoaH family protein
C_RS11915	17.1861	-1.09486	0.560785	2	-0.706777	0.465515	0	0.2	276	IS21-like element IS100 family transposase
C_RS20520	57.1723	-1.3087	0.49114	3	-0.377737	0.29873	0	0.3	277	cellulose biosynthesis protein BcsC
C_RS04860	1.85545	-0.444259	0.195451	0	-2.67418	1.33315	3	0.3	278	DNA translocase FtsK
C_RS12980	8.1901	-0.706358	0.438849	1	-1.19802	0.899261	1	0.2	279	cytochrome c maturation protein CcmE
C_RS24700	7.7604	-0.971614	0.339745	1	-0.730607	1.11906	1	0.2	280	DUF4156 domain-containing protein
C_RS10520	17.3743	-1.15733	0.6368	2	-0.672502	0.574445	0	0.2	281	PTS mannose transporter subunit IIAB
C_RS25225	1.7604	-0.437544	0.209995	0	-2.89128	1.83339	3	0.3	282	2-iminobutanoate/2-iminopropanoate deaminase
C_RS09165	11.6871	-0.773951	0.55074	1	-0.94733	1.18151	1	0.2	283	LysR family transcriptional regulator
C_RS03410	0.524752	-0.266862	0.0420673	0	-2.7929	0.385035	5	0.5	284	leucine--tRNA ligase
C_RS09200	15.804	-0.868423	1.04799	1	-0.779344	1.45034	1	0.2	285	carbohydrate porin
C_RS25690	37.095	-1.20555	0.709905	3	-0.366449	0.607974	0	0.3	286	phosphatidylglycerol--membrane-oligosaccharide glycerophosphotransferase
C_RS11180	15.9941	-1.18456	0.627061	2	-0.651933	0.602676	0	0.2	287	flagellar hook length control protein FliK
C_RS11875	17.0158	-1.11346	0.65086	2	-0.662339	0.488424	0	0.2	288	IS110-like element ISEc20 family transposase
C_RS08415	7.99406	-0.727262	0.43039	1	-1.0309	0.855831	1	0.2	289	thiol peroxidase
C_RS04955	2.63762	-0.438603	0.100233	0	-2.4966	1.42536	3	0.3	290	integration host factor subunit beta
C_RS08595	4.9901	-0.620913	0.471916	1	-1.64727	1.1204	1	0.2	291	YdbL family protein
C_RS20280	28.3762	-1.35335	0.403683	2	-0.630865	0.250683	0	0.2	292	DUF2776 family protein
C_RS19575	51.0139	-1.07613	0.576877	3	-0.371338	0.257965	0	0.3	293	FUSC family protein
C_RS07160	3.46139	-0.568093	0.429892	0	-2.50333	2.598	2	0.2	294	DUF1382 family protein
C_RS11225	3.59802	-0.584341	0.496781	0	-2.06076	2.80322	2	0.2	295	protein DsrB
C_RS07750	1.84356	-0.438561	0.276459	0	-2.2645	3.12972	3	0.3	296	hypothetical protein
C_RS29535	0.475248	-0.374336	0.29405	0	-1.41899	2.50752	4	0.4	297	hypothetical protein
C_RS16520	0.423762	-0.355493	0.0892025	0	-2.10056	0.902783	4	0.4	298	FAD assembly factor SdhE
C_RS07140	9.14653	-0.808175	0.545744	1	-0.810909	1.37039	1	0.2	299.5	ead/Ea22-like family protein
C_RS02040	7.26733	-0.662644	0.299063	0	-1.18686	1.27113	2	0.2	299.5	ankyrin repeat domain-containing protein
C_RS03790	0.867327	-0.238428	0.085642	0	-3.95703	0.739781	5	0.5	301	2-oxoglutarate dehydrogenase complex dihydrolipoyllysine-residue succinyltransferase
C_RS00810	8.90693	-0.732469	0.363346	1	-0.944605	1.12134	1	0.2	302	fimbrial protein
C_RS08925	63.6396	-1.6056	0.701705	3	-0.339358	0.176599	0	0.3	303	nitrate reductase Z subunit alpha
C_RS07175	10.9248	-0.741753	0.589477	1	-0.916446	0.947396	1	0.2	304	phage recombination protein Bet
C_RS28455	1.10891	-0.515589	0.222907	0	-0.898061	2.92682	3	0.3	305	hypothetical protein
C_RS12735	20.4832	-1.10262	0.546059	2	-0.619397	0.726114	0	0.2	306	DUF418 family protein
C_RS15275	9.77822	-0.726798	0.518059	1	-0.918979	1.18424	1	0.2	307	DNA-binding transcriptional regulator CsiR
C_RS10370	9.06733	-0.707589	0.753488	1	-0.952482	2.37751	1	0.2	308	mischarged aminoacyl-tRNA deacylase
C_RS03235	3.89307	-0.606364	0.422676	0	1.48371	0.883334	2	0.2	309	alkyl hydroperoxide reductase subunit C
C_RS12150	1.62772	-0.435265	0.153295	0	-1.9888	2.42323	3	0.3	310	UDP-glucose 4-epimerase GalE
C_RS05980	7.47723	-0.61397	0.376461	0	-1.37472	1.4325	2	0.2	311	GTPase family protein
C_RS12640	20.5188	-1.02965	0.609862	2	-0.622587	0.473844	0	0.2	312	D-alanyl-D-alanine endopeptidase
C_RS01505	1.74851	-0.418987	0.178943	0	-2.64343	1.6827	3	0.3	313	hypothetical protein
C_RS17930	14.7604	-0.89995	0.634561	1	-0.660676	0.982585	1	0.2	314	ABC transporter ATP-binding protein
C_RS13885	6.41782	-0.631841	0.41823	1	-1.17828	1.06504	1	0.2	315	DUF2502 domain-containing protein
C_RS24755	20.695	-0.965071	0.766506	2	-0.62161	0.719763	0	0.2	316	fumarate reductase iron-sulfur protein
C_RS12490	14.901	-0.978193	0.48787	1	-0.615532	0.983634	1	0.2	317	nickel/cobalt efflux protein RcnA
C_RS07665	3.23168	-0.568257	0.31746	0	-1.72981	2.40048	2	0.2	318	catabolic alanine racemase DadX
C_RS08435	28.3228	-1.58259	0.906673	2	-0.54201	0.54749	0	0.2	319	alpha/beta hydrolase
C_RS13185	2.1505	-0.433552	0.246242	0	-1.71817	2.58132	3	0.3	320	ferredoxin-like diferric-tyrosyl radical cofactor maintenance protein YfaE
C_RS14040	10.1149	-1.01188	0.316629	0	-1.51806	0.929694	1	0.1	321	cysteine synthase B
C_RS21140	24.099	-0.907462	0.498627	2	-0.633178	0.679647	0	0.2	322	xanthine/proton symporter XanP
C_RS10760	18.505	-1.17418	0.877022	2	-0.564098	0.83818	0	0.2	323	zinc ABC transporter ATP-binding protein ZnuC
C_RS07830	7.24752	-0.658861	0.509178	1	-0.985328	1.41857	1	0.2	324	putative cation transport regulator ChaB
C_RS05515	3.74455	-0.563519	0.338305	0	-1.70886	1.77224	2	0.2	325	hypothetical protein
C_RS15905	59.3842	-1.68669	0.977547	3	-0.301876	0.419712	0	0.3	326	two-component sensor histidine kinase BarA
C_RS17505	3.07921	-0.642661	0.296864	0	-1.01379	2.85013	2	0.2	327	hypothetical protein
C_RS02805	4.63168	-0.579332	0.667486	1	-1.47371	2.76426	1	0.2	328	NfeD family protein
C_RS01460	4.62376	-0.556584	0.441613	0	-1.74734	3.2545	2	0.2	329	AlpA family transcriptional regulator
C_RS15955	24.4317	-0.889043	0.564555	2	-0.624094	0.724764	0	0.2	330	nucleotide 5'-monophosphate nucleosidase
C_RS15635	17.095	-1.08611	0.421277	2	-0.559169	0.725858	0	0.2	331.5	hydrogenase formation protein HypD
C_RS18545	4.0198	-0.5972	0.419452	0	-1.2533	2.33516	2	0.2	331.5	DNA damage response exodeoxyribonuclease YhbQ
C_RS25555	11.5248	-0.725354	0.345692	1	-0.783789	1.11674	1	0.2	333	YjiH family protein
C_RS05530	5.82178	-0.5806	0.409936	0	-1.35272	1.24374	2	0.2	334	class II D-tagatose-bisphosphate aldolase, non-catalytic subunit
C_RS15075	19.5505	-1.01378	0.486676	2	-0.566513	0.631398	0	0.2	335	phage portal protein
C_RS24285	5.14059	-0.556924	0.279289	0	-1.64975	1.66395	2	0.2	336	(4Fe-4S)-binding protein
C_RS03565	14.3287	-0.969788	0.819873	2	-0.573389	0.955349	0	0.2	337	dihydrodipicolinate synthase family protein
C_RS20690	0.00990099	-0.0137918	0.00970001	0	Inf	NA	5	0.5	338	glycine--tRNA ligase subunit alpha
C_RS10240	26.4	-1.34914	0.574518	3	-0.297189	0.45008	0	0.3	339	DNA topoisomerase III
C_RS10410	2.13663	-0.527546	0.340784	0	-2.28728	2.92427	2	0.2	340	YoaK family small membrane protein
C_RS09115	19.4871	-1.04873	0.875828	2	-0.550511	0.861703	0	0.2	341	type II toxin-antitoxin system serine/threonine protein kinase toxin HipA
C_RS13995	0.556436	-0.0284681	0.0311888	0	-3.21012	0.43348	5	0.5	342	NAD-dependent DNA ligase LigA
C_RS09975	1.38416	-0.400744	0.200958	0	-2.78358	2.07587	3	0.3	343.5	integration host factor subunit alpha
C_RS24865	2.01386	-0.400376	0.232917	0	-2.8878	2.1918	3	0.3	343.5	adenylosuccinate synthase
C_RS11655	25.505	-1.00386	0.527251	2	-0.55451	0.716669	0	0.2	345	colibactin biosynthesis amidase ClbL
C_RS00520	0.510891	-0.0344564	0.0473762	0	-3.0527	0.567289	5	0.5	346	cell division protein FtsA
C_RS08035	1.11881	-0.402902	0.180244	0	-2.48962	1.81387	3	0.3	347	TonB system transport protein TonB
C_RS25300	0.647525	-0.324996	0.103478	0	-2.72275	0.848316	4	0.4	348	DNA polymerase III subunit chi
C_RS17595	9.14653	-0.789448	0.446474	1	-0.664434	1.50132	1	0.2	349	transcriptional regulator GlcC
C_RS02655	2.11287	-0.400558	0.251418	0	-2.70171	1.47995	3	0.3	350	hemolysin expression modulator Hha
C_RS05215	3.43762	-0.545081	0.210799	0	-1.70022	1.22276	2	0.2	351	acylphosphatase
C_RS13570	8.77426	-0.984039	0.178877	0	-1.25705	0.701447	1	0.1	352	DedA family protein
C_RS04080	13.6277	-0.639638	0.534762	1	-0.924104	1.51692	1	0.2	353	GTP 3',8-cyclase MoaA
C_RS04310	18.1861	-0.680749	0.718917	1	-0.822788	0.784538	1	0.2	354	molybdopterin molybdotransferase MoeA
C_RS15920	26.0653	-1.14235	0.920078	2	-0.513014	0.571038	0	0.2	355	galactarate/glucarate/glycerate transporter GudP
C_RS00845	37.9426	-1.34477	0.531681	3	-0.284652	0.302109	0	0.3	356	ATP-dependent helicase HrpB
C_RS17755	4.08911	-1.04828	0.211933	1	1.13936	0.475002	0	0.1	357	tol-pal system-associated acyl-CoA thioesterase
C_RS19185	0.471287	-0.0137918	0.00970001	0	-2.98803	0.425542	5	0.5	358	L-threonylcarbamoyladenylate synthase type 1 TsaC
C_RS22355	1.40792	-0.402491	0.146863	0	-2.26958	1.26876	3	0.3	359	tyrosine recombinase XerC
C_RS19955	35.8832	-1.2197	0.463349	2	-0.497425	0.382088	0	0.2	360	glycogen synthase GlgA
C_RS05380	4.73267	-0.554102	0.250019	0	-1.43712	1.19031	2	0.2	361	pyrimidine utilization flavin reductase protein F
C_RS11355	1.82574	-0.428514	0.295449	0	-1.35517	3.06043	3	0.3	362	conjugal transfer protein TraD
C_RS09860	18.1663	-0.880581	0.604572	2	-0.576892	0.566045	0	0.2	363	MFS transporter
C_RS15510	3.96238	-0.568343	0.462689	1	-1.2319	3.09015	1	0.2	364	transcriptional regulator GutM
C_RS20710	4.26733	-0.522181	0.196871	0	-1.99365	1.54531	2	0.2	365	hypothetical protein
C_RS01315	10.9683	-0.718791	0.671569	1	-0.709358	0.950594	1	0.2	366	hypothetical protein
C_RS07505	3.38416	-0.408804	0.20963	0	-1.80025	2.21839	3	0.3	367	DUF1398 domain-containing protein
C_RS14595	18.8594	-0.965248	0.669887	2	-0.533881	0.74851	0	0.2	368	two-component system response regulator GlrR
C_RS14675	1.31287	-0.312105	0.18352	0	-3.47452	2.64975	4	0.4	369	signal peptidase I
C_RS18140	0.372277	-0.0137918	0.00970001	0	-2.56566	0.36145	5	0.5	370	tRNA (adenosine(37)-N6)-threonylcarbamoyltransferase complex transferase subunit TsaD
C_RS10080	23.0198	-0.92977	0.429366	2	-0.540625	0.642392	0	0.2	371	6-phospho-beta-glucosidase
C_RS08180	0.370297	-0.0137918	0.00970001	0	-2.55476	0.211882	5	0.5	372	GTP cyclohydrolase II
C_RS11020	29.2614	-0.994851	0.570167	2	-0.52062	0.644877	0	0.2	373	excinuclease ABC subunit UvrC
C_RS08080	26.6455	-0.94825	0.616375	2	-0.533057	0.324554	0	0.2	374	bifunctional indole-3-glycerol-phosphate synthase TrpC/phosphoribosylanthranilate isomerase TrpF
C_RS10660	5.19802	-0.565306	0.518013	1	-1.18931	1.27834	1	0.2	375	CopC domain-containing protein YobA
C_RS06310	22.5584	-1.17761	0.57848	2	-0.482952	0.335518	0	0.2	376	flagellar hook protein FlgE
C_RS22775	24.1267	-0.876109	0.580137	2	-0.558489	0.667532	0	0.2	377	ribosome-dependent GTPase TypA
C_RS00430	25.5683	-1.33417	0.888462	2	-0.472944	0.589137	0	0.2	378	transcriptional regulator LeuO
C_RS24820	0.346535	-0.0137918	0.00970001	0	-2.44967	0.277243	5	0.5	379	tRNA (adenosine(37)-N6)-threonylcarbamoyltransferase complex ATPase subunit type 1 TsaE
C_RS10415	5.10891	-0.786284	0.388747	0	-1.65507	1.68061	1	0.1	380	GlsB/YeaQ/YmgE family stress response membrane protein
C_RS06850	3.17228	-0.511952	0.248567	0	-2.0548	1.55032	2	0.2	381	phage tail protein
C_RS25625	45.6851	-1.40873	0.538637	3	-0.268213	0.198792	0	0.3	382	DEAD/DEAH box helicase family protein
C_RS08865	3.2	-0.530536	0.357309	0	-1.60181	2.41509	2	0.2	383	peptidase M35
C_RS07525	1.60396	-0.43552	0.178139	0	-1.12061	2.58393	3	0.3	384	hypothetical protein
C_RS22340	3.58614	-0.393705	0.16952	0	-2.34953	1.82715	3	0.3	385	lipoprotein
C_RS24150	2.26931	-0.544679	0.294936	0	-1.35297	1.38733	2	0.2	386	phosphonate C-P lyase system protein PhnH
C_RS07455	1.89109	-0.508556	0.281112	0	-2.06863	3.00826	2	0.2	387	hypothetical protein
C_RS14905	0.742574	-0.0418715	0.0409934	0	-1.969	2.38202	5	0.5	388	nucleotide exchange factor GrpE
C_RS13380	0.625743	-0.313462	0.119625	0	-2.59146	1.12076	4	0.4	389	NADH-quinone oxidoreductase subunit NuoK
C_RS18175	3.69307	-0.535626	0.211805	0	-1.43662	2.25687	2	0.2	390	DNA-binding transcriptional regulator NfeR
C_RS16700	2.20396	-0.493162	0.229229	0	-2.48523	2.18006	2	0.2	391	PTS mannitol transporter subunit IIA
C_RS09365	25.1822	-1.12713	0.179514	1	-0.915494	0.172803	0	0.1	392	MFS transporter
C_RS10310	29.8535	-1.4551	0.806001	2	-0.444261	0.4712	0	0.2	393	MFS transporter
C_RS04065	35.501	-1.07093	0.37856	2	-0.47279	0.314889	0	0.2	394	excinuclease ABC subunit B
C_RS17230	22.8891	-0.997553	0.452652	1	-0.983203	0.252367	0	0.1	395	aerobactin synthase IucA
C_RS05370	1.13465	-0.383364	0.177701	0	-2.58892	1.80626	3	0.3	396	general stress protein
C_RS21590	1.05941	-0.325871	0.152159	0	-1.67318	2.58993	4	0.4	397	hypothetical protein
C_RS12615	9.91287	-0.927556	0.350413	1	-1.03205	0.777366	0	0.1	398	glycine betaine ABC transporter ATP binding protein YehX
C_RS04440	2.25545	-0.490081	0.31145	0	-2.41259	1.83815	2	0.2	399	DUF5347 domain-containing protein
C_RS10390	23.3327	-1.11514	0.600621	2	-0.460163	0.508011	0	0.2	400	2-nitroimidazole transporter
C_RS06580	4.11683	-0.515077	0.173947	0	-1.65889	1.28726	2	0.2	401	cell division inhibition protein DicB
C_RS04350	22.0317	-0.894815	0.734047	2	-0.511291	0.737224	0	0.2	402	30S ribosomal protein S12 methylthiotransferase RimO
C_RS05655	39.4752	-1.30137	0.611206	3	-0.256437	0.290872	0	0.3	403	hemagglutinin repeat-containing protein
C_RS04390	4.5802	-0.570907	0.235199	0	-1.00196	1.21616	2	0.2	404	hypothetical protein
C_RS10215	7.91287	-0.794224	0.433661	0	-1.3276	1.08635	1	0.1	405	YnjH family protein
C_RS10740	18.8178	-0.710774	0.689464	1	-0.647512	1.04029	1	0.2	406	pyruvate kinase
C_RS18400	0.560396	-0.383588	0.106219	0	-2.4197	0.683113	3	0.3	407	DNA-binding transcriptional activator TdcR
C_RS25870	26.7822	-1.14906	0.626504	2	-0.450486	0.791992	0	0.2	408	multifunctional transcriptional regulator/nicotinamide-nucleotide adenylyltransferase/ribosylnicotinamide kinase NadR
C_RS18515	5.27525	-0.536807	0.410459	0	-1.21185	1.66394	2	0.2	409	YraN family protein
C_RS08270	24.7287	-0.955156	0.716341	2	-0.480363	0.524283	0	0.2	410	multidrug effflux MFS transporter
C_RS01370	3.48119	-0.514913	0.230918	0	-1.53517	2.29125	2	0.2	411	hypothetical protein
C_RS23740	0.710891	-0.409356	0.20249	0	-1.29371	1.8868	3	0.3	412	diacylglycerol kinase
C_RS08810	22.5842	-1.45318	0.858699	2	-0.423359	0.671716	0	0.2	413	YncE family protein
C_RS08175	46.5228	-1.54594	0.680201	3	-0.239107	0.496356	0	0.3	414	aconitate hydratase AcnA
C_RS03685	28.4733	-1.27184	0.155368	2	-0.42597	0.355288	0	0.2	415	potassium-transporting ATPase subunit KdpA
C_RS09350	7.66139	-0.616386	0.467889	1	-0.761824	1.05646	1	0.2	416	ATP-dependent dethiobiotin synthetase BioD
C_RS29205	4.42772	-0.504144	0.222764	0	-1.6573	1.99547	2	0.2	417	metal ABC transporter permease
C_RS16045	21.6059	-0.742152	0.76311	1	-0.583821	1.05361	1	0.2	418	murein transglycosylase A
C_RS29790	1.08911	-0.298024	0.156763	0	-2.63854	1.81878	4	0.4	419	hypothetical protein
C_RS00425	3.42178	-0.537674	0.280171	0	-1.12692	1.35917	2	0.2	420	leu operon leader peptide
C_RS05605	16.0277	-0.909369	0.475147	1	-0.94762	0.448813	0	0.1	421	glycosyltransferase
C_RS18210	18.7109	-0.597083	0.599262	1	-0.829135	1.06496	1	0.2	422	amino acid permease
C_RS03380	1.61782	-0.376205	0.188145	0	-2.4875	2.74657	3	0.3	423	23S rRNA (pseudouridine(1915)-N(3))-methyltransferase RlmH
C_RS03840	0.407921	-0.0137918	0.00970001	0	-1.61996	2.78146	5	0.5	424	Tol-Pal system protein TolQ
C_RS20705	7.7505	-0.545904	0.408371	0	-1.04315	1.22438	2	0.2	425	YiaB family inner membrane protein
C_RS22190	0.390099	-0.0137918	0.00970001	0	-1.58451	2.22849	5	0.5	426	rho operon leader peptide rhoL
C_RS28605	1.75644	-0.380395	0.216513	0	-2.10741	2.6696	3	0.3	427	protein YoaJ
C_RS08845	8.0495	-0.927501	0.384944	1	-0.917866	0.594453	0	0.1	428	hypothetical protein
C_RS02305	13.5406	-0.902401	0.273901	0	-0.935376	0.793978	1	0.1	429	AroM family protein
C_RS12910	0.457426	-0.0137918	0.00970001	0	-1.56109	3.29451	5	0.5	430	50S ribosomal protein L25
C_RS13480	25.7505	-1.12619	0.442631	2	-0.425334	0.583538	0	0.2	431	putative basic amino acid antiporter YfcC
C_RS08045	2.08911	-0.509234	0.210962	0	-1.39601	2.1978	2	0.2	432	septation protein A
C_RS22225	9.87723	-0.779698	0.17202	0	-1.1714	0.589532	1	0.1	433	dTDP-glucose 4,6-dehydratase
C_RS28335	15.5485	-0.977304	0.431933	1	-0.857402	0.595678	0	0.1	434	fimbrial protein
C_RS20290	5.40594	-1.06165	0.47971	1	0.805187	0.680168	0	0.1	435	inorganic phosphate transporter PitA
C_RS21355	9.29505	-0.761888	0.42521	1	-1.19487	0.507562	0	0.1	436	DNA-binding protein
C_RS16975	5.07921	-0.635432	0.431285	1	-0.68146	1.42424	1	0.2	437	IS66 family insertion sequence hypothetical protein
C_RS09000	5.66733	-0.728427	0.296299	0	-1.32074	0.557157	1	0.1	438	diguanylate cyclase
C_RS12500	10.5921	-0.70447	0.23068	0	-1.42514	0.798559	1	0.1	439	putative fimbrial-like adhesin protein
C_RS11260	3.76436	-0.383275	0.214418	0	-1.72316	2.52046	3	0.3	440	VSPR family DNA mismatch endonuclease
C_RS20350	6.47327	-0.671449	0.422273	0	-1.64694	1.21824	1	0.1	441	helix-turn-helix transcriptional regulator
C_RS10345	22.1327	-1.20618	0.679347	3	-0.228534	0.647937	0	0.3	442	scaffolding protein MipA
C_RS04505	10.4713	-0.867871	0.519063	1	-0.904836	0.897085	0	0.1	443	phage major capsid protein, P2 family
C_RS09450	15.9545	-0.8135	0.383429	1	-0.987843	0.786888	0	0.1	444	class I fumarate hydratase
C_RS23465	4.11089	-0.813907	0.418373	1	0.979349	1.18851	0	0.1	445	YjaG family protein
C_RS29505	1.69109	-0.289231	0.0931952	0	-2.36075	1.58562	4	0.4	446	hypothetical protein
C_RS09600	15.503	-0.957882	0.468329	2	-0.432575	0.152996	0	0.2	447.5	anhydro-N-acetylmuramic acid kinase
C_RS23720	13.604	-0.839869	0.686838	1	-0.470601	0.970769	1	0.2	447.5	maltose operon protein MalM
C_RS20240	1.0297	-0.3736	0.157299	0	-1.9934	2.22214	3	0.3	449	PTS sugar transporter subunit IIB
C_RS18715	6.21782	-0.710765	0.141372	0	-1.27176	0.547893	1	0.1	450	DNA-binding transcriptional regulator SfsB
C_RS13740	2.77426	-0.480909	0.144313	0	-1.65816	1.65672	2	0.2	451	tyrosine-type recombinase/integrase
C_RS21400	13.8	-0.851035	0.433983	1	-0.900338	0.677706	0	0.1	452	propanediol utilization microcompartment proteinPduB
C_RS03440	7.99208	-0.86015	0.358883	0	-0.89018	1.20155	1	0.1	453	glutamate/aspartate ABC transporter substrate-binding protein GltI
C_RS08630	6.66337	-0.559116	0.558308	1	-0.858285	1.7975	1	0.2	454	FMN-dependent NADH-azoreductase
C_RS13435	22.101	-1.03514	0.544741	1	-0.747955	0.437199	0	0.1	455	alanine transaminase AlaA
C_RS05440	11.8594	-0.858229	0.418061	1	-0.882724	0.58595	0	0.1	456	deferrochelatase/peroxidase EfeB
C_RS07200	3.20792	-0.484338	0.336623	0	-1.5318	2.00466	2	0.2	457	Restriction inhibitor protein ral
C_RS13485	5.77822	-0.598106	0.632416	1	-0.707677	1.80975	1	0.2	458	NUDIX hydrolase YfcD
C_RS04645	3	-0.481649	0.217118	0	-1.56889	1.59807	2	0.2	459.5	DUF1418 family protein
C_RS22750	2.56634	-0.453295	0.353346	0	-2.35133	3.05221	2	0.2	459.5	YshB family small membrane protein
C_RS06590	3.37228	-0.483846	0.277539	0	-1.51887	1.03948	2	0.2	461	hypothetical protein
C_RS11300	14.3366	-0.663344	0.568424	1	-0.593728	1.07859	1	0.2	462	two-component system sensor histidine kinase HprS
C_RS04430	5.9802	-0.726192	0.276471	0	-1.12971	1.01188	1	0.1	463	hypothetical protein
C_RS19705	1.48713	-0.749678	0.467734	1	0.501623	1.05167	1	0.2	464	shikimate kinase AroK
C_RS10870	8.02178	-0.864264	0.464398	1	-0.839724	0.942791	0	0.1	465.5	protein phosphatase CheZ
C_RS05025	11.3881	-0.785572	0.366426	0	-0.958735	0.767701	1	0.1	465.5	YcbK family protein
C_RS11700	53.0455	-1.21585	0.578107	2	-0.376257	0.210893	0	0.2	467	colibactin polyketide synthase ClbC
C_RS13220	20.7267	-0.835098	0.556966	2	-0.448746	0.552416	0	0.2	468	ISNCY family transposase
C_RS25685	9.94653	-0.701634	0.426095	0	-1.18078	1.22198	1	0.1	469	zinc-binding alcohol dehydrogenase family protein
C_RS25710	13.0812	-0.941949	0.485231	2	-0.409723	1.02417	0	0.2	470	threonine/serine exporter
C_RS01765	7.53663	-0.743109	0.265254	0	-1.00147	0.673905	1	0.1	471	xanthine phosphoribosyltransferase
C_RS14215	12.3406	-0.778514	0.467008	1	-0.929721	0.634438	0	0.1	472	GDP-mannose pyrophosphatase NudK
C_RS01665	124.43	-1.70636	0.950578	3	-0.193962	0.30078	0	0.3	473	hypothetical protein
C_RS08155	1.15248	-0.360428	0.188862	0	-2.17121	2.28888	3	0.3	474	HTH-type transcriptional regulator CysB
C_RS18970	11.4	-0.866696	0.34599	1	-0.777112	1.20934	0	0.1	475	nucleoside triphosphate pyrophosphatase YhdE
C_RS16670	10.2931	-0.745664	0.558821	1	-0.48598	1.56809	1	0.2	476	sulfate/molybdate ABC transporter ATP-binding protein
C_RS10600	25.303	-1.11135	0.377198	2	-0.371958	0.552471	0	0.2	477.5	carboxy terminal-processing peptidase
C_RS08320	2.98416	-0.477613	0.257115	0	-1.39924	1.34596	2	0.2	477.5	envelope stress response membrane protein PspB
C_RS11780	3.81584	-0.460277	0.198318	0	-1.71418	0.90788	2	0.2	479	PIG-L family deacetylase
C_RS00725	11.2119	-0.78442	0.432136	1	-0.901367	0.744166	0	0.1	480	hypoxanthine phosphoribosyltransferase
C_RS16615	21.4554	-0.888403	0.37649	1	-0.755021	0.690181	0	0.1	481	LysR family transcriptional regulator
C_RS11365	1.93267	-0.438399	0.226138	0	-2.42658	2.07657	2	0.2	482	toll/interleukin-1 receptor domain-containing protein
C_RS04800	37.5208	-1.11027	0.674091	2	-0.367999	0.389818	0	0.2	483	macrolide ABC transporter ATP-binding protein/permease MacB
C_RS20765	5.00396	-0.544115	0.535873	1	-0.808355	1.73922	1	0.2	484	4Fe-4S binding protein
C_RS06175	32.1485	-1.05493	0.650531	2	-0.37439	0.666658	0	0.2	485	glucans biosynthesis glucosyltransferase MdoH
C_RS29085	0.566337	-0.273646	0.0969954	0	-2.16252	1.06818	4	0.4	486	protein YliM
C_RS05495	10.0931	-0.559785	0.4593	1	-0.738124	1.12927	1	0.2	487	AlpA family transcriptional regulator
C_RS02615	22.7545	-0.906916	0.345382	1	-0.719729	0.196117	0	0.1	488	ammonium transporter AmtB
C_RS12135	12.6059	-0.870561	0.583765	1	-0.748605	0.41896	0	0.1	489	colanic acid biosynthesis phosphomannomutase CpsG
C_RS08075	17.2733	-0.845495	0.452425	1	-0.773429	0.391366	0	0.1	490	tryptophan synthase subunit beta
C_RS17320	9.8396	-0.656245	0.461174	1	-0.55352	0.970478	1	0.2	491	inovirus Gp2 family protein
C_RS29840	5.84158	-0.532172	0.475074	1	-0.845174	1.72628	1	0.2	492	GNAT family N-acetyltransferase
C_RS02690	0.827723	-0.508383	0.245775	0	0.486448	2.45975	3	0.3	493	pleiotropic regulatory protein RsmS
C_RS09430	15.6475	-0.810821	0.989987	1	-0.427044	0.908127	1	0.2	494	two-component system response regulator RstA
C_RS24115	3.37426	-0.468876	0.220072	0	-1.3605	1.58955	2	0.2	495	aminoalkylphosphonate N-acetyltransferase
C_RS24835	2.41386	-0.358588	0.149495	0	-1.90801	2.22246	3	0.3	496	tRNA (adenosine(37)-N6)-dimethylallyltransferaseMiaA
C_RS24525	3.20792	-0.461821	0.167255	0	-1.48091	1.18756	2	0.2	497	major pilus subunit operon regulatory protein PapB
C_RS18375	43.5545	-1.11518	0.557664	1	-0.624272	0.215539	0	0.1	498	2-ketobutyrate formate-lyase/pyruvate formate-lyase
C_RS00535	1.06535	-0.22751	0.111648	0	-4.24294	1.91234	4	0.4	499	secA regulator SecM
C_RS24625	9.97228	-0.462952	0.297755	0	-1.39393	1.26263	2	0.2	500	AAA family ATPase
C_RS13390	0.908911	-0.348204	0.133748	0	-2.39011	1.5187	3	0.3	501	NADH-quinone oxidoreductase subunit NuoI
C_RS02045	9.04158	-0.46295	0.286491	0	-1.37893	0.74166	2	0.2	502	DUF2877 domain-containing protein
C_RS08060	6.18416	-0.537555	0.431138	0	-0.765791	1.7344	2	0.2	503	ferritin-like domain-containing protein
C_RS13325	15.7129	-0.848004	0.341342	1	-0.731322	0.413115	0	0.1	504	2-succinyl-5-enolpyruvyl-6-hydroxy-3- cyclohexene-1-carboxylic-acid synthase
C_RS22335	34.996	-0.920782	0.378679	2	-0.38122	0.436759	0	0.2	505	hypothetical protein
C_RS10670	13.4772	-0.706296	0.448924	1	-0.960622	0.720787	0	0.1	506	carbon-nitrogen hydrolase family protein
C_RS19425	6.89901	-0.720866	0.366378	0	-0.932313	1.05923	1	0.1	507	type II secretion system minor pseudopilin GspI
C_RS06610	0.518812	-0.260012	0.105704	0	-2.16109	1.76488	4	0.4	508	Rha family transcriptional regulator
C_RS10365	38.5347	-1.24354	0.50536	2	-0.339586	0.349437	0	0.2	509	GGDEF domain-containing protein
C_RS08725	7.13861	-0.6496	0.300744	0	-1.15542	1.38403	1	0.1	510	DNA-binding transcriptional regulator SutR
C_RS18800	14.9465	-0.739366	0.514982	1	-0.882316	0.830893	0	0.1	511	RNase adapter RapZ
C_RS03920	3.99208	-0.628424	0.345848	0	-1.26336	1.26987	1	0.1	512	YbgS-like family protein
C_RS16865	29.8495	-1.06262	0.611302	2	-0.349683	0.718084	0	0.2	513	nucleoside permease NupG
C_RS11315	12.0832	-0.649889	0.347912	0	-1.12084	0.918216	1	0.1	514.5	protein-methionine-sulfoxide reductase catalyticsubunit MsrP
C_RS08210	3.85941	-0.586721	0.377638	0	-1.67483	2.73167	1	0.1	514.5	osmotically-inducible lipoprotein OsmB
C_RS12690	9.40594	-0.607552	0.482409	1	-0.582939	1.27105	1	0.2	516	outer membrane permeability protein SanA
C_RS06525	0.306931	-0.258753	0.0402969	0	-2.03654	0.550262	4	0.4	517	lipoprotein-releasing ABC transporter permease subunit LolE
C_RS02575	14.6218	-0.777213	0.477991	1	-0.787367	0.549437	0	0.1	518	7-cyano-7-deazaguanine synthase QueC
C_RS02720	4.61386	-0.438721	0.155798	0	-1.76382	1.11443	2	0.2	519	recombination protein RecR
C_RS02980	1.11287	-0.217588	0.0812871	0	-3.42348	1.22239	4	0.4	520	bifunctional methylenetetrahydrofolate dehydrogenase/methenyltetrahydrofolate cyclohydrolase FolD
C_RS02585	17.5901	-0.992036	0.459562	1	-0.629984	0.429827	0	0.1	521	HMP-PP phosphatase
C_RS13580	8.53267	-0.626026	0.251934	0	-1.22998	0.860135	1	0.1	522	aspartate-semialdehyde dehydrogenase
C_RS14220	29.8693	-1.3636	0.460513	3	-0.172468	0.355502	0	0.3	523	formate-dependent uric acid utilization protein AegA
C_RS23285	12.6218	-0.856158	0.495744	1	-0.689684	0.599589	0	0.1	524	HTH-type transcriptional repressor FabR
C_RS13880	21.2693	-1.07805	0.51577	1	-0.601023	0.501384	0	0.1	525	ion channel protein
C_RS18005	11.895	-0.653954	0.344066	0	-1.06478	0.955038	1	0.1	526	zinc transporter ZupT
C_RS15890	10.3683	-0.674812	0.703713	1	-0.489222	1.28332	1	0.2	527	nucleoside triphosphate pyrophosphohydrolase
C_RS04415	20.2495	-0.87462	0.677335	2	-0.375459	0.812984	0	0.2	528	tyrosine-type recombinase/integrase
C_RS03945	13.297	-0.78999	0.392673	1	-0.735962	0.725345	0	0.1	529	galactokinase
C_RS17530	4.8297	-0.596893	0.262775	0	-1.43065	0.951933	1	0.1	530	ABC transporter ATP-binding protein
C_RS28575	32.6099	-1.1721	0.183824	1	-0.573617	0.174262	0	0.1	531	oxygen-sensing cyclic-di-GMP phosphodiesterase
C_RS17420	4.10891	-0.498343	0.357616	0	-0.923465	1.36495	2	0.2	532	RadC family protein
C_RS05140	21.8812	-0.703761	0.522093	1	-0.893546	0.332043	0	0.1	533	Lon protease family protein
C_RS16580	6.87921	-0.680978	0.412187	0	-0.941927	1.0858	1	0.1	534	cell division protein ZapA
C_RS15555	0.659406	-0.211995	0.0605749	0	-2.93057	1.1643	4	0.4	535	helix-turn-helix domain-containing protein
C_RS18110	0.613861	-0.23932	0.0629206	0	-2.28621	1.29736	4	0.4	536	bifunctional dihydroneopterin aldolase/7,8-dihydroneopterin epimerase
C_RS15410	6.8099	-1.29615	0.793626	3	0.166746	0.97226	0	0.3	537	glutamate--cysteine ligase
C_RS15070	12.9842	-0.785904	0.359334	1	-0.728783	0.62835	0	0.1	538	S49 family peptidase
C_RS15880	0.859406	-0.225751	0.0461339	0	-2.46345	0.965282	4	0.4	539	phosphopyruvate hydratase
C_RS25735	7.22376	-0.749584	0.552315	1	-0.419677	1.30091	1	0.2	540	DUF1435 domain-containing protein
C_RS18350	0.861386	-0.335564	0.121265	0	-2.55921	1.54302	3	0.3	541	hypothetical protein
C_RS26425	1.62178	-0.347808	0.22488	0	-1.77742	2.90986	3	0.3	542	DUF2724 domain-containing protein
C_RS08900	14.6851	-0.584943	0.586617	1	-0.59186	1.05474	1	0.2	543	N-hydroxyarylamine O-acetyltransferase
C_RS11245	1.58416	-0.33772	0.157074	0	-2.3578	1.77214	3	0.3	544	DUF2158 domain-containing protein
C_RS06225	16.4535	-0.704938	0.641552	1	-0.447108	1.34037	1	0.2	545	N-methyl-L-tryptophan oxidase
C_RS27865	1.79802	-0.436681	0.237403	0	-1.57616	2.27588	2	0.2	546	helix-turn-helix domain-containing protein
C_RS08960	0.390099	-0.242818	0.0638626	0	-1.99818	1.03893	4	0.4	547	HigA family addiction module antidote protein
C_RS04615	8.19604	-0.76073	0.539328	1	-0.74211	0.548977	0	0.1	548	phage tail protein
C_RS07795	0.879208	-0.218395	0.100529	0	-2.41446	2.26898	4	0.4	549	peptide chain release factor 1
C_RS08915	11	-0.776822	0.66836	2	-0.400585	0.838637	0	0.2	550	nitrate reductase molybdenum cofactor assembly chaperone
C_RS00290	7.19208	-0.632859	0.501379	1	-0.503319	1.2275	1	0.2	551	Co2+/Mg2+ efflux protein ApaG
C_RS10900	9.89703	-0.71321	0.485965	1	-0.822087	0.425863	0	0.1	552	chemotaxis protein CheW
C_RS05955	26.1386	-0.789488	0.447401	1	-0.701065	0.46401	0	0.1	553	SEL1-like repeat protein
C_RS03655	39.1624	-1.05392	0.39192	2	-0.326228	0.359042	0	0.2	554.5	ornithine decarboxylase SpeF
C_RS07980	13.5386	-0.776507	0.546126	1	-0.399115	1.01608	1	0.2	554.5	NAAT family transporter YchE
C_RS02395	0.637624	-0.176191	0.0738986	0	-2.88372	0.6416	4	0.4	556	protein translocase subunit SecF
C_RS07120	7.18614	-0.614641	0.390079	0	-1.12677	1.47469	1	0.1	557	hypothetical protein
C_RS00930	0.388119	-0.22652	0.0375587	0	-2.10808	0.843633	4	0.4	558	2,3,4,5-tetrahydropyridine-2,6-dicarboxylate N-succinyltransferase
C_RS20505	23.396	-0.888435	0.787381	1	-0.621469	0.56495	0	0.1	559	insulinase family protein
C_RS10805	13.0851	-0.768324	0.352022	1	-0.71369	0.321107	0	0.1	560	hydrolase
C_RS14060	16.8495	-0.816615	0.445769	1	-0.664633	1.06565	0	0.1	561	thiosulfate/sulfate ABC transporter substrate-binding protein CysP
C_RS27085	0.40198	-0.261839	0.0406671	0	-1.54578	2.04194	4	0.4	562	hypothetical protein
C_RS01870	2.66931	-0.426069	0.19989	0	-1.70054	1.84099	2	0.2	563	50S ribosomal protein L36
C_RS20925	0.887129	-0.158815	0.101733	0	-2.78042	1.49051	4	0.4	564	NAD(P)H-dependent glycerol-3-phosphate dehydrogenase
C_RS25460	8.90297	-0.530012	0.483413	1	-0.690655	1.49103	1	0.2	565	fimbrial protein
C_RS12665	2.39208	-0.42183	0.30237	0	-1.80722	2.64348	2	0.2	566	protein YohP
C_RS01040	0.576238	-0.0734199	0.133008	0	-3.11807	1.0835	4	0.4	567	tRNA lysidine(34) synthetase TilS
C_RS04185	5.0198	-0.616256	0.285745	0	-1.06765	1.15913	1	0.1	568	DUF1471 domain-containing protein
C_RS05325	18.5406	-0.789928	0.571416	1	-0.675072	0.501385	0	0.1	569	pentaheme c-type cytochrome TorC
C_RS06295	5.7505	-0.464047	0.33307	0	-1.01517	1.1305	2	0.2	570	flagellar basal body rod protein FlgB
C_RS04855	7.35644	-0.60515	0.380801	0	-1.11439	0.75348	1	0.1	571.5	leucine-responsive transcriptional regulator Lrp
C_RS10920	8.40594	-0.595204	0.177807	0	-1.1825	0.804152	1	0.1	571.5	flagellar transcriptional regulator FlhC
C_RS19410	21.7149	-0.790684	0.608268	1	-0.668177	0.71109	0	0.1	573	type II secretion system inner membrane protein GspF
C_RS00455	3.10495	-0.337886	0.260348	0	-1.89223	1.91929	3	0.3	574	division/cell wall cluster transcriptional repressor MraZ
C_RS09475	35.9624	-1.17563	0.61076	2	-0.300252	0.57141	0	0.2	575	beta-glucuronidase
C_RS10180	6.29505	-0.611564	0.507935	1	-1.0601	0.557823	0	0.1	576	carboxymuconolactone decarboxylase family protein
C_RS19725	6.37822	-0.697213	0.475619	0	-0.786336	0.906033	1	0.1	577	DNA utilization protein HofN
C_RS28190	7.20198	-0.611837	0.271561	0	-1.04088	0.992607	1	0.1	578	RNA 2'-phosphotransferase
C_RS29385	2.74257	-0.441719	0.168963	0	-1.23341	1.90136	2	0.2	579	hypothetical protein
C_RS12125	22.3941	-0.787311	0.365283	1	-0.664211	0.278929	0	0.1	580	UDP-glucose 6-dehydrogenase
C_RS06725	3.7505	-0.44186	0.130361	0	-1.22197	1.26666	2	0.2	581	YdfR family protein
C_RS11645	92.204	-1.48124	0.488796	4	0.0116045	0.219279	0	0.4	582	colibactin non-ribosomal peptide synthetase ClbN
C_RS18825	5.31683	-1.3016	0.3694	3	0.144967	0.573819	0	0.3	583	aerobic respiration two-component sensor histidine kinase ArcB
C_RS09815	9.2	-0.720929	0.358712	0	-0.732914	1.71267	1	0.1	584	Fe-S cluster assembly ATPase SufC
C_RS23975	6.13861	-0.585307	0.373027	0	-1.18645	1.48852	1	0.1	585	cytochrome c nitrite reductase Fe-S protein
C_RS02470	6.54851	-0.598276	0.263862	0	-1.09362	0.858377	1	0.1	586	protein deglycase YajL
C_RS20400	13.0079	-0.629407	0.426583	1	-0.934146	0.557297	0	0.1	587	MgtC/SapB family protein
C_RS12550	1.29307	-0.429246	0.351864	0	-1.37904	1.871	2	0.2	588	hypothetical protein
C_RS09170	30.6653	-1.26643	0.635863	2	-0.285494	0.422251	0	0.2	589	L-arabinose MFS transporter
C_RS11235	14.105	-0.683405	0.500547	1	-0.775419	0.369101	0	0.1	590	mannosyl-3-phosphoglycerate phosphatase-related protein
C_RS09140	22.299	-1.1403	0.481076	2	-0.291459	0.583773	0	0.2	591	tagaturonate reductase
C_RS09025	58.202	-1.44956	0.414497	3	-0.136897	0.127625	0	0.3	592	insulinase family protein
C_RS12000	5.50099	-0.571694	0.290653	0	-1.24107	1.12838	1	0.1	593	DUF987 domain-containing protein
C_RS28530	0.629703	-0.367972	0.399958	0	0.985313	2.18337	3	0.3	594	biotin/lipoyl-binding protein
C_RS25295	0.544554	-0.0137918	0.00970001	0	-2.95173	1.04091	4	0.4	595	valine--tRNA ligase
C_RS09235	0.70297	-0.322024	0.126105	0	-2.58282	1.03161	3	0.3	596	protein MgtS
C_RS23455	0.960396	-0.0137918	0.00970001	0	-2.9306	2.85461	4	0.4	597	uroporphyrinogen decarboxylase
C_RS14570	58.3485	-1.36351	0.392293	3	-0.136996	0.208076	0	0.3	598	DUF5107 domain-containing protein
C_RS13160	0.60396	-0.0137918	0.00970001	0	-2.88127	1.16361	4	0.4	599	bifunctional 3-demethylubiquinone 3-O-methyltransferase/2-octaprenyl-6-hydroxy phenol methylase
C_RS02670	24.8455	-1.03766	0.29049	1	-0.52347	0.300295	0	0.1	600	multidrug efflux RND transporter periplasmic adaptor subunit AcrA
C_RS20145	6.65941	-0.60584	0.318354	0	-1.00132	1.09739	1	0.1	601	16S rRNA (guanine(966)-N(2))-methyltransferase
C_RS21945	0.419802	-0.0368546	0.0469056	0	-2.40249	0.860737	4	0.4	602	glutamine--fructose-6-phosphate transaminase (isomerizing)
C_RS09335	16.2554	-0.954418	0.640828	1	-0.540258	0.866784	0	0.1	603	dimethyl sulfoxide reductase anchor subunit
C_RS06340	28.6396	-0.996018	0.405026	1	-0.530069	0.189187	0	0.1	604	flagellar hook-associated protein FlgK
C_RS04330	19.9723	-0.850861	0.407318	1	-0.589723	0.34118	0	0.1	605	glutathione ABC transporter permease GsiC
C_RS09010	32.5624	-0.882332	0.414385	2	-0.326413	0.412357	0	0.2	606	acid resistance gamma-aminobutyrate antiporter GadC
C_RS10915	14.4475	-0.821649	0.433422	1	-0.605527	0.417639	0	0.1	607	flagellar motor stator protein MotA
C_RS18980	0.522772	-0.0137918	0.00970001	0	-2.60386	1.57673	4	0.4	608	rod shape-determining protein MreC
C_RS24940	17.3644	-0.661895	0.297041	0	0.80028	3.57952	1	0.1	609	L-ascorbate 6-phosphate lactonase
C_RS29425	0.425743	-0.207888	0.0643976	0	-1.75425	1.70266	4	0.4	610	protein YqfH
C_RS19180	10.7168	-0.56049	0.216104	0	-1.26471	0.810526	1	0.1	611	shikimate dehydrogenase
C_RS10280	19.7683	-0.821908	0.597785	1	-0.594404	0.334026	0	0.1	612	MFS transporter
C_RS26815	0.594059	-0.0137918	0.00970001	0	-2.47208	1.82554	4	0.4	613	trp operon leader peptide
C_RS01660	22.899	-0.82702	0.575262	2	-0.337737	0.802848	0	0.2	614	HlyD family type I secretion periplasmic adaptorsubunit
C_RS04515	4.45941	-0.475779	0.263238	0	-0.832475	1.45797	2	0.2	615	head completion/stabilization protein
C_RS23895	41.3802	-0.832017	0.475498	1	-0.584955	0.443343	0	0.1	616	excinuclease ABC subunit UvrA
C_RS23615	9.50099	-0.590295	0.370344	0	-1.03068	0.992371	1	0.1	617	PTS system mannose/fructose/N-acetylgalactosamine-transporter subunit IIB
C_RS17520	3.88119	-0.538707	0.149677	0	-1.46809	1.09667	1	0.1	618	hypothetical protein
C_RS05575	6.56238	-0.561393	0.436831	0	-1.19077	0.896238	1	0.1	619	3-hydroxy-fatty acyl-ACP dehydratase
C_RS07670	29.7842	-1.0391	0.468752	1	-0.498449	0.591626	0	0.1	620	potassium/proton antiporter
C_RS02235	23.2574	-0.936148	0.394583	1	-0.528527	0.383448	0	0.1	621	peptide antibiotic transporter SbmA
C_RS08815	25.2871	-0.818455	0.454151	1	-0.585819	0.431828	0	0.1	622	L-asparagine permease
C_RS02790	31.4297	-1.08302	0.758269	3	-0.139276	0.520273	0	0.3	623	amino acid permease
C_RS11665	110.349	-1.70635	0.715155	3	-0.11967	0.160149	0	0.3	624	colibactin non-ribosomal peptide synthetase ClbJ
C_RS10620	39.3861	-1.02797	0.656402	1	-0.496242	0.493119	0	0.1	625	lipid-binding membrane homeostasis protein YebT
C_RS14070	12.7485	-0.87861	0.160586	0	-1.20032	0.514466	0	0	626	N-acetylmuramic acid 6-phosphate etherase
C_RS00730	0.742574	-0.0137918	0.00970001	0	-2.23207	2.89517	4	0.4	627	carbonate dehydratase
C_RS07045	0.49505	-0.0485238	0.0545118	0	-1.93748	2.18115	4	0.4	628	adenylosuccinate lyase
C_RS00445	0.322772	-0.0137918	0.00970001	0	-2.21774	0.514349	4	0.4	629	fruR/shl operon leader peptide
C_RS25465	8.85347	-0.638904	0.338772	0	-0.801871	1.09123	1	0.1	630	type 1 fimbrial protein
C_RS04180	18.398	-0.856887	0.569858	2	-0.317264	0.797432	0	0.2	631	hydroxycarboxylate dehydrogenase HcXB
C_RS19975	0.384158	-0.0137918	0.00970001	0	-2.1288	0.74212	4	0.4	632	aspartate-semialdehyde dehydrogenase
C_RS09265	4.81386	-0.415171	0.161732	0	-1.4026	1.14766	2	0.2	633	DNA-binding transcriptional regulator YdfH
C_RS13590	19.4554	-0.797802	0.422189	1	-0.586943	0.751927	0	0.1	634	flagella biosynthesis regulator Flk
C_RS01655	55.1386	-1.40663	0.670047	2	-0.261135	0.280533	0	0.2	635	type I secretion system permease/ATPase
C_RS17995	17.5465	-0.740457	0.456163	1	-0.635691	0.581811	0	0.1	636	protein-disulfide oxidoreductase DsbI
C_RS04455	9.45743	-0.700796	0.531353	1	-0.678881	0.775339	0	0.1	637.5	DNA adenine methylase
C_RS24975	10.6455	-0.56304	0.368243	0	-1.11075	0.995617	1	0.1	637.5	DUF1471 domain-containing protein
C_RS28275	40.0337	-0.901439	0.443023	1	-0.524906	0.343122	0	0.1	639.5	ISL3 family transposase
C_RS02910	16.2693	-0.632862	0.464468	0	-0.807054	1.1924	1	0.1	639.5	allantoate deiminase
C_RS02610	3.96634	-0.439028	0.209277	0	-1.01581	1.36528	2	0.2	641	P-II family nitrogen regulator
C_RS29620	5.74851	-0.455763	0.381946	0	-0.892131	1.46871	2	0.2	642	hypothetical protein
C_RS03215	9.4	-0.575771	0.361093	0	-1.02799	1.00315	1	0.1	643	ParB-like nuclease domain-containing protein
C_RS14665	0.368317	-0.0137918	0.00970001	0	-2.03582	1.30896	4	0.4	644	GTPase Era
C_RS09345	23.8376	-0.918125	0.437857	1	-0.509678	0.407754	0	0.1	645	voltage-gated ClC-type chloride channel ClcB
C_RS20685	0.364356	-0.0137918	0.00970001	0	-2.01362	1.25368	4	0.4	646	glycine--tRNA ligase subunit beta
C_RS07050	3.29109	-0.528807	0.208475	0	-1.46597	2.54135	1	0.1	647	high frequency lysogenization protein HflD
C_RS07535	1.43168	-0.402256	0.220353	0	-1.67451	2.53592	2	0.2	648	hypothetical protein
C_RS23915	2.98614	-0.393073	0.189912	0	-2.0351	3.22486	2	0.2	649	superoxide response transcriptional regulator SoxS
C_RS23335	0.350495	-0.0137918	0.00970001	0	-1.98531	1.08552	4	0.4	650	bifunctional biotin--[acetyl-CoA-carboxylase] ligase/biotin operon repressor BirA
C_RS22860	9.59406	-0.596869	0.410129	0	-0.915487	1.02372	1	0.1	651	hypothetical protein
C_RS25720	16.4376	-0.860472	0.538171	1	-0.534553	0.913114	0	0.1	652	response regulator transcription factor
C_RS12200	17.3228	-0.796047	0.474996	1	-0.572823	0.68776	0	0.1	653	colanic acid undecaprenyl disphosphate flippase WzxC
C_RS29245	10.0495	-0.861602	0.185587	0	-1.15847	0.406652	0	0	654	acetylxylan esterase
C_RS05015	0.417822	-0.0137918	0.00970001	0	-1.96003	1.8098	4	0.4	655	chromosome partition protein MukB
C_RS18660	0.368317	-0.0137918	0.00970001	0	-1.93342	1.26285	4	0.4	656	dihydropteroate synthase
C_RS29795	1.13069	-0.309122	0.162673	0	-2.41069	1.51635	3	0.3	657	hypothetical protein
C_RS01580	137.733	-1.42395	0.467643	3	-0.107746	0.134927	0	0.3	658	hemagglutinin repeat-containing protein
C_RS05485	6.53267	-0.554985	0.409256	0	-1.10563	0.954092	1	0.1	659	hypothetical protein
C_RS00955	0.392079	-0.0137918	0.00970001	0	-1.86853	1.97427	4	0.4	660	UMP kinase
C_RS04450	2.3505	-0.39285	0.305244	0	-1.91198	2.40786	2	0.2	661	TraR/DksA family transcriptional regulator
C_RS01690	0.417822	-0.326188	0.106374	0	-1.57317	1.78538	3	0.3	662	integrating conjugative element protein
C_RS29380	0.594059	-0.0137918	0.00970001	0	-1.8203	2.72136	4	0.4	663	hypothetical protein
C_RS28480	0.146535	-0.380575	0.337849	0	2.5835	3.03865	2	0.2	664	excisionase
C_RS13400	2.88317	-0.507957	0.371463	0	-1.70229	2.10272	1	0.1	665	NADH-quinone oxidoreductase subunit NuoG
C_RS12160	1.42376	-0.383192	0.183967	0	-2.36488	1.50084	2	0.2	666	glycosyltransferase family 4 protein
C_RS08085	22.2891	-0.829489	0.332294	1	-0.533423	0.647913	0	0.1	667	bifunctional anthranilate synthase glutamate amidotransferase component TrpG/anthranilate phosphoribosyltransferase TrpD
C_RS05950	4.87723	-0.553911	0.196329	0	-1.06923	1.18959	1	0.1	668	transposase domain-containing protein
C_RS18865	14.5465	-0.914907	0.55271	1	-0.487622	0.881921	0	0.1	669	N-acetylneuraminate lyase
C_RS13660	9.52079	-0.557494	0.505682	1	-0.501874	1.20144	1	0.2	670	fimbrial protein
C_RS16525	1.12079	-0.344364	0.174066	0	-1.0685	3.15786	3	0.3	671	tRNA-modifying protein YgfZ
C_RS12870	30.5505	-0.941359	0.461193	1	-0.478438	0.333376	0	0.1	672	ABC transporter substrate-binding protein
C_RS00025	15.1564	-0.877307	0.413126	0	-1.02494	0.740475	0	0	673	threonine synthase
C_RS11115	5.12277	-0.521138	0.245285	0	-1.37101	0.63857	1	0.1	674	sulfurtransferase-like selenium metabolism protein YedF
C_RS06105	4.99208	-0.507187	0.322812	0	-1.6305	2.24162	1	0.1	675	curli production assembly/transport protein CsgF
C_RS26575	1.61584	-0.313605	0.186277	0	-1.88279	2.91292	3	0.3	676	microcin H47
C_RS07745	34.3505	-0.887218	0.433906	1	-0.4913	0.229585	0	0.1	677	PTS-dependent dihydroxyacetone kinase operon transcriptional regulator DhaR
C_RS03475	0.764356	-0.154354	0.10099	0	-1.37747	3.13196	4	0.4	678	2-octaprenyl-3-methyl-6-methoxy-1,4-benzoquinol hydroxylase
C_RS03930	14.2277	-1.00272	0.167743	0	-0.88463	0.409553	0	0	679	3-deoxy-7-phosphoheptulonate synthase AroG
C_RS20295	10.7624	-0.955886	0.202177	0	-0.913622	0.617446	0	0	680	universal stress protein UspB
C_RS08570	3.7703	-0.396985	0.319281	0	-1.53694	1.9514	2	0.2	681	DUF333 domain-containing protein
C_RS06330	17.5644	-0.940458	0.655642	1	-0.468741	0.959003	0	0.1	682	flagellar basal body P-ring protein FlgI
C_RS05825	4.06931	-0.525636	0.508617	1	-0.551121	1.3708	1	0.2	683	sfa/F1C fimbrial biogenesis chaperone
C_RS09835	6.11287	-0.560101	0.192062	0	-0.9484	1.07881	1	0.1	684	1,4-dihydroxy-2-naphthoyl-CoA hydrolase
C_RS05590	25.0178	-0.954896	0.659935	1	-0.45756	0.815192	0	0.1	685	MMPL family transporter
C_RS12395	1.5604	-0.393989	0.335096	0	-1.57858	2.85358	2	0.2	686	hypothetical protein
C_RS03005	6.66931	-0.749509	0.351302	0	-1.29543	0.583294	0	0	687	tail fiber assembly protein
C_RS08525	19.705	-0.82193	0.449989	1	-0.50541	0.636325	0	0.1	688	ATP-dependent RNA helicase DbpA
C_RS02520	8.20396	-0.758455	0.19286	0	-1.24512	0.479488	0	0	689	lipoprotein
C_RS29685	1.19802	-0.292575	0.133835	0	-2.69374	1.68151	3	0.3	690	hypothetical protein
C_RS14575	18.9881	-0.7401	0.437501	1	-0.565602	0.632582	0	0.1	691	ROK family protein
C_RS00460	4.34257	-0.410238	0.140847	0	-1.12245	1.23091	2	0.2	692	16S rRNA (cytosine(1402)-N(4))-methyltransferaseRsmH
C_RS12585	7.74851	-0.660201	0.302001	0	-0.648262	1.16394	1	0.1	693	DUF1456 family protein
C_RS01880	0.443564	-0.262663	0.136078	0	-0.882857	2.64411	4	0.4	694	hypothetical protein
C_RS02620	10.9822	-0.560106	0.329165	0	-0.918031	1.0562	1	0.1	695	acyl-CoA thioesterase II
C_RS03035	29.2297	-1.03656	0.45594	1	-0.434334	0.532128	0	0.1	696	Cu(+)/Ag(+) sensor histidine kinase CusS
C_RS23945	14.7822	-0.625526	0.541612	1	-0.698757	0.737458	0	0.1	697	LrgB family protein
C_RS01860	12.0158	-0.781508	0.152647	0	-1.12272	0.567518	0	0	698	common pilus major fimbrillin subunit EcpA
C_RS00800	78.8238	-1.6116	1.17862	2	-0.224092	0.255696	0	0.2	699	outer membrane usher protein
C_RS26775	0.825743	-0.291637	0.101148	0	-2.50532	1.10222	3	0.3	700	hypothetical protein
C_RS13770	17.5109	-0.746856	0.383113	1	-0.545827	0.632718	0	0.1	701	multidrug efflux MFS transporter periplasmic adaptor subunit EmrK
C_RS15215	4.03564	-0.528205	0.391394	0	-1.11186	1.23187	1	0.1	702	hypothetical protein
C_RS05600	3.93069	-0.521694	0.202922	0	-1.17238	0.980042	1	0.1	703	acyl-CoA thioesterase
C_RS10375	2.00396	-0.373045	0.352105	0	-2.22068	3.64876	2	0.2	704	hypothetical protein
C_RS24300	1.7604	-0.389364	0.290483	0	-1.5649	2.22961	2	0.2	705	type V toxin-antitoxin system toxin GhoT
C_RS16995	6.66337	-0.384953	0.146184	0	-1.66985	1.54573	2	0.2	706	MarR family transcriptional regulator
C_RS03935	8.71881	-0.582086	0.265587	0	-0.799856	1.04577	1	0.1	707	2,3-diphosphoglycerate-dependent phosphoglycerate mutase
C_RS17630	24.8931	-0.903505	0.841089	2	-0.260202	0.67783	0	0.2	708	LPS export ABC transporter permease LptF
C_RS21560	5.28713	-0.591371	0.293418	0	-0.763241	1.09714	1	0.1	709	type IV toxin-antitoxin system YeeU family antitoxin
C_RS07515	19.6634	-0.635785	0.504312	1	-0.656473	0.562086	0	0.1	710	blue light-responsive regulator BluF
C_RS19550	3.65743	-0.509326	0.204082	0	-1.26122	1.0622	1	0.1	711	YheU family protein
C_RS26810	3.14257	-0.37876	0.233616	0	-1.8245	1.29855	2	0.2	712	YkgJ family cysteine cluster protein
C_RS13280	9.54455	-0.827386	0.439326	0	-0.947834	0.926548	0	0	713.5	4-deoxy-4-formamido-L-arabinose- phosphoundecaprenol deformylase
C_RS13290	7.15446	-0.771426	0.296706	0	-1.07211	0.608575	0	0	713.5	4-amino-4-deoxy-L-arabinose-phosphoundecaprenol flippase subunit ArnE
C_RS09660	1.29901	-0.290018	0.113781	0	-2.34453	2.54689	3	0.3	715	ribonuclease T
C_RS12310	14.0891	-0.623435	0.443988	1	-0.672561	0.551222	0	0.1	716	DNA-3-methyladenine glycosylase 2
C_RS22760	5.72277	-0.868195	0.480742	0	0.887251	0.563975	0	0	717	nitrogen regulation protein NR(II)
C_RS07275	8.88911	-0.5207	0.281808	0	-1.10014	0.947797	1	0.1	718	phage N-6-adenine-methyltransferase
C_RS22890	11.7327	-0.837011	0.43286	0	-0.910115	0.527679	0	0	719	formate dehydrogenase cytochrome b556 subunit
C_RS19815	45.8158	-1.09084	0.77523	2	-0.228767	0.392862	0	0.2	720	Fe(2+) transporter permease subunit FeoB
C_RS04790	15.1525	-0.784885	0.41445	1	-0.49548	0.803895	0	0.1	721	DUF535 domain-containing protein
C_RS24710	5.97624	-0.933394	0.415672	1	0.430974	0.788173	0	0.1	722.5	EF-P beta-lysylation protein EpmB
C_RS14445	0.708911	-0.619439	0.298767	0	0.668265	1.55624	1	0.1	722.5	nucleoside-diphosphate kinase
C_RS22630	1.9901	-0.478497	0.206696	0	-1.66813	1.79266	1	0.1	724	NAD(P)H-flavin reductase
C_RS21185	10.4099	-0.554279	0.269951	0	-0.870842	1.19806	1	0.1	725	PRD domain-containing protein
C_RS20100	17.8277	-0.742892	0.589413	1	-0.516964	0.564917	0	0.1	726.5	high-affinity branched-chain amino acid ABC transporter permease LivH
C_RS07475	13.0416	-0.740904	0.427565	1	-0.519942	0.846411	0	0.1	726.5	iron/manganese ABC transporter ATP-binding protein SitB
C_RS08310	13.9604	-0.793489	0.558633	1	-0.480271	0.706181	0	0.1	728	phage shock protein operon transcriptional activator
C_RS20315	27.4079	-0.779539	0.517494	1	-0.492737	0.22938	0	0.1	729	oligopeptidase A
C_RS22185	0.918812	-0.282942	0.127524	0	-2.39829	1.46267	3	0.3	730	thioredoxin TrxA
C_RS07775	0.780198	-0.0137918	0.00970001	0	-1.21776	2.73767	4	0.4	731	ribose-phosphate diphosphokinase
C_RS04725	16.8832	-0.987888	0.405972	1	-0.411701	0.613004	0	0.1	732	lipoprotein
C_RS19105	21.1465	-0.755178	0.549744	1	-0.502468	0.483823	0	0.1	733	multidrug efflux RND transporter periplasmic adaptor subunit AcrE
C_RS15765	12.9881	-0.781938	0.348629	0	-0.981219	0.630126	0	0	734	sulfate adenylyltransferase subunit CysD
C_RS07600	5.21584	-0.557203	0.209756	0	-0.831527	1.19974	1	0.1	735	hypothetical protein
C_RS03205	14.8535	-0.880008	0.443949	1	-0.438954	0.334313	0	0.1	736	hydroxycarboxylate dehydrogenase HcxA
C_RS16420	17.5267	-0.852586	0.414616	0	-0.858855	0.772918	0	0	737	putative aminohydrolase SsnA
C_RS02555	6.41782	-0.518606	0.249102	0	-1.03717	0.952924	1	0.1	738	DNA-binding protein HU-beta
C_RS24900	3.8396	-0.379113	0.207458	0	-1.58703	1.11383	2	0.2	739	DUF350 domain-containing protein
C_RS03950	11.0634	-0.581665	0.401226	0	-0.723795	1.14684	1	0.1	740	galactose-1-phosphate uridylyltransferase
C_RS15380	1.98812	-0.362557	0.327594	0	-2.3004	1.91041	2	0.2	741	multidrug efflux transporter EmrAB transcriptional repressor EmrR
C_RS04010	12.0436	-0.770138	0.409696	1	-0.484989	0.957025	0	0.1	742	4-oxalomesaconate tautomerase
C_RS06070	16.8515	-0.810337	0.427235	0	-0.897346	0.574167	0	0	743	DUF4942 domain-containing protein
C_RS24845	17.0871	-0.602159	0.455832	1	-0.676392	0.486266	0	0.1	744	GTPase HflX
C_RS14190	2.51881	-0.383442	0.144683	0	-1.39265	1.18529	2	0.2	745	ethanolamine utilization microcompartment protein EutS
C_RS21455	28.8772	-0.95456	0.517456	2	-0.23265	0.743915	0	0.2	746	methionine adenosyltransferase
C_RS22805	12.2376	-0.575712	0.36855	0	-0.73405	0.983963	1	0.1	747	sulfolactaldehyde 3-reductase
C_RS03390	13.2911	-0.776466	0.593369	1	-0.479529	0.47222	0	0.1	748	adenosylcobalamin/alpha-ribazole phosphatase
C_RS04960	48.0871	-1.36287	0.684357	2	-0.204313	0.192597	0	0.2	749	ComEC family protein
C_RS01290	2.88911	-0.537429	0.277817	0	0.888855	1.08119	1	0.1	750	RadC family protein
C_RS13745	6.08911	-0.507614	0.0893729	0	-1.12074	0.739135	1	0.1	751	tyrosine-type recombinase/integrase
C_RS19850	34.7624	-0.837827	0.346017	1	-0.445643	0.310739	0	0.1	752	4-alpha-glucanotransferase
C_RS04560	6.55644	-0.60345	0.365768	0	-0.66631	0.981251	1	0.1	753	GPW/gp25 family protein
C_RS17685	6.4495	-0.750157	0.376395	0	-0.997622	0.754758	0	0	754	hydrogenase maturation nickel metallochaperone HypA
C_RS18075	19.3287	-0.95054	0.36412	0	-0.731339	0.278339	0	0	755	inorganic triphosphatase
C_RS14770	0.386139	-0.208312	0.0752348	0	-0.931209	2.41312	4	0.4	756	CDP-diacylglycerol--serine O-phosphatidyltransferase
C_RS13495	9.34257	-0.536422	0.207426	0	-0.881308	0.713278	1	0.1	757	glutathione transferase
C_RS18290	4.84356	-0.728564	0.323353	0	1.04991	0.437854	0	0	758	transcriptional regulator ExuR
C_RS09250	0.576238	-0.426791	0.10147	0	-0.780726	2.25625	2	0.2	759	hypothetical protein
C_RS19745	0.671287	-0.29277	0.0838532	0	-1.67667	1.60095	3	0.3	760	intracellular growth attenuator protein IgaA
C_RS13810	3.66733	-0.392141	0.222375	0	-1.15734	1.63603	2	0.2	761	lipoprotein
C_RS07095	7.18812	-0.665476	0.34209	0	-0.564016	1.02435	1	0.1	762	DUF4222 domain-containing protein
C_RS08490	13.7683	-0.687217	0.39709	1	-0.540078	1.01174	0	0.1	763	helix-turn-helix transcriptional regulator
C_RS02450	0.293069	-0.0137918	0.00970001	0	-1.11718	1.99912	4	0.4	764	1-deoxy-D-xylulose-5-phosphate synthase
C_RS01325	7.98614	-0.626674	0.287241	0	0.612811	1.47093	1	0.1	765	hypothetical protein
C_RS13285	29.5248	-0.883378	0.637882	1	-0.415073	0.747664	0	0.1	766	lipid IV(A) 4-amino-4-deoxy-L-arabinosyltransferase
C_RS09575	13.2851	-0.871258	0.281134	0	-0.763296	0.420032	0	0	767	glutathione transferase GstA
C_RS22160	34.7485	-1.00087	0.476018	1	-0.386797	0.223593	0	0.1	768	ketol-acid reductoisomerase
C_RS22655	2.90693	-0.476585	0.133375	0	-1.37202	1.11322	1	0.1	769	Trk system potassium transporter TrkH
C_RS02335	28.0693	-1.1148	0.599672	1	-0.366133	0.350268	0	0.1	770	exonuclease subunit SbcC
C_RS14860	25.3703	-0.959246	0.452782	1	-0.389495	0.711125	0	0.1	771	diguanylate cyclase DgcN
C_RS00630	1.17228	-0.370064	0.149715	0	-1.5818	2.01508	2	0.2	772	bacteriocin immunity protein
C_RS16410	3.65149	-0.418018	0.131858	0	-0.805905	1.60167	2	0.2	773	molybdenum cofactor cytidylyltransferase
C_RS11595	23.4535	-0.874842	0.443753	1	-0.409937	0.847312	0	0.1	774	HTH-type transcriptional regulator Cbl
C_RS06285	0.930693	-0.436566	0.223556	0	-0.695899	2.22434	2	0.2	775	anti-sigma-28 factor FlgM
C_RS19925	1.23762	-0.454973	0.228403	0	-0.62507	2.36639	2	0.2	776	type 1 fimbrial protein
C_RS22895	12.6218	-0.60805	0.474272	0	-0.619922	1.15912	1	0.1	777	formate dehydrogenase O subunit beta
C_RS09275	26.8119	-1.09725	0.55177	1	-0.364129	0.332703	0	0.1	778	mannitol dehydrogenase family protein
C_RS08710	11.5327	-0.809545	0.627749	1	-0.433905	0.939307	0	0.1	779	tellurite resistance methyltransferase TehB
C_RS29625	5.15446	-0.478123	0.240847	0	-1.26229	0.923854	1	0.1	780	hypothetical protein
C_RS13775	4.65743	-0.533136	0.336352	0	-0.824116	1.46362	1	0.1	781	acid-sensing system DNA-binding response regulator EvgA
C_RS21095	12.5287	-0.598671	0.262632	0	-0.632265	1.05013	1	0.1	782	DNA damage-inducible protein D
C_RS13980	15.1485	-0.917048	0.490967	1	-0.390498	0.657653	0	0.1	783.5	LysR family transcriptional regulator
C_RS25180	20.4396	-0.789028	0.596626	1	-0.44298	0.752267	0	0.1	783.5	metalloprotease PmbA
C_RS22155	10.3723	-0.541497	0.272637	0	-0.771385	1.12687	1	0.1	785	HTH-type transcriptional activator IlvY
C_RS02215	102.424	-1.36222	0.83828	3	-0.0542768	0.321802	0	0.3	786	autotransporter outer membrane beta-barrel domain-containing protein
C_RS15265	11.9327	-0.594808	0.43026	0	-0.635061	1.22401	1	0.1	787	4-aminobutyrate--2-oxoglutarate transaminase
C_RS20730	32.1446	-0.878886	0.480191	1	-0.400298	0.235501	0	0.1	788	D-xylose ABC transporter ATP-binding protein
C_RS28965	2.21782	-0.364376	0.268143	0	-1.63487	2.64079	2	0.2	789	hypothetical protein
C_RS10935	28.6257	-0.966675	0.516653	1	-0.376813	0.819348	0	0.1	790	alpha,alpha-trehalose-phosphate synthase
C_RS26245	2.03762	-0.299893	0.135197	0	-1.28569	2.35694	3	0.3	791	tail fiber assembly protein
C_RS09375	1.29109	-0.280432	0.146625	0	-1.73611	1.81929	3	0.3	792	hypothetical protein
C_RS25450	10.8455	-0.45862	0.241044	0	1.54349	3.75959	1	0.1	793	type 1 fimbria regulatory protein FimE
C_RS22625	0.952475	-0.254585	0.0831862	0	-2.61795	1.81415	3	0.3	794	4-hydroxy-3-polyprenylbenzoate decarboxylase
C_RS14030	17.7782	-0.924763	0.354875	1	-0.385761	0.205341	0	0.1	795	pyridoxine/pyridoxal/pyridoxamine kinase
C_RS09920	23.2238	-0.855771	0.436603	1	0.408276	0.98719	0	0.1	796	phosphoenolpyruvate synthase
C_RS09075	3.64356	-0.542945	0.325128	0	0.416159	2.18683	2	0.2	797	type 1 fimbrial protein
C_RS11435	1.3604	-0.261351	0.148867	0	-2.33504	2.42878	3	0.3	798	hypothetical protein
C_RS27020	2.61584	-0.373093	0.170316	0	-1.36514	2.33378	2	0.2	799	hypothetical protein
C_RS00015	44.8	-1.01841	0.420083	1	-0.366344	0.339697	0	0.1	800	bifunctional aspartate kinase/homoserine dehydrogenase I
C_RS09855	27.8079	-1.08693	0.679235	2	-0.197495	0.478466	0	0.2	801	MFS transporter
C_RS14280	16.6238	-0.888156	0.398172	1	-0.394664	0.50927	0	0.1	802	outer membrane protein assembly factor BamC
C_RS22235	10.4851	-0.678033	0.269216	0	-1.08339	0.570529	0	0	803	dTDP-4-amino-4,6-dideoxy-D-galactose acyltransferase
C_RS16540	32.1644	-0.999744	0.52847	1	-0.367126	0.281883	0	0.1	804	6-phospho-beta-glucosidase BglA
C_RS21675	1.9505	-0.350759	0.220902	0	-2.1786	1.95505	2	0.2	805	ilvB operon leader peptide IvbL
C_RS10855	0.156436	-0.369147	0.317224	0	1.41964	2.00448	2	0.2	806	flagellar protein FlhE
C_RS29580	8.23564	-0.727479	0.631303	1	-0.271743	1.42112	1	0.2	807.5	YtjB family periplasmic protein
C_RS08780	1.62376	-0.376647	0.178739	0	-1.24603	1.78231	2	0.2	807.5	orphan toxin OrtT
C_RS00940	0.255446	-0.0137918	0.00970001	0	-0.978763	2.51822	4	0.4	809	type I methionyl aminopeptidase
C_RS04805	4.64158	-0.520051	0.358986	0	-0.873989	1.20136	1	0.1	810	cold shock-like protein CspD
C_RS12985	1.25149	-0.24232	0.150702	0	-2.90974	2.11812	3	0.3	811	heme exporter protein CcmD
C_RS24185	6.17228	-0.49685	0.37256	0	-1.01276	1.14489	1	0.1	812	phnA family protein
C_RS02205	16.2455	-0.823487	0.299541	0	-0.746211	0.477021	0	0	813	taurine dioxygenase
C_RS08920	23.505	-0.809805	0.262786	0	-0.76066	0.206357	0	0	814	nitrate reductase subunit beta
C_RS15210	14.8614	-0.727918	0.314657	0	-0.910539	0.372011	0	0	815	hypothetical protein
C_RS22390	2.50891	-0.432213	0.0775999	0	-2.12214	1.71157	1	0.1	816	DUF943 family protein
C_RS16710	2.48317	-0.868167	0.385338	1	-0.394046	0.73334	0	0.1	817	transketolase
C_RS09145	34.9525	-0.998348	0.219546	1	-0.362592	0.384983	0	0.1	818	GGDEF domain-containing protein
C_RS14005	14.9782	-0.724166	0.440165	1	-0.467213	0.814118	0	0.1	819	sulfate transporter CysZ
C_RS13430	24.8792	-1.09007	0.273045	1	-0.351182	0.214251	0	0.1	820	transcriptional regulator LrhA
C_RS22840	19.7287	-0.787731	0.189373	0	-0.793035	0.150936	0	0	821	virulence factor BrkB family protein
C_RS19630	2.52277	-0.29693	0.0845093	0	-1.24671	1.43167	3	0.3	822	YhfL family protein
C_RS11155	22.3644	-0.789944	0.428936	1	-0.424584	0.477624	0	0.1	823	flagellar M-ring protein FliF
C_RS07465	17.3426	-0.645884	0.569669	1	-0.534682	0.725585	0	0.1	824	iron/manganese ABC transporter permease subunit SitD
C_RS13675	52.9604	-1.15045	0.57267	2	-0.18661	0.126587	0	0.2	825	fimbrial biogenesis outer membrane usher protein
C_RS22230	6.59802	-0.479393	0.207595	0	-1.14364	0.859692	1	0.1	826	glucose-1-phosphate thymidylyltransferase RfbA
C_RS06560	24.3663	-0.827086	0.552429	1	-0.406046	0.646029	0	0.1	827	phage integrase Arm DNA-binding domain-containing protein
C_RS06540	16.3426	-0.573261	0.490295	1	-0.365401	1.25496	1	0.2	828	TPM domain-containing protein
C_RS10480	8.53663	-0.48872	0.285498	0	-1.03899	0.874418	1	0.1	829	DUF1889 family protein
C_RS11380	3.24356	-0.528333	0.256403	0	-0.426111	1.94024	2	0.2	830	hypothetical protein
C_RS07805	12.9545	-0.702412	0.526994	1	-0.474223	0.878654	0	0.1	831	SirB family protein
C_RS19220	2.66733	-0.498064	0.190515	0	-0.97088	1.78028	1	0.1	832	Trk system potassium transporter TrkA
C_RS06335	16.2475	-0.829914	0.378558	0	-0.719679	0.569467	0	0	833	flagellar assembly peptidoglycan hydrolase FlgJ
C_RS29560	11.604	-0.738907	0.167299	0	-0.858661	0.30825	0	0	834	DUF2238 domain-containing protein
C_RS17280	5.20396	-0.597843	0.544403	1	0.594641	0.568455	0	0.1	835	N-acetylneuraminate lyase
C_RS04100	3.97822	-0.489248	0.322041	0	-0.494185	1.83164	2	0.2	836	molybdopterin synthase catalytic subunit MoaE
C_RS22025	24.5921	-0.869871	0.39657	1	-0.380409	0.340709	0	0.1	837	ATPase RavA stimulator ViaA
C_RS08585	41.8752	-0.988332	0.413965	1	-0.354366	0.379194	0	0.1	838	YdbH family protein
C_RS00740	17.2317	-0.904579	0.727897	1	-0.367517	0.993718	0	0.1	839	ABC transporter permease
C_RS29695	2.07921	-0.375185	0.0889208	0	-1.15323	2.63407	2	0.2	840	hypothetical protein
C_RS11675	105.212	-1.73446	0.952724	3	-0.0323476	0.265066	0	0.3	841	colibactin non-ribosomal peptide synthetase ClbH
C_RS04850	0.956436	-0.348719	0.112552	0	-1.93768	1.59876	2	0.2	842	thioredoxin-disulfide reductase
C_RS11865	2.75248	-0.364941	0.217216	0	-1.31678	1.20218	2	0.2	843	hypothetical protein
C_RS01485	11.295	-0.49362	0.309164	0	-0.945845	0.840817	1	0.1	844	MFS transporter
C_RS01850	44.8594	-1.03717	0.588371	2	-0.186133	0.330877	0	0.2	845	fimbrial usher EcpC
C_RS16310	16.8634	-0.702159	0.341007	0	-0.895888	0.38042	0	0	846	DNA-binding transcriptional regulator LysR
C_RS22690	7.86139	-0.650684	0.353935	0	-1.0346	0.642758	0	0	847	molybdopterin-guanine dinucleotide biosynthesis protein B
C_RS28675	2.94653	-0.456899	0.284571	0	-1.2682	2.18021	1	0.1	848	AlpA family phage regulatory protein
C_RS20750	34.2099	-0.775315	0.465676	1	-0.413948	0.36057	0	0.1	849.5	alpha-amylase
C_RS17425	5.76436	-0.505399	0.305604	0	-0.878106	1.04552	1	0.1	849.5	DUF987 domain-containing protein
C_RS09985	0.291089	-0.253671	0.0161999	0	-1.96601	0.363959	3	0.3	851	phenylalanine--tRNA ligase subunit alpha
C_RS21145	25.101	-0.940405	0.42078	1	-0.355614	0.570101	0	0.1	852	AsmA family protein
C_RS12540	69.2317	-1.18873	0.534541	2	-0.171575	0.153485	0	0.2	853	WGR and DUF4132 domain-containing protein
C_RS04055	12.8139	-0.888216	0.273765	0	-0.648426	0.688302	0	0	854	malonyl-ACP O-methyltransferase BioC
C_RS18030	16.3149	-0.492467	0.263672	0	-0.929584	0.719583	1	0.1	855	pilus protein
C_RS20155	7.90495	-0.530074	0.445049	1	-0.402937	1.28086	1	0.2	856	DUF2500 domain-containing protein
C_RS27760	2.82772	-0.35702	0.159609	0	-1.47366	2.34867	2	0.2	857	hypothetical protein
C_RS14630	15.7208	-0.792141	0.510382	1	-0.398938	0.597534	0	0.1	858	MurR/RpiR family transcriptional regulator
C_RS09885	13.5644	-0.816704	0.601683	1	-0.386565	0.504082	0	0.1	859	AraC family transcriptional regulator
C_RS18775	1.10099	-0.22618	0.100011	0	-2.39217	1.98079	3	0.3	860	lipopolysaccharide ABC transporter substrate-binding protein LptA
C_RS01585	0.942574	-0.368565	0.153647	0	-1.17435	1.53876	2	0.2	861	hypothetical protein
C_RS25635	12.4792	-0.683474	0.138358	0	-0.900144	0.451648	0	0	862	GTPase
C_RS17650	11.3861	-0.714524	0.453602	0	-0.84329	0.955799	0	0	863	ATP-binding protein
C_RS18680	0.550495	-0.237973	0.0726105	0	-2.1236	1.41655	3	0.3	864	transcription elongation factor GreA
C_RS08505	9.01782	-0.714629	0.18046	0	-0.837737	0.270182	0	0	865	DNA endonuclease SmrA
C_RS07700	16.004	-0.67725	0.469942	1	-0.467174	0.383	0	0.1	866	ModD protein
C_RS19460	2.93069	-0.355255	0.242652	0	-1.4748	2.42347	2	0.2	867	bacterioferritin-associated ferredoxin
C_RS18975	0.70297	-0.206763	0.0710893	0	-2.65215	0.958043	3	0.3	868	rod shape-determining protein MreD
C_RS04950	0.291089	-0.250821	0.0229717	0	-1.85047	0.665222	3	0.3	869	30S ribosomal protein S1
C_RS04060	14.3881	-0.624211	0.486297	1	-0.519361	0.792316	0	0.1	870	ATP-dependent dethiobiotin synthetase BioD
C_RS13375	0.960396	-0.240156	0.0279522	0	-2.02818	0.882631	3	0.3	871	NADH-quinone oxidoreductase subunit L
C_RS07915	27.4931	-0.764845	0.543459	1	-0.403358	0.484502	0	0.1	872.5	sterol desaturase family protein
C_RS03250	5.80396	-0.458284	0.2784	0	-1.15987	1.31879	1	0.1	872.5	nucleoside diphosphate kinase regulator
C_RS12100	8.74653	-0.752245	0.230789	0	-0.736496	0.397414	0	0	874	imidazole glycerol phosphate synthase subunit HisH
C_RS06975	3.15446	-0.421206	0.114969	0	-0.367628	2.46998	3	0.3	875	hypothetical protein
C_RS03525	15.6911	-0.559823	0.485981	1	-0.623876	0.886149	0	0.1	876	DNA-binding transcriptional regulator NagC
C_RS23410	1.48119	-0.337124	0.222836	0	-2.1578	2.38977	2	0.2	877	DNA-directed RNA polymerase subunit beta'
C_RS23835	44.505	-0.592429	0.432636	1	-0.561917	0.453369	0	0.1	878	2-oxoglutarate dehydrogenase E1 component
C_RS25995	2.47723	-0.346748	0.10109	0	-1.69123	2.20073	2	0.2	879	hypothetical protein
C_RS22570	18.2337	-0.430222	0.261032	0	1.60728	3.69497	1	0.1	880	2-dehydro-3-deoxygalactonokinase
C_RS23340	0.522772	-0.232091	0.059698	0	-2.02316	1.44012	3	0.3	881	type I pantothenate kinase
C_RS23850	19.7941	-0.755447	0.183317	0	-0.725998	0.404496	0	0	882	ADP-forming succinate--CoA ligase subunit beta
C_RS20975	0.906931	-0.167854	0.109469	0	-2.73284	2.70722	3	0.3	883	ADP-glyceromanno-heptose 6-epimerase
C_RS02705	5.60594	-0.474594	0.31554	0	-0.979351	1.94549	1	0.1	884	adenine phosphoribosyltransferase
C_RS29375	1.2099	-0.232033	0.169202	0	-2.004	2.39312	3	0.3	885	rpoE leader peptide RseD
C_RS19040	15.5762	-0.788645	0.397324	0	-0.691946	1.01591	0	0	886.5	sugar ABC transporter ATP-binding protein
C_RS04890	13.4059	-0.687764	0.24201	0	-0.854361	0.333719	0	0	886.5	dimethyl sulfoxide reductase anchor subunit DmsC
C_RS06325	16.5208	-0.619359	0.473319	1	-0.510686	0.557885	0	0.1	888	flagellar basal body L-ring protein FlgH
C_RS11370	2.70693	-0.384152	0.157162	0	-0.899747	2.03776	2	0.2	889	TIR domain-containing protein
C_RS12875	18.0495	-0.681027	0.417007	0	-0.871107	0.697315	0	0	890	microcin C ABC transporter permease YejB
C_RS28985	0.605941	-0.202818	0.0625863	0	-2.39717	1.27913	3	0.3	891	protein YadW
C_RS16980	2.1901	-0.34341	0.0691716	0	-1.72715	2.40643	2	0.2	892	IS66 family insertion sequence element accessoryprotein TnpB
C_RS08970	19.0337	-0.661207	0.690136	1	-0.462041	0.721943	0	0.1	893	alcohol dehydrogenase AdhP
C_RS17660	8.70297	-0.550863	0.460691	1	-0.626054	0.741654	0	0.1	894.5	thymidylate kinase
C_RS00375	6.30891	-0.500583	0.335946	0	-0.814961	1.5595	1	0.1	894.5	thiamine ABC transporter ATP-binding protein ThiQ
C_RS06890	4.5703	-0.522235	0.245939	0	-0.708657	1.29357	1	0.1	896	hypothetical protein
C_RS22720	26.3267	-0.846321	0.57863	2	-0.198613	0.880964	0	0.2	897	acyltransferase
C_RS23805	1.37228	-0.139531	0.0535724	0	-2.72874	1.78802	3	0.3	898	replicative DNA helicase
C_RS11305	9.61584	-0.525545	0.305024	0	-0.698336	1.21529	1	0.1	899	response regulator transcription factor HprR
C_RS00245	17.1703	-0.576429	0.54471	1	0.575601	0.291264	0	0.1	900.5	FAD-dependent oxidoreductase
C_RS24545	8.65545	-0.492266	0.446459	0	-0.859562	2.11915	1	0.1	900.5	hypothetical protein
C_RS11135	11.103	-0.590286	0.585547	1	-0.317096	1.18347	1	0.2	902	Raf kinase inhibitor-like protein YbcL
C_RS23905	3.21386	-0.471587	0.448043	0	-0.963561	3.01546	1	0.1	903	YjcB family protein
C_RS07585	1.76436	-0.33763	0.232167	0	-1.96869	2.0497	2	0.2	904	cell division topological specificity factor MinE
C_RS09155	15.1762	-0.746603	0.574328	1	-0.402518	0.471738	0	0.1	905	glutaminase B
C_RS15230	3.14455	-0.39008	0.0827175	0	-0.833466	2.13754	2	0.2	906	hypothetical protein
C_RS04435	4.25743	-0.429936	0.314875	0	-1.52845	2.54377	1	0.1	907	phage regulatory CII family protein
C_RS02925	15.0713	-0.828919	0.346956	1	-0.362554	0.660739	0	0.1	908	DUF1116 domain-containing protein
C_RS12250	11.7406	-0.72328	0.275692	0	-0.755256	0.666803	0	0	909	putative colanic acid polymerase WcaD
C_RS21535	3.36832	-0.44256	0.268086	0	-1.26241	1.54138	1	0.1	910	DUF905 family protein
C_RS00525	0.534653	-0.259105	0.104942	0	-1.47768	1.79542	3	0.3	911	cell division protein FtsZ
C_RS08745	30.5347	-0.945723	0.366931	1	-0.330408	0.355054	0	0.1	912	PLP-dependent aminotransferase family protein
C_RS20420	2.01584	-0.342013	0.0978182	0	-1.70993	2.72354	2	0.2	913	acid resistance transcriptional activator GadE
C_RS25880	3.0396	-0.405195	0.162554	0	-0.69945	1.96201	2	0.2	914	helix-turn-helix domain-containing protein
C_RS15700	6.49109	-0.477158	0.280281	0	-0.925736	0.911547	1	0.1	915	MBL fold metallo-hydrolase
C_RS01215	19.8495	-0.728769	0.439423	1	-0.40717	0.357351	0	0.1	916	IS66 family transposase
C_RS25510	17.2594	-0.810496	0.601669	2	-0.201877	0.755838	0	0.2	917	fructuronate reductase
C_RS17045	3.48911	-0.429004	0.136924	0	-1.499	1.10915	1	0.1	918	major pilus subunit operon regulatory protein PapB
C_RS03420	16.5743	-1.08221	0.197276	0	-0.53693	0.599079	0	0	919	pyrimidine-specific ribonucleoside hydrolase RihA
C_RS08975	27.4178	-1.01875	0.311975	1	-0.31581	0.590485	0	0.1	920	malate dehydrogenase
C_RS23965	17.5723	-0.540862	0.504161	1	-0.634582	0.411958	0	0.1	921	ammonia-forming nitrite reductase cytochrome c552 subunit
C_RS18460	14.7089	-0.593334	0.479818	1	-0.53504	0.650817	0	0.1	922	PTS mannose/fructose/sorbose transporter family subunit IID
C_RS04630	35.0871	-0.907932	0.56415	2	-0.177778	0.740524	0	0.2	923	aspartate:alanine antiporter
C_RS03370	0.720792	-0.0529746	0.0883148	0	-2.68467	2.07168	3	0.3	924	peptidoglycan glycosyltransferase MrdB
C_RS00100	33.2436	-0.934107	0.529717	1	-0.327618	0.332209	0	0.1	925	sulfatase-like hydrolase/transferase
C_RS02430	0.50099	-0.213039	0.0428291	0	-1.99659	1.37145	3	0.3	926	transcription antitermination factor NusB
C_RS13690	36.2277	-1.02544	0.53474	2	-0.163659	0.569181	0	0.2	927	fatty acid oxidation complex subunit alpha FadJ
C_RS14635	7.35248	-0.49072	0.488363	1	-0.441265	0.953959	1	0.2	928	4Fe-4S dicluster ferredoxin YfhL
C_RS29045	14.4495	-0.635886	0.458296	0	-0.930801	0.917177	0	0	929	hypothetical protein
C_RS12475	14.9267	-0.744687	0.4825	1	-0.394245	0.242771	0	0.1	930	bifunctional hydroxymethylpyrimidine kinase/phosphomethylpyrimidine kinase
C_RS05630	1.67723	-0.380884	0.220366	0	-0.879559	3.14628	2	0.2	931	acyl carrier protein
C_RS23620	1.70495	-0.212665	0.0914291	0	-1.94854	2.12936	3	0.3	932	PTS sorbose IIA component
C_RS03135	48.2713	-1.03583	0.590941	1	-0.30734	0.437051	0	0.1	933	enterobactin non-ribosomal peptide synthetase EntF
C_RS11555	40.1683	-1.25608	0.752349	1	-0.287046	0.135258	0	0.1	934	Ig-like domain-containing protein
C_RS11745	15.1564	-0.695402	0.589105	1	-0.41721	0.842592	0	0.1	935	adenosylcobinamide-GDP ribazoletransferase
C_RS15740	0.869307	-0.0137918	0.00970001	0	-3.07507	1.68874	3	0.3	936	2-C-methyl-D-erythritol 4-phosphate cytidylyltransferase
C_RS03085	3.68515	-0.434664	0.151147	0	-1.27716	1.77922	1	0.1	937	DUF1158 domain-containing protein
C_RS20585	12.9129	-0.630441	0.260134	0	-0.926478	0.588072	0	0	938	dipeptide ABC transporter ATP binding subunit DppF
C_RS20140	0.772277	-0.0238555	0.0189472	0	-2.55626	1.19394	3	0.3	939	signal recognition particle-docking protein FtsY
C_RS12295	1.1703	-0.253437	0.0614217	0	-1.39565	1.7637	3	0.3	940	dCTP deaminase
C_RS00085	1.49901	-0.344818	0.0835777	0	-1.44557	0.930631	2	0.2	941	molecular chaperone DnaJ
C_RS23570	52.3822	-1.08197	0.769911	2	-0.150854	0.503085	0	0.2	942	methionine synthase
C_RS19735	48.0752	-0.789051	0.494183	1	0.362316	0.26736	0	0.1	943	peptidoglycan glycosyltransferase/peptidoglycan DD-transpeptidase MrcA
C_RS10530	19.2198	-0.777715	0.416102	1	-0.366389	0.677342	0	0.1	944	PTS mannose transporter subunit IID
C_RS14915	24.5921	-0.888229	0.619372	1	-0.327724	0.522099	0	0.1	945	DNA repair protein RecN
C_RS07330	3.28911	-0.607583	0.374341	0	0.990245	0.547428	0	0	946	increased serum survival lipoprotein Iss
C_RS16180	3.00198	-0.363807	0.0976399	0	-1.02072	1.45791	2	0.2	947	PRD domain-containing protein
C_RS07725	24.9129	-0.886711	0.207187	0	-0.572898	0.145612	0	0	948	alpha,alpha-trehalase
C_RS05780	2.48317	-0.427708	0.262918	0	-1.36511	2.41561	1	0.1	949	CPBP family intramembrane metalloprotease
C_RS00275	0.538614	-0.217153	0.0664185	0	-1.74212	1.8949	3	0.3	950	type II toxin-antitoxin system CcdA family antitoxin
C_RS29690	2.88515	-0.439734	0.281438	0	-1.16828	2.09206	1	0.1	951	integrase
C_RS24050	31	-0.656806	0.497417	1	-0.439746	0.578265	0	0.1	952	multidrug efflux transporter permease subunit MdtO
C_RS22425	13.3881	-0.737678	0.447705	0	-0.683901	0.968879	0	0	953.5	homoserine/homoserine lactone efflux protein
C_RS03255	10.7485	-0.717157	0.300483	0	-0.710051	0.790479	0	0	953.5	ribonuclease I
C_RS28500	0.411881	-0.21727	0.0494473	0	-1.71718	1.59631	3	0.3	955	prophage lysis lipoprotein RzoD
C_RS07090	1.95446	-0.330149	0.107502	0	-1.94089	2.25771	2	0.2	956	hypothetical protein
C_RS02665	58.4752	-1.50298	0.723534	3	-0.00281324	0.226358	0	0.3	957	multidrug efflux RND transporter permease subunit
C_RS24770	29.2198	-0.691284	0.530536	1	-0.410361	0.184982	0	0.1	958.5	glutamate/gamma-aminobutyrate family transporterYjeM
C_RS03435	14.602	-0.625786	0.505467	1	-0.466481	0.893818	0	0.1	958.5	glutamate/aspartate ABC transporter permease GltJ
C_RS14755	4.40198	-0.427941	0.227626	0	-1.33551	0.858375	1	0.1	960	thioredoxin TrxC
C_RS21765	15.4436	-0.830656	0.435565	1	-0.343337	0.589877	0	0.1	961	2-dehydro-3-deoxygalactonokinase
C_RS10320	7.77624	-0.686263	0.324318	0	-0.750198	0.641104	0	0	962	YeaC family protein
C_RS04705	15.5426	-0.732424	0.572561	1	-0.384903	0.629678	0	0.1	963	arginine ABC transporter permease ArtM
C_RS00640	2.37228	-0.349949	0.123517	0	-1.23312	1.56153	2	0.2	964	bacteriocin immunity protein
C_RS00935	0.80396	-0.612832	0.386372	0	-0.477029	1.77854	1	0.1	965	bifunctional uridylyltransferase/uridylyl-removing protein GlnD
C_RS04170	23.4891	-0.815398	0.271101	0	-0.607585	0.302798	0	0	966	ATP-dependent DNA helicase DinG
C_RS20635	24.7683	-0.770587	0.457475	0	-0.644531	0.53074	0	0	967	autotransporter outer membrane beta-barrel domain-containing protein
C_RS14620	0.615842	-0.23811	0.0936086	0	-1.50111	1.85032	3	0.3	968	tRNA adenosine(34) deaminase TadA
C_RS24605	2.45149	-0.480019	0.171206	0	-0.825435	1.76211	1	0.1	969	PerC family transcriptional regulator
C_RS01830	10.5842	-0.498699	0.311962	0	-0.728615	1.1276	1	0.1	970	YagU family protein
C_RS20875	4.94851	-0.406594	0.0421932	0	-1.7985	1.11381	1	0.1	971	transcriptional repressor MtlR
C_RS13540	0.760396	-0.0137918	0.00970001	0	-2.53604	1.99698	3	0.3	972	flavin prenyltransferase UbiX
C_RS01550	30.2059	-1.03675	0.462575	2	-0.1474	0.400717	0	0.2	973	PTS ascorbate transporter subunit IIC
C_RS00615	20.9327	-0.949646	0.302031	1	-0.304935	0.252239	0	0.1	974	beta-lactamase regulator AmpE
C_RS18240	15.6634	-0.625346	0.230489	0	-0.88789	0.464462	0	0	975	23S rRNA (guanine(1835)-N(2))-methyltransferase RlmG
C_RS29520	0.625743	-0.181472	0.0843906	0	-1.79836	1.91185	3	0.3	976	type I toxin-antitoxin system toxin Ldr family protein
C_RS03815	0.324752	-0.0418865	0.0580214	0	-2.102	0.381105	3	0.3	977	cytochrome ubiquinol oxidase subunit I
C_RS08335	4.91683	-0.57941	0.373677	0	-1.09224	0.758871	0	0	978	thiosulfate sulfurtransferase PspE
C_RS21395	0.990099	-0.552425	0.226387	0	-0.565073	2.03498	1	0.1	979	propanediol utilization microcompartment proteinPduA
C_RS06990	4.29307	-0.486517	0.0972629	0	-0.760674	1.02249	1	0.1	980	hypothetical protein
C_RS29805	0.536634	-0.22472	0.0597111	0	-1.52502	2.07363	3	0.3	981	hypothetical protein
C_RS18190	5.51485	-0.594713	0.246298	0	-0.993342	0.542802	0	0	982	tRNA-binding protein
C_RS02965	0.881188	-0.234938	0.143551	0	-1.44578	2.56963	3	0.3	983	cysteine--tRNA ligase
C_RS08930	17.8436	-0.790108	0.568076	1	-0.347782	0.876267	0	0.1	984	nitrate/nitrite transporter NarU
C_RS03145	1.73663	-0.693586	0.233196	0	0.709778	0.939395	0	0	985.5	iron-enterobactin ABC transporter ATP-binding protein
C_RS02320	8.62376	-0.574435	0.179755	0	-1.11138	0.474071	0	0	985.5	recombination-associated protein RdgC
C_RS13930	0.360396	-0.0363634	0.0594966	0	-2.09124	0.352418	3	0.3	987	glutamate--tRNA ligase
C_RS07710	10.9267	-0.750512	0.407862	0	-0.645809	0.833998	0	0	988	ABC transporter ATP-binding protein
C_RS16940	2.79802	-0.37274	0.153822	0	-0.871552	2.29692	2	0.2	989	hypothetical protein
C_RS12510	2.87129	-0.371113	0.18519	0	-0.881258	1.84561	2	0.2	990	fimbria/pilus periplasmic chaperone
C_RS09620	13.6713	-0.891732	0.795533	1	-0.313474	0.915356	0	0.1	991	HlyD family secretion protein
C_RS25845	21.4297	-0.86082	0.663653	1	-0.320885	0.434238	0	0.1	992	type II toxin-antitoxin system HipA family toxinYjjJ
C_RS16870	38.8356	-0.96086	0.471743	1	-0.295277	0.320003	0	0.1	993	ornithine decarboxylase
C_RS22345	1.1802	-0.11298	0.0806911	0	-1.87807	2.62736	3	0.3	994	diaminopimelate epimerase
C_RS16470	1.92277	-0.432523	0.181787	0	-1.1489	2.451	1	0.1	995	hypothetical protein
C_RS25675	27.0772	-0.956155	0.784624	2	-0.149834	0.317863	0	0.2	996	Na+/H+ antiporter
C_RS13370	1.0198	-0.380799	0.198105	0	-0.771815	1.57791	2	0.2	997	NADH-quinone oxidoreductase subunit M
C_RS03130	0.469307	-0.305949	0.121624	0	-0.760874	2.11108	3	0.3	998	enterobactin biosynthesis protein YbdZ
C_RS23560	29.1901	-0.689433	0.424332	1	-0.395154	0.448229	0	0.1	999	bifunctional isocitrate dehydrogenase kinase/phosphatase
C_RS13115	9.31683	-0.624029	0.372051	0	-0.448427	1.20452	1	0.1	1000	succinyl-CoA--3-ketoacid-CoA transferase
C_RS01115	0.285149	-0.0435638	0.0666013	0	-1.95746	0.539853	3	0.3	1001	D-glycero-beta-D-manno-heptose 1,7-bisphosphate 7-phosphatase
C_RS14470	10.7663	-0.561857	0.319915	0	-1.15658	0.70693	0	0	1002	aminopeptidase PepB
C_RS16610	26.0614	-0.895386	0.82834	1	-0.306623	0.71011	0	0.1	1003	methylmalonyl-CoA mutase
C_RS13905	47.4515	-1.09933	0.499545	2	-0.134408	0.735087	0	0.2	1004	sensor domain-containing phosphodiesterase
C_RS05900	5.64554	-0.489553	0.286768	0	-0.728319	1.2552	1	0.1	1005	IS4 family transposase
C_RS14580	1.3802	-0.332904	0.203038	0	-1.55838	1.96063	2	0.2	1006	serine hydroxymethyltransferase
C_RS04740	22.8832	-0.729872	0.387941	0	-0.650024	0.411981	0	0	1007	NAD(P)-dependent oxidoreductase
C_RS13425	1.09505	-0.212783	0.0950665	0	-1.48972	1.98324	3	0.3	1008	NADH-quinone oxidoreductase subunit NuoA
C_RS18220	42.8653	-0.853997	0.419826	1	-0.316354	0.344693	0	0.1	1009	alpha-glucosidase
C_RS08300	3.40198	-0.418082	0.282937	0	1.30636	0.693023	1	0.1	1010	YmjA family protein
C_RS16210	1.68713	-0.405243	0.204995	0	-1.63755	1.86596	1	0.1	1011	exodeoxyribonuclease V subunit gamma
C_RS19435	21.705	-0.739965	0.324823	0	-0.633969	0.612113	0	0	1012	type II secretion system minor pseudopilin GspK
C_RS03355	0.657426	-0.0137918	0.00970001	0	-2.08368	2.44468	3	0.3	1013	YbeD family protein
C_RS22395	1.74059	-0.405295	0.216034	0	-1.61749	1.86449	1	0.1	1014	DUF3289 family protein
C_RS04475	0.277228	-0.0137918	0.00970001	0	-2.04764	0.320271	3	0.3	1015	hypothetical protein
C_RS14305	21.8891	-1.02794	0.42497	1	-0.279566	0.340304	0	0.1	1016	beta-barrel assembly-enhancing protease
C_RS19570	0.362376	-0.0947474	0.178239	0	-1.73404	1.17469	3	0.3	1017.5	cAMP-activated global transcriptional regulator CRP
C_RS02955	0.281188	-0.0137918	0.00970001	0	-2.0424	0.30223	3	0.3	1017.5	UDP-2,3-diacylglucosamine diphosphatase
C_RS14960	1.2297	-0.105288	0.136091	0	-1.7193	3.51698	3	0.3	1019	tail fiber assembly protein
C_RS16200	1.70495	-0.318923	0.127627	0	-2.0397	2.03706	2	0.2	1020	exodeoxyribonuclease V subunit beta
C_RS29285	0.128713	-0.165803	0.250169	0	1.64662	2.31632	3	0.3	1021	hypothetical protein
C_RS04420	2.21386	-0.59506	0.375386	0	0.129492	2.17693	3	0.3	1022	hypothetical protein
C_RS00760	20.3188	-0.711103	0.175423	0	-0.65955	0.0412977	0	0	1023	Rpn family recombination-promoting nuclease/putative transposase
C_RS05310	33.9386	-0.870919	0.440468	1	-0.303521	0.456937	0	0.1	1024	TMAO reductase system sensor histidine kinase/response regulator TorS
C_RS24620	3.74455	-0.407253	0.22672	0	-1.48552	2.49373	1	0.1	1025	hypothetical protein
C_RS24035	30.299	-0.771682	0.457734	0	-0.593928	0.487254	0	0	1026	formate dehydrogenase H subunit alpha, selenocysteine-containing
C_RS14015	0.265347	-0.0137918	0.00970001	0	-1.96916	0.270571	3	0.3	1027	phosphocarrier protein Hpr
C_RS17590	19.7366	-0.94684	0.245189	1	-0.285426	0.247554	0	0.1	1028	glycolate oxidase subunit GlcD
C_RS03690	1.45743	-0.320763	0.212616	0	-1.88118	2.52275	2	0.2	1029	K(+)-transporting ATPase subunit F
C_RS10325	7.98614	-0.670716	0.313844	0	-0.702635	0.645583	0	0	1030	peptide-methionine (R)-S-oxide reductase MsrB
C_RS20985	0.261386	-0.0137918	0.00970001	0	-1.96264	0.162121	3	0.3	1031	lipopolysaccharide heptosyltransferase RfaC
C_RS00785	5.52673	-0.592541	0.234501	0	-0.924016	1.12548	0	0	1032	fimbrial protein
C_RS13445	35.2	-1.09791	0.589239	2	-0.125183	0.472123	0	0.2	1033	SLC13 family permease
C_RS29775	3.09505	-0.357449	0.210443	0	-0.933192	1.55127	2	0.2	1034	hypothetical protein
C_RS17525	1.32277	-0.403537	0.284025	0	-1.55583	1.97121	1	0.1	1035	pantoate--beta-alanine ligase
C_RS04605	1.6099	-0.428281	0.253813	0	-1.07584	2.12354	1	0.1	1036	GpE family phage tail protein
C_RS28655	46.8891	-1.09848	0.288032	2	-0.123268	0.296279	0	0.2	1037	alpha/beta fold hydrolase
C_RS04840	3.44752	-0.504598	0.394815	0	-0.647241	1.62604	1	0.1	1038	cysteine/glutathione ABC transporter ATP-bindingprotein/permease CydC
C_RS22925	8.70297	-0.530598	0.344186	0	-0.569052	1.16529	1	0.1	1039	L-rhamnose mutarotase
C_RS10585	10.6653	-0.701727	0.3707	0	-0.651085	1.21277	0	0	1040	DNA-binding transcriptional regulator KdgR
C_RS15745	0.388119	-0.0137918	0.00970001	0	-1.85959	1.5691	3	0.3	1041	cell division protein FtsB
C_RS16155	19.3307	-0.654756	0.450549	1	-0.39785	0.799768	0	0.1	1042	type VI secretion system ImpA family N-terminal domain-containing protein
C_RS05145	5.73069	-0.550153	0.281451	0	-1.11192	0.601682	0	0	1043	macrodomain Ter protein MatP
C_RS24745	7.29901	-0.529869	0.330629	0	-0.568251	0.938059	1	0.1	1044	fumarate reductase subunit FrdD
C_RS22015	14.2812	-0.766267	0.248585	0	-0.581062	0.309379	0	0	1045	transcriptional regulator AsnC
C_RS05580	9.68317	-0.678842	0.468552	1	-0.377172	0.919962	0	0.1	1046	beta-ketoacyl-[acyl-carrier-protein] synthase family protein
C_RS19615	3.31881	-0.418088	0.31786	0	-1.17425	1.46715	1	0.1	1047	nitrite reductase small subunit NirD
C_RS17055	2.34059	-0.560437	0.451202	1	0.498607	0.627118	0	0.1	1048	Major pilus subunit operon regulatory protein
C_RS12575	26.3525	-0.766934	0.267845	0	-0.575719	0.548299	0	0	1049	SWIM zinc finger family protein
C_RS24480	12.3485	-0.573028	0.467228	1	-0.477753	0.831478	0	0.1	1050	P fimbria tip G-adhesin PapG-II
C_RS07850	12.2297	-0.761159	0.216251	0	-0.581552	0.545403	0	0	1051	two-component system response regulator NarL
C_RS25305	27.5881	-0.902615	0.277794	0	-0.493097	0.324096	0	0	1052	leucyl aminopeptidase
C_RS21190	40.1782	-0.987538	0.393629	1	-0.271245	0.651111	0	0.1	1053.5	alpha-xylosidase
C_RS24885	4.11287	-0.398293	0.198197	0	-1.62317	1.61327	1	0.1	1053.5	DUF2170 family protein
C_RS10285	9.06931	-0.678531	0.33661	0	-0.664636	0.532714	0	0	1055	DeoR/GlpR transcriptional regulator
C_RS24015	14.7663	-0.627854	0.283381	0	-0.748932	0.621278	0	0	1056	ABC transporter ATP-binding protein
C_RS07180	4.79802	-0.464958	0.238365	0	-0.750271	1.53947	1	0.1	1057	host-nuclease inhibitor protein Gam
C_RS21890	19.905	-0.953445	0.697889	1	-0.274257	0.396813	0	0.1	1058	glucosamine-6-phosphate deaminase
C_RS19100	5.68515	-0.4395	0.290813	0	-0.921824	1.08666	1	0.1	1059	multidrug efflux transporter transcriptional repressor AcrS
C_RS01930	10.0515	-0.609587	0.334128	0	-0.799761	0.646356	0	0	1060	reactive chlorine species resistance protein RclC
C_RS12460	10.301	-0.678721	0.228065	0	-0.656584	0.791134	0	0	1061	sugar kinase
C_RS12205	15.2376	-0.735214	0.30234	0	-0.595915	0.466041	0	0	1062	undecaprenyl-phosphate glucose phosphotransferase
C_RS16075	15.2911	-0.779997	0.338078	0	-0.554631	0.494546	0	0	1063	type VI secretion system baseplate subunit TssK
C_RS07625	3.93861	-0.344292	0.132461	0	-1.03343	1.43757	2	0.2	1064	hemolysin E
C_RS24575	24.2574	-0.855908	0.547681	1	-0.288044	0.412876	0	0.1	1065	phosphoglycerate transport regulator PgtC
C_RS13110	8.27921	-0.61126	0.282215	0	-0.770337	0.63844	0	0	1066	acetate CoA-transferase subunit alpha
C_RS24130	7.19802	-0.407102	0.0863605	0	-1.2652	0.806519	1	0.1	1067	phosphonate C-P lyase system protein PhnL
C_RS10765	16.0277	-0.653235	0.158865	0	-0.682349	0.682969	0	0	1068	zinc ABC transporter permease subunit ZnuB
C_RS22730	0.566337	-0.0719532	0.0909472	0	-1.44701	2.246	3	0.3	1069	DNA polymerase I
C_RS19530	33.2178	-0.735646	0.560426	1	-0.337122	0.261162	0	0.1	1070	glutathione-regulated potassium-efflux system protein KefB
C_RS13765	14.2832	-0.807895	0.292823	0	-0.529476	0.858851	0	0	1071	multidrug efflux MFS transporter permease subunit EmrY
C_RS21035	0.918812	-0.0137918	0.00970001	0	-1.64363	2.49191	3	0.3	1072	lipid IV(A) 3-deoxy-D-manno-octulosonic acid transferase
C_RS17510	3.11485	-0.34858	0.0680483	0	-0.958899	1.8268	2	0.2	1073	XcbB/CpsF family capsular polysaccharide biosynthesis protein
C_RS15160	8.6099	-0.657879	0.461891	0	-0.672999	0.930358	0	0	1074	DUF968 domain-containing protein
C_RS09820	24.2079	-0.85778	0.347592	1	-0.285759	0.318863	0	0.1	1075	Fe-S cluster assembly protein SufB
C_RS05450	6.29505	-0.502992	0.321896	0	-0.61764	1.64048	1	0.1	1076	poly-beta-1,6-N-acetyl-D-glucosamine biosynthesis protein PgaD
C_RS19525	2.18812	-0.507347	0.278081	0	-0.605279	2.73966	1	0.1	1077	YheV family putative metal-binding protein
C_RS18625	0.360396	-0.0326613	0.0402419	0	-1.48202	1.28523	3	0.3	1078	ribosome maturation factor RimP
C_RS06440	50.2376	-0.696242	0.439978	1	-0.35435	0.447257	0	0.1	1079	ferric-rhodotorulic acid/ferric-coprogen receptor FhuE
C_RS24965	8.67327	-0.640487	0.179996	0	-0.696536	0.710114	0	0	1080	L-ribulose-5-phosphate 3-epimerase UlaE
C_RS12245	4.14851	-0.412422	0.121003	0	-1.16608	1.75514	1	0.1	1081	colanic acid biosynthesis glycosyltransferase WcaE
C_RS24410	8.73069	-0.525634	0.294572	0	-1.23209	0.589095	0	0	1082	50S ribosome-binding GTPase
C_RS09585	0.291089	-0.0137918	0.00970001	0	-1.60042	1.27063	3	0.3	1083	tyrosine--tRNA ligase
C_RS05175	8.92871	-0.626784	0.244174	0	-0.717092	0.912146	0	0	1084	YccF domain-containing protein
C_RS05915	14.099	-0.613677	0.341007	0	-0.748059	0.444903	0	0	1085	IS4 family transposase
C_RS13640	7.4099	-0.494961	0.39527	0	-0.629321	1.27835	1	0.1	1086	endonuclease SmrB
C_RS08850	16.4475	-0.542719	0.51604	1	-0.503597	0.576646	0	0.1	1087	hypothetical protein
C_RS23370	3.77426	-0.678935	0.423413	0	-0.63243	1.04172	0	0	1088	elongation factor Tu
C_RS03765	0.376238	-0.224512	0.0147715	0	-1.10271	2.09106	3	0.3	1089	succinate dehydrogenase membrane anchor subunit
C_RS08365	12.9822	-0.700282	0.307165	0	-0.611764	0.474183	0	0	1090	sugar phosphate isomerase/epimerase
C_RS03560	6.71287	-0.72089	0.313026	0	-0.588649	1.01532	0	0	1091	TerC family protein
C_RS18405	17.4139	-0.667383	0.308974	0	-0.646328	0.353302	0	0	1092	glycerate 2-kinase
C_RS06720	2.62772	-0.396662	0.366694	0	-1.45642	2.40635	1	0.1	1093	class II holin family protein
C_RS10170	15.8455	-1.05863	0.234055	0	-0.435024	0.695472	0	0	1094	protein YdjY
C_RS13730	160.212	-1.1896	0.556098	2	0.0965767	0.253266	0	0.2	1095	autotransporter outer membrane beta-barrel domain-containing protein
C_RS05750	0.960396	-0.317478	0.179796	0	-1.56735	2.07771	2	0.2	1096	microcin H47 immunity protein MchI
C_RS08455	16.505	-0.570689	0.329941	0	-0.884463	0.714654	0	0	1097	low conductance mechanosensitive channel YnaI
C_RS18315	6.17822	-0.579277	0.316992	0	-0.85488	0.577037	0	0	1098	phage holin family protein
C_RS23020	0.861386	-0.0137918	0.00970001	0	-1.49175	1.79901	3	0.3	1099	triose-phosphate isomerase
C_RS04410	7.38218	-0.706765	0.347271	0	-0.590918	1.15091	0	0	1100	hypothetical protein
C_RS16895	26.4851	-0.614024	0.503469	1	-0.402452	0.447608	0	0.1	1101	phosphoethanolamine transferase
C_RS04285	18.4772	-0.847518	0.143506	0	-0.485779	0.145404	0	0	1102	sugar-phosphatase YbiV
C_RS18590	20.5584	-0.800677	0.225496	0	-0.506823	0.416369	0	0	1103	lipoprotein NlpI
C_RS13575	5.97624	-0.633341	0.45902	1	0.381636	0.509549	0	0.1	1104	tRNA pseudouridine(38-40) synthase TruA
C_RS13150	30.5366	-0.900154	0.163897	0	-0.460293	0.404825	0	0	1105.5	DUF2138 domain-containing protein
C_RS15750	8.12079	-0.629462	0.369201	0	0.685334	0.797685	0	0	1105.5	DUF3561 family protein
C_RS18610	0.394059	-0.215408	0.054305	0	-1.08052	1.74886	3	0.3	1107	30S ribosome-binding factor RbfA
C_RS00920	23.2257	-0.714677	0.573265	1	0.329603	0.586994	0	0.1	1108	DNA-binding transcriptional regulator CdaR
C_RS02515	27.2	-1.00303	0.177406	0	-0.431148	0.568891	0	0	1109.5	muropeptide MFS transporter AmpG
C_RS27140	7.26535	-0.675757	0.303882	0	-0.617541	0.545396	0	0	1109.5	gamma-glutamyltranspeptidase
C_RS09825	5.41386	-0.562542	0.320855	0	-0.878499	0.33596	0	0	1111	Fe-S cluster assembly scaffold SufA
C_RS24645	27.2178	-0.608749	0.207009	0	-0.714819	0.179534	0	0	1112	integrase arm-type DNA-binding domain-containingprotein
C_RS16990	4.38218	-0.452293	0.41321	0	-0.730957	2.08742	1	0.1	1113.5	transposase domain-containing protein
C_RS04730	3.03762	-0.38962	0.147834	0	-1.51516	1.38332	1	0.1	1113.5	heavy metal-binding domain-containing protein
C_RS11045	8.26931	-0.65454	0.424438	0	-0.634464	0.700549	0	0	1115	L-cystine ABC transporter ATP-binding protein YecC
C_RS07820	1.06337	-0.301387	0.170443	0	-1.89354	2.18692	2	0.2	1116	type I toxin-antitoxin system toxin Ldr family protein
C_RS11690	4.18218	-0.513347	0.236598	0	-0.550464	1.56051	1	0.1	1117	colibactin biosynthesis aminomalonyl-acyl carrier protein ClbE
C_RS29395	4.87525	-0.590094	0.246418	0	-0.765438	0.885827	0	0	1118	hypothetical protein
C_RS28940	19.4059	-0.702044	0.282048	0	-0.579312	0.481623	0	0	1119	IS3 family transposase
C_RS03610	0.372277	-0.037811	0.05474	0	1.24455	2.6066	3	0.3	1120	ferric iron uptake transcriptional regulator
C_RS04445	2.68911	-0.374582	0.16873	0	-1.99487	1.79102	1	0.1	1121	DUF2732 family protein
C_RS26455	1.94455	-0.312515	0.295548	0	-1.52921	2.8458	2	0.2	1122	cold-shock protein
C_RS29055	5.4	-0.550616	0.308024	0	-0.913624	0.896771	0	0	1123	DUF2754 domain-containing protein
C_RS07990	23.6139	-0.650644	0.499782	1	-0.358178	0.716208	0	0.1	1124	oligopeptide ABC transporter permease OppB
C_RS18950	15.3149	-0.688884	0.524324	1	-0.336448	0.591202	0	0.1	1125.5	HTH-type transcriptional activator AaeR
C_RS24595	7.25149	-0.442672	0.315722	0	-0.769824	1.09422	1	0.1	1125.5	hypothetical protein
C_RS29200	0.683168	-0.336875	0.121875	0	-0.993333	2.23612	2	0.2	1127	DUF1627 domain-containing protein
C_RS09180	5.97228	-0.467521	0.24311	0	-0.662571	1.47018	1	0.1	1128	multiple antibiotic resistance transcriptional regulator MarR
C_RS07490	1.85941	-0.465286	0.136025	0	-0.667868	2.42447	1	0.1	1129	hypothetical protein
C_RS12075	0.776238	-0.0137918	0.00970001	0	-1.33002	2.37438	3	0.3	1130	YoeB-YefM toxin-antitoxin system antitoxin YefM
C_RS06260	13.4257	-0.682393	0.248606	0	-0.592868	0.410159	0	0	1131	ribosomal protein S5-alanine N-acetyltransferase
C_RS01715	15.8158	-0.70066	0.483757	0	-0.574249	0.93187	0	0	1132	class II glutamine amidotransferase
C_RS13975	17.0396	-0.916141	0.362889	0	-0.441301	0.707789	0	0	1133	membrane protein
C_RS04610	27.6614	-0.80898	0.527616	2	-0.135957	0.258338	0	0.2	1134	phage tail tape measure protein
C_RS10895	20.4574	-0.676925	0.272189	0	-0.599549	0.503838	0	0	1135	methyl-accepting chemotaxis protein II
C_RS09390	3.75248	-0.459737	0.273115	0	-0.687237	2.09588	1	0.1	1136	multidrug/spermidine efflux SMR transporter subunit MdtJ
C_RS15945	13.699	-0.668703	0.366298	0	-0.606913	0.716837	0	0	1137	SecY-interacting protein
C_RS28155	3.24752	-0.438313	0.276239	0	-0.792908	1.06908	1	0.1	1138	ATP-binding domain-containing protein
C_RS20050	2.72475	-0.455783	0.16622	0	0.702173	0.927345	1	0.1	1139	DUF2756 family protein
C_RS09785	7.1703	-0.599754	0.390327	0	-0.717684	0.712363	0	0	1140	pyruvate kinase PykF
C_RS27185	0.281188	-0.0137918	0.00970001	0	-1.29695	1.56527	3	0.3	1141	his operon leader peptide
C_RS26855	1.79604	-0.315106	0.286055	0	-1.38867	2.4718	2	0.2	1142	Hok/Gef family protein
C_RS17710	21.1782	-0.820941	0.29009	0	-0.474117	0.39586	0	0	1143	hydrogenase 2 operon protein HybA
C_RS12495	8.52079	-0.586762	0.24783	0	-0.750646	0.34435	0	0	1144	Ni(II)/Co(II) efflux transporter accessory subunit RcnB
C_RS02050	10.8713	-0.570982	0.260212	0	-0.803927	0.633975	0	0	1145	acyl-CoA synthetase FdrA
C_RS15255	18.9802	-0.691052	0.44692	1	-0.329746	0.798199	0	0.1	1146	L-2-hydroxyglutarate oxidase
C_RS21625	23.9644	-0.695662	0.396349	0	-0.57112	0.369933	0	0	1147	adenine permease AdeQ
C_RS25645	41.8693	-1.29607	0.529847	2	-0.0797381	0.343465	0	0.2	1148	pyruvate/proton symporter BtsT
C_RS06765	0.306931	-0.201062	0.0476298	0	-1.02723	2.14762	3	0.3	1149	YlcI/YnfO family protein
C_RS04920	31.1208	-0.762037	0.429238	1	-0.290004	0.476287	0	0.1	1150	30S ribosomal protein S12 methylthiotransferase accessory protein YcaO
C_RS03735	11.3347	-0.565002	0.284919	0	-0.814378	0.635492	0	0	1151	endonuclease VIII
C_RS15820	8.73465	-0.524918	0.256685	0	-1.02714	0.951592	0	0	1152	electron transfer flavoprotein subunit beta/FixAfamily protein
C_RS28650	38.9465	-0.695313	0.46346	1	-0.32435	0.409147	0	0.1	1153	yersiniabactin polyketide synthase HMWP1
C_RS14225	30.998	-0.894728	0.7403	1	-0.250024	0.840037	0	0.1	1154.5	nitrate/nitrite two-component system sensor histidine kinase NarQ
C_RS05885	18.4515	-0.873318	0.565432	1	-0.25563	0.547694	0	0.1	1154.5	salmochelin biosynthesis C-glycosyltransferase IroB
C_RS10720	21.4356	-0.783637	0.553381	1	-0.281312	0.415901	0	0.1	1156	phosphogluconate dehydratase
C_RS02780	32.6277	-0.790787	0.378093	1	-0.278257	0.462754	0	0.1	1157	copper-exporting P-type ATPase CopA
C_RS24520	3.2198	-0.396176	0.182343	0	-1.19419	1.68082	1	0.1	1158	type 1 fimbrial protein
C_RS15835	7.4297	-0.523271	0.233719	0	-1.02662	0.833699	0	0	1159	SDR family oxidoreductase
C_RS29265	12.402	-0.60469	0.275532	0	-0.686195	0.895032	0	0	1160	ShET2/EspL2 family type III secretion system effector toxin
C_RS05500	0.946535	-0.296784	0.0925791	0	-1.75873	1.96657	2	0.2	1161	DUF3987 domain-containing protein
C_RS01570	14.7881	-0.716932	0.189041	0	-0.537977	0.450851	0	0	1162	hypothetical protein
C_RS21440	5.4297	-0.411833	0.215816	0	-0.950437	0.923572	1	0.1	1163	maturase
C_RS12485	2.33663	-0.39587	0.10413	0	-1.1824	1.38264	1	0.1	1164	Ni(II)/Co(II)-binding transcriptional repressor RcnR
C_RS13680	8.73069	-0.639778	0.373575	0	-0.619731	1.35313	0	0	1165	fimbrial protein
C_RS06575	0.433663	-0.361817	0.156953	0	0.701577	2.30817	2	0.2	1166	DUF1482 family protein
C_RS04370	16.0891	-0.900142	0.290686	0	-0.427635	0.481961	0	0	1167	serine-type D-Ala-D-Ala carboxypeptidase
C_RS00340	14.5743	-0.798989	0.192662	0	-0.470187	0.378263	0	0	1168	L-ribulose-5-phosphate 4-epimerase
C_RS05020	42.6891	-0.866743	0.42603	1	0.250251	0.40884	0	0.1	1169	L,D-transpeptidase
C_RS01745	12.8574	-0.581867	0.203308	0	-0.725003	0.540256	0	0	1170	GNAT family N-acetyltransferase
C_RS20175	13.5347	-0.660382	0.276906	0	-0.588638	0.465235	0	0	1171	7-cyano-7-deazaguanine/7-aminomethyl-7- deazaguanine transporter
C_RS14115	7.01386	-0.535596	0.406867	0	-0.464425	1.10978	1	0.1	1172	ethanolamine utilization microcompartment protein EutK
C_RS26215	1.8099	-0.325864	0.0629695	0	-1.06129	1.56664	2	0.2	1173	PbsX family transcriptional regulator
C_RS02245	4.8099	-0.441991	0.118073	0	-0.717952	1.01085	1	0.1	1174	DUF2755 family protein
C_RS02650	13.8574	-0.660773	0.399135	0	-0.584411	0.244387	0	0	1175.5	maltose O-acetyltransferase
C_RS04275	13.3584	-0.581666	0.343553	0	-0.719905	0.838634	0	0	1175.5	L,D-transpeptidase
C_RS17880	19.7703	-0.667532	0.167594	0	-0.574694	0.511237	0	0	1177.5	two-component system sensor histidine kinase QseC
C_RS15520	8.49901	-0.568171	0.343839	0	-0.758916	1.09436	0	0	1177.5	arabinose-5-phosphate isomerase GutQ
C_RS21510	3.36436	-0.44403	0.0737038	0	-0.706189	1.52387	1	0.1	1179	hypothetical protein
C_RS24045	17.8257	-0.552779	0.274283	0	-0.821465	0.482475	0	0	1180	multidrug efflux transporter outer membrane subunit MdtP
C_RS18485	5.76634	-0.453459	0.379379	0	-0.664681	2.46286	1	0.1	1181	PTS N-acetylgalactosamine transporter subunit IIB
C_RS07740	16.3089	-0.645245	0.424538	0	-0.595862	0.918567	0	0	1182	dihydroxyacetone kinase subunit DhaK
C_RS03705	27.8218	-0.762342	0.441761	1	-0.278955	0.385319	0	0.1	1183	deoxyribodipyrimidine photo-lyase
C_RS04525	3.23564	-0.337308	0.274892	0	-0.888431	1.26	2	0.2	1184	hypothetical protein
C_RS22875	10.4416	-0.766997	0.299963	0	-0.480054	0.801882	0	0	1185	hypothetical protein
C_RS21040	0.530693	-0.188945	0.0898854	0	-0.959806	2.56675	3	0.3	1186	pantetheine-phosphate adenylyltransferase
C_RS24775	39.3663	-0.832784	0.382187	1	-0.255132	0.251117	0	0.1	1187	miniconductance mechanosensitive channel MscM
C_RS08040	11.6099	-0.609641	0.256885	0	-0.649686	0.424714	0	0	1188	acyl-CoA thioester hydrolase YciA
C_RS17385	5.23762	-0.394317	0.359811	0	-1.12413	2.11168	1	0.1	1189	IS66 family insertion sequence element accessoryprotein TnpB
C_RS14260	28.7149	-0.710834	0.460922	1	-0.299652	0.226701	0	0.1	1190	tRNA cytosine(34) acetyltransferase TmcA
C_RS11495	16.8396	-0.589045	0.181584	0	-0.692279	0.506713	0	0	1191	yersiniabactin ABC transporter ATP-binding/permease protein YbtP
C_RS01310	5.10099	-0.530398	0.194383	0	-0.903392	0.417942	0	0	1192	DUF905 family protein
C_RS24415	20.0139	-0.606863	0.112403	0	-0.649575	0.440038	0	0	1193	hypothetical protein
C_RS23580	5.2198	-0.493339	0.27877	0	-0.54628	0.975609	1	0.1	1194	hypothetical protein
C_RS11310	4.39208	-0.507681	0.143218	0	-1.07085	1.27094	0	0	1195	hydroxyisourate hydrolase
C_RS01935	0.831683	-0.292072	0.106646	0	-1.68641	1.97152	2	0.2	1196	DUF1471 domain-containing protein
C_RS19970	44.0158	-0.776683	0.54742	1	-0.270373	0.197919	0	0.1	1197	1,4-alpha-glucan branching enzyme
C_RS24895	11.2535	-0.594621	0.296522	0	-0.669789	0.515399	0	0	1198	YjfK family protein
C_RS01105	19.0139	-1.05122	0.352984	1	-0.214349	0.472405	0	0.1	1199	methionine ABC transporter permease MetI
C_RS10495	9.33861	-0.646193	0.408753	0	-0.580317	0.72335	0	0	1200	CoA pyrophosphatase
C_RS05000	18.4158	-0.780423	0.455938	1	-0.266929	0.315077	0	0.1	1201	tRNA uridine 5-oxyacetic acid(34) methyltransferase CmoM
C_RS22465	10	-0.436124	0.172259	0	-0.716526	1.1749	1	0.1	1202	hypothetical protein
C_RS23425	0.706931	-0.250117	0.126441	0	0.419877	3.65032	4	0.4	1203	sulfur carrier protein ThiS
C_RS19200	28.3465	-0.737726	0.479837	1	-0.281468	0.552049	0	0.1	1204	DNA-protecting protein DprA
C_RS11925	16.802	-0.772879	0.61382	1	-0.12621	1.56164	1	0.2	1205	hypothetical protein
C_RS12190	11.6297	-0.591752	0.651666	1	-0.377668	0.617847	0	0.1	1206	colanic acid biosynthesis glycosyltransferase WcaL
C_RS09670	3.40594	-0.381908	0.1471	0	-1.3053	1.23721	1	0.1	1207	monothiol glutaredoxin 4
C_RS28760	7.29901	-0.560401	0.299613	0	-0.739058	0.998925	0	0	1208	YdfR family protein
C_RS25670	14.5386	-0.852064	0.283556	0	-0.424055	0.548764	0	0	1209	TRAP transporter substrate-binding protein DctP
C_RS26765	1.72277	-0.34984	0.113504	0	-0.722865	1.99911	2	0.2	1210	isocitrate dehydrogenase
C_RS05300	1.44356	-0.303733	0.160952	0	-1.31837	2.62615	2	0.2	1211	addiction module toxin, GnsA/GnsB family
C_RS15515	9.66139	-0.4951	0.0809243	0	-1.14123	0.638479	0	0	1212	glucitol operon DNA-binding transcriptional repressor SrlR
C_RS20535	43.2554	-0.729156	0.502441	1	-0.280835	0.514472	0	0.1	1213	UDP-forming cellulose synthase catalytic subunit
C_RS00035	7.3604	-0.518995	0.156754	0	-0.939282	0.403667	0	0	1214	DUF2502 domain-containing protein
C_RS06155	24.8	-0.927279	0.491417	1	-0.224932	0.890462	0	0.1	1215	glucans biosynthesis protein MdoC
C_RS21165	12.8356	-0.6429	0.330046	0	-0.572872	0.446958	0	0	1216	class II fructose-bisphosphate aldolase family protein
C_RS15570	10	-0.593006	0.214345	0	-0.658673	0.68945	0	0	1217	hydrogenase maturation peptidase HycI
C_RS07615	10.9644	-0.629731	0.432086	0	-0.591395	0.828463	0	0	1218	fumarylacetoacetate hydrolase family protein
C_RS12525	11.1743	-0.661206	0.396246	0	-0.548287	0.678285	0	0	1219	YehE family protein
C_RS11340	6.51683	-0.392708	0.0945523	0	-1.06213	0.885786	1	0.1	1220	hypothetical protein
C_RS17095	4.93663	-0.462226	0.21807	0	-1.53415	0.344054	0	0	1221	TetR/AcrR family transcriptional regulator
C_RS12340	38.8931	-1.00739	0.300898	1	-0.210624	0.349036	0	0.1	1222	multidrug efflux RND transporter permease subunit MdtB
C_RS28510	1.38416	-0.412888	0.193698	0	-0.838628	1.75679	1	0.1	1223	hypothetical protein
C_RS21130	14.6396	-0.511073	0.179849	0	-0.964218	0.71575	0	0	1224	ATP-dependent DNA helicase RecG
C_RS05170	46.2693	-0.898113	0.560614	2	0.087245	0.320607	0	0.2	1225	TIGR01666 family membrane protein
C_RS16485	12.0178	-0.510272	0.24369	0	-0.964967	0.94539	0	0	1226	lysine--tRNA ligase
C_RS12850	10.1426	-0.5309	0.28268	0	-0.842172	0.910239	0	0	1227	zinc-binding GTPase YeiR
C_RS11375	2.13069	-0.456998	0.333197	0	-0.348252	2.17192	2	0.2	1228	hypothetical protein
C_RS18410	17.7782	-0.676699	0.43087	0	-0.526454	0.372198	0	0	1229.5	2-hydroxy-3-oxopropionate reductase
C_RS23645	20.5069	-0.562674	0.372628	0	-0.704524	0.546967	0	0	1229.5	lysine-sensitive aspartokinase 3
C_RS11415	1.58416	-0.354325	0.193741	0	-0.670584	2.77651	2	0.2	1231	hypothetical protein
C_RS01775	5.17822	-0.415521	0.246922	0	-0.801341	1.39553	1	0.1	1232	sigma factor-binding protein Crl
C_RS00220	25.5644	-0.702199	0.504624	1	-0.284283	0.556305	0	0.1	1233	L-carnitine CoA-transferase
C_RS07205	12.6337	-0.546068	0.271539	0	-0.754685	0.779809	0	0	1234	super-infection exclusion protein B
C_RS17275	3.62772	-0.569165	0.250442	0	0.682532	1.31546	0	0	1235	N-acetylmannosamine kinase
C_RS04660	8.5604	-0.542948	0.283573	0	-0.761232	0.856784	0	0	1236	YbjN domain-containing protein
C_RS04870	21.6059	-0.721383	0.504307	1	-0.27743	0.646876	0	0.1	1237	replication-associated recombination protein RarA
C_RS05615	35.9248	-0.802462	0.743469	1	-0.244469	0.488214	0	0.1	1238	acyl-CoA synthetase
C_RS11815	14.2614	-0.794817	0.550822	1	-0.246087	0.784582	0	0.1	1239	DMT family transporter
C_RS23890	5.62574	-0.381727	0.169709	0	-1.17933	0.73294	1	0.1	1240	MmcQ/YjbR family DNA-binding protein
C_RS29815	1.34059	-0.299086	0.0943736	0	-1.27845	1.3887	2	0.2	1241	LysR family transcriptional regulator
C_RS02800	14.305	-0.562871	0.247553	0	-0.69107	0.428997	0	0	1242	hypothetical protein
C_RS16385	24.9109	-0.625896	0.203357	0	-0.574003	0.308989	0	0	1243	YgeY family selenium metabolism-linked hydrolase
C_RS07755	2.49307	-0.404207	0.130033	0	-0.878536	1.47245	1	0.1	1244	redox-regulated ATPase YchF
C_RS10050	13.9129	-0.736453	0.409538	1	-0.267864	1.11358	0	0.1	1245	hexitol phosphatase HxpB
C_RS25905	12.699	-0.580149	0.39654	0	-0.652004	0.379143	0	0	1246	2,3-diphosphoglycerate-dependent phosphoglycerate mutase GpmB
C_RS22510	13.0832	-0.488181	0.246344	0	-0.519509	1.11474	1	0.1	1247	carbamate kinase
C_RS23700	23.002	-0.751223	0.373128	0	-0.451094	0.416871	0	0	1248	maltose/maltodextrin ABC transporter substrate-binding protein MalE
C_RS17560	14.9188	-0.474122	0.472744	1	-0.547558	0.674219	0	0.1	1249	IS4 family transposase
C_RS01960	13.1861	-0.534447	0.247403	0	-0.767541	0.403649	0	0	1250.5	lactate utilization protein C
C_RS01920	7.11485	-0.525723	0.272828	0	0.827759	0.75814	0	0	1250.5	helix-turn-helix domain-containing protein
C_RS13530	12.099	-0.683842	0.384871	0	-0.496469	0.744373	0	0	1252.5	histidine ABC transporter substrate-binding protein HisJ
C_RS21205	27.0673	-0.579973	0.262479	0	-0.64839	0.582063	0	0	1252.5	tyrosine-type recombinase/integrase
C_RS04115	28.297	-0.796336	0.437738	1	-0.24131	0.455363	0	0.1	1254	UPF0104 family protein
C_RS08730	27.0733	-0.638485	0.430063	1	-0.313325	0.357977	0	0.1	1255	23S rRNA 5-hydroxycytidine C2501 synthase
C_RS01170	25.9703	-0.858083	0.214958	0	-0.396591	0.202643	0	0	1256	murein transglycosylase D
C_RS25390	3.58614	-0.423614	0.238719	0	-0.707155	1.41071	1	0.1	1257	DUF1819 family protein
C_RS14125	10.4139	-0.59137	0.260005	0	-0.623105	0.576948	0	0	1258	ethanolamine ammonia-lyase subunit beta
C_RS18415	10.3644	-0.610493	0.372499	0	-0.585456	0.881224	0	0	1259	2-dehydro-3-deoxyglucarate aldolase
C_RS04320	26.9683	-0.73884	0.405462	0	-0.454056	0.407488	0	0	1260	glutathione ABC transporter ATP-binding protein GsiA
C_RS08620	25.4495	-0.736568	0.51047	1	-0.261999	0.656139	0	0.1	1261	bifunctional alpha/beta hydrolase/class I SAM-dependent methyltransferase
C_RS01330	4.25149	-0.303584	0.0674337	0	-1.12421	1.8529	2	0.2	1262	hypothetical protein
C_RS02600	33.5069	-0.910481	0.716046	2	-0.0741041	0.419336	0	0.2	1263	SmdA family multidrug ABC transporter permease/ATP-binding protein
C_RS09415	16.1762	-0.596955	0.548464	1	-0.346129	0.576443	0	0.1	1264	amino acid permease
C_RS16780	3.57624	-0.266759	0.0872988	0	-1.88379	1.10988	2	0.2	1265	YqgE/AlgH family protein
C_RS06565	4.59802	-0.360662	0.302041	0	-1.60069	2.28824	1	0.1	1266	excisionase
C_RS24310	24.905	-0.55864	0.406722	0	-0.679538	0.499513	0	0	1267	dipeptide/tripeptide permease DtpC
C_RS25910	21.7505	-1.0024	0.854664	1	-0.19533	0.997196	0	0.1	1268	MDR efflux pump AcrAB transcriptional activator RobA
C_RS12230	10.0396	-0.623429	0.354333	0	-0.557892	0.807696	0	0	1269	GDP-L-fucose synthase
C_RS04905	10.3307	-0.625021	0.221144	0	-0.551848	0.140501	0	0	1270	pyruvate formate lyase 1-activating protein
C_RS10235	3.61584	-0.387486	0.167156	0	-0.493045	2.24333	2	0.2	1271	hypothetical protein
C_RS06275	0.49505	-0.0691027	0.121009	0	-0.865073	2.13926	3	0.3	1272	murein biosynthesis integral membrane protein MurJ
C_RS23735	1.28515	-0.24392	0.0923235	0	-2.41137	1.93226	2	0.2	1273	glycerol-3-phosphate 1-O-acyltransferase PlsB
C_RS14720	9.81584	-0.57921	0.281409	0	0.62577	0.367144	0	0	1274	ATP-dependent RNA helicase SrmB
C_RS12005	5.18812	-0.499617	0.359252	0	-0.472198	1.74404	1	0.1	1275	type IV toxin-antitoxin system toxin CbtA
C_RS22210	17.3406	-0.582251	0.367333	0	-0.617886	0.508922	0	0	1276	ECA polysaccharide chain length modulation protein
C_RS18450	3.67525	-0.417855	0.162994	0	-0.708932	2.21823	1	0.1	1277	PTS N-acetylgalactosamine transporter subunit IIB
C_RS24250	29.1386	-0.62784	0.236464	0	-0.53824	0.401764	0	0	1278.5	alpha-galactosidase
C_RS04375	10.7109	-0.539373	0.212656	0	-0.711749	0.377676	0	0	1278.5	DNA-binding transcriptional repressor DeoR
C_RS14930	1.0495	-0.244752	0.107681	0	-2.26172	2.36864	2	0.2	1280	type II toxin-antitoxin system toxin RatA
C_RS13805	10.6079	-0.665359	0.203071	0	-0.49493	0.824252	0	0	1281.5	YfdX family protein
C_RS13350	31.0079	-0.645837	0.340876	0	-0.512855	0.334506	0	0	1281.5	VWA domain-containing protein
C_RS01365	17.1287	-0.895648	0.782209	1	-0.206108	0.348676	0	0.1	1283	tyrosine-type recombinase/integrase
C_RS12505	48.802	-0.865836	0.328554	0	-0.37908	0.254021	0	0	1284	fimbrial biogenesis outer membrane usher protein
C_RS15455	0.774257	-0.256198	0.0732507	0	-1.97371	2.16028	2	0.2	1285	carbon storage regulator CsrA
C_RS25530	9.39406	-0.488589	0.13668	0	-0.988404	0.4829	0	0	1286	anti-adapter protein IraD
C_RS18835	71.8614	-1.00263	0.409599	1	-0.1899	0.318482	0	0.1	1287	glutamate synthase large subunit
C_RS12275	5.61188	-0.381414	0.263434	0	-1.03535	1.62559	1	0.1	1288	low molecular weight protein-tyrosine-phosphatase Wzb
C_RS16015	5.85545	-0.463712	0.127404	0	-1.18878	0.469355	0	0	1289	DUF423 domain-containing protein
C_RS13455	12.503	-0.598462	0.306159	0	-0.580866	0.787606	0	0	1290	YfbU family protein
C_RS27110	2.27921	-0.374703	0.0749916	0	-1.12727	1.01111	1	0.1	1291	IS3 family transposase
C_RS20040	4.12673	-0.287008	0.0446424	0	-1.30184	1.21171	2	0.2	1292	YrhB family protein
C_RS10360	15.5327	-0.950406	0.193796	0	-0.355026	0.396727	0	0	1293	GGDEF domain-containing protein
C_RS18830	19.2851	-0.795857	0.565392	1	-0.228996	0.380924	0	0.1	1294	TIGR01212 family radical SAM protein
C_RS09535	3.20396	-0.373956	0.0968317	0	-1.13846	0.922897	1	0.1	1295	electron transport complex subunit RsxB
C_RS04590	12.9188	-0.637795	0.562411	1	-0.297133	0.930577	0	0.1	1296	phage tail sheath protein
C_RS14455	86.9109	-1.25674	0.68446	2	-0.0370748	0.351565	0	0.2	1297	alpha2-macroglobulin
C_RS00205	10.1545	-0.684189	0.319505	0	-0.470244	0.798679	0	0	1299	carnitine operon protein CaiE
C_RS02700	7.65545	-0.583702	0.296264	0	-0.603318	0.924087	0	0	1299	DUF454 family protein
C_RS01885	15.2812	-0.565796	0.370393	0	-0.633422	0.739745	0	0	1299	NADH-dependent flavin oxidoreductase
C_RS23165	16.2238	-0.749062	0.222531	0	-0.425838	0.887028	0	0	1301	cystine transporter YijE
C_RS16510	1.61188	-0.734107	0.508083	1	0.248598	1.27447	0	0.1	1302	flavodoxin FldB
C_RS07390	5.74653	-0.531086	0.0783025	0	-0.725337	0.581206	0	0	1303	tail attachment protein
C_RS12240	3.11287	-0.336275	0.115514	0	-0.399405	2.111	3	0.3	1304	colanic acid biosynthesis acetyltransferase WcaF
C_RS09845	24.5228	-0.783359	0.486069	1	-0.232112	0.636562	0	0.1	1305	AI-2E family transporter YdiK
C_RS23030	6.11485	-0.39859	0.246946	0	-0.836438	1.17602	1	0.1	1306	DUF805 domain-containing protein
C_RS23135	31.2257	-0.798017	0.428207	0	-0.398407	0.783533	0	0	1307	bifunctional metallophosphatase/5'-nucleotidase
C_RS01535	32.6455	-0.901282	0.665529	1	-0.199483	0.219858	0	0.1	1308	L-fucose:H+ symporter permease
C_RS15580	5.40396	-0.407381	0.214879	0	-0.739232	1.16697	1	0.1	1309.5	formate hydrogenlyase subunit HycG
C_RS09520	4.72277	-0.39989	0.327964	0	-0.814835	1.46756	1	0.1	1309.5	transcription modulator YdgT
C_RS08400	20.0634	-0.719063	0.443484	0	-0.443837	0.633691	0	0	1311	YcjX family protein
C_RS02770	13.2	-0.638256	0.331305	0	-0.504731	0.877212	0	0	1312	TraB/GumN family protein
C_RS23145	24.1861	-0.622527	0.34117	0	-0.532807	0.671219	0	0	1313	hypothetical protein
C_RS05625	3.62376	-0.390727	0.121471	0	-0.895112	1.47986	1	0.1	1314	acyl carrier protein
C_RS10535	4.88911	-0.445648	0.296608	0	-1.38453	0.725097	0	0	1315	DUF986 domain-containing protein
C_RS21215	24.796	-0.788265	0.399756	0	-0.400107	0.629505	0	0	1316	LacI family DNA-binding transcriptional regulator
C_RS14405	1.17426	-0.228132	0.119123	0	-2.34505	1.96309	2	0.2	1317	zinc ribbon domain-containing protein
C_RS29830	8.05545	-0.570394	0.36872	0	-0.614965	0.744272	0	0	1318	glutathione S-transferase family protein
C_RS20680	1.86139	-0.351674	0.0650851	0	-1.60686	0.552328	1	0.1	1319	type I toxin-antitoxin system toxin HokA
C_RS10525	16.202	-0.665712	0.275044	0	-0.474105	0.650456	0	0	1320	PTS mannose transporter subunit IIC
C_RS15840	17.8812	-0.717052	0.430348	1	-0.249927	0.145002	0	0.1	1321	MFS transporter
C_RS02595	5.35842	-0.53499	0.384516	0	0.692216	0.826775	0	0	1322	DNA-binding transcriptional regulator DecR
C_RS04405	6.16238	-0.3718	0.308131	0	-1.0938	1.90168	1	0.1	1323	DNA-binding transcriptional regulator RcdA
C_RS17110	1.08515	-0.257553	0.10732	0	-1.69626	2.36942	2	0.2	1324	hypothetical protein
C_RS22550	29.2693	-0.643063	0.356076	0	-0.490593	0.590789	0	0	1325	tripartite tricarboxylate transporter permease
C_RS14035	7.25941	-0.542222	0.335808	0	-0.667782	0.705177	0	0	1326	YfeK family protein
C_RS18985	0.643564	-0.0137918	0.00970001	0	-0.44088	3.04622	4	0.4	1327	rod shape-determining protein MreB
C_RS07760	1.67129	-0.250884	0.20746	0	-1.75853	2.13547	2	0.2	1328	aminoacyl-tRNA hydrolase
C_RS11795	19.0099	-0.547581	0.307331	0	-0.65088	0.686419	0	0	1329	YaiO family outer membrane beta-barrel protein
C_RS24830	18.2198	-0.5498	0.283557	0	-0.647367	0.289468	0	0	1330	DNA mismatch repair endonuclease MutL
C_RS05355	1.98614	-0.248933	0.0679179	0	-1.79284	1.80594	2	0.2	1331	hypothetical protein
C_RS24935	8.72277	-0.516338	0.267013	0	-0.754849	0.844298	0	0	1332	HTH-type transcriptional regulator UlaR
C_RS02840	6.41188	-0.472205	0.20625	0	-0.995559	0.773311	0	0	1333	ABC transporter ATP-binding protein
C_RS09030	66.5545	-1.3156	0.291952	2	-0.0252022	0.211259	0	0.2	1334	TonB-dependent receptor plug domain-containing protein
C_RS16890	21.0792	-0.684581	0.606342	1	-0.259404	0.338984	0	0.1	1335	hypothetical protein
C_RS29360	0.873267	-0.242737	0.157043	0	-1.8999	1.94774	2	0.2	1336	autotransporter outer membrane beta-barrel domain-containing protein
C_RS05125	7.86931	-0.48542	0.292623	0	-0.91945	0.641862	0	0	1337	membrane integrity-associated transporter subunit PqiC
C_RS28535	2.12475	-0.349185	0.29275	0	-1.5977	2.13545	1	0.1	1338	multidrug efflux MFS transporter
C_RS10595	9.93861	-0.671973	0.279445	0	-0.459903	1.07898	0	0	1339	protease HtpX
C_RS15350	14.105	-0.498389	0.196901	0	-0.847878	0.850673	0	0	1340.5	glycine betaine/L-proline ABC transporter ATP-binding protein ProV
C_RS15295	5.07327	-0.4603	0.177753	0	-1.10442	0.786349	0	0	1340.5	thiosulfate sulfurtransferase YgaP
C_RS11265	14.9228	-0.631443	0.295124	0	-0.496592	0.501462	0	0	1342	DNA-cytosine methyltransferase
C_RS11975	11.695	-0.526469	0.196341	0	-0.702634	0.80539	0	0	1343	hypothetical protein
C_RS13365	2.09109	-0.218303	0.119006	0	-2.18756	1.21556	2	0.2	1344	NADH-quinone oxidoreductase subunit NuoN
C_RS24550	17.8495	-0.661295	0.246562	0	-0.466191	0.226563	0	0	1345	hypothetical protein
C_RS16600	2.60198	-0.361787	0.251049	0	-1.21901	2.12018	1	0.1	1346	hypothetical protein
C_RS09945	21.1762	-0.641801	0.598946	1	0.27831	0.616523	0	0.1	1347	YdiU family protein
C_RS17850	0.269307	-0.244263	0.0208036	0	-1.78645	0.393852	2	0.2	1348	1-acylglycerol-3-phosphate O-acyltransferase
C_RS09060	53.1604	-1.1394	0.960029	2	0.0289352	0.328628	0	0.2	1349	acid resistance putative oxidoreductase YdeP
C_RS03150	2.70495	-0.67412	0.440012	1	-0.262279	0.918482	0	0.1	1350	iron-enterobactin ABC transporter permease
C_RS06630	0.79802	-0.272069	0.080482	0	-1.33584	1.94167	2	0.2	1351	hypothetical protein
C_RS00295	3.40198	-0.561094	0.299794	0	0.346358	1.35959	1	0.1	1352	16S rRNA (adenine(1518)-N(6)/adenine(1519)-N(6))- dimethyltransferase RsmA
C_RS12445	26.9465	-0.730279	0.42798	1	-0.23533	0.475187	0	0.1	1353	class I fructose-bisphosphate aldolase
C_RS10710	17.9921	-0.513968	0.230752	0	-0.745933	0.42999	0	0	1354	formate-dependent phosphoribosylglycinamide formyltransferase
C_RS07835	7.49901	-0.658187	0.265515	0	-0.466293	0.834001	0	0	1355	glutathione-specific gamma-glutamylcyclotransferase
C_RS21935	3.07921	-0.380839	0.141673	0	-0.92649	1.1893	1	0.1	1356	phosphate ABC transporter permease PstC
C_RS05350	26.9129	-0.748502	0.751343	1	-0.227567	1.01596	0	0.1	1357	bifunctional glucose-1-phosphatase/inositol phosphatase
C_RS23100	0.485149	-0.0137918	0.00970001	0	-0.790827	2.80278	3	0.3	1358	primosomal protein N'
C_RS20435	59.5406	-1.02069	0.566259	1	-0.169584	0.36525	0	0.1	1359	multidrug efflux RND transporter permease subunit
C_RS10965	1.37822	-0.243913	0.177953	0	-1.72189	2.70741	2	0.2	1360	DUF2766 domain-containing protein
C_RS06180	6.58614	-0.526312	0.35167	0	-0.690164	0.506496	0	0	1361	YceK/YidQ family lipoprotein
C_RS20630	22.3663	-0.720111	0.539901	1	-0.238851	0.864545	0	0.1	1363	MFS transporter
C_RS09465	22.0416	-0.640548	0.432784	1	-0.274858	0.443222	0	0.1	1363	glucuronide uptake porin UidC
C_RS29665	3.02772	-0.351066	0.424801	0	-1.42273	3.33857	1	0.1	1363	hypothetical protein
C_RS08090	23.5287	-0.650408	0.471062	1	-0.269118	0.683415	0	0.1	1365	anthranilate synthase component I
C_RS24175	4.23762	-0.376	0.192174	0	-0.951108	1.59737	1	0.1	1366	phosphonate ABC transporter ATP-binding protein
C_RS04050	13.7604	-0.559197	0.208687	0	-0.602307	0.460105	0	0	1367	8-amino-7-oxononanoate synthase
C_RS06080	12.3347	-0.527813	0.183154	0	-0.678184	0.390696	0	0	1368	glyoxylate/hydroxypyruvate reductase GhrA
C_RS00735	17.9188	-0.655732	0.411921	0	-0.459636	0.567383	0	0	1369	ABC transporter ATP-binding protein
C_RS16170	6.94851	-0.546417	0.332418	0	-0.355594	1.3389	1	0.1	1370	putative C-S lyase
C_RS11335	22.1921	-0.833565	0.148394	0	-0.357294	0.19943	0	0	1371	site-specific integrase
C_RS05855	6.85545	-0.352569	0.129993	0	-1.34374	1.195	1	0.1	1372	MarR family transcriptional regulator
C_RS00365	4.72079	-0.416593	0.168723	0	0.363366	1.63302	2	0.2	1373	hypothetical protein
C_RS25495	19.7149	-0.654721	0.682739	1	-0.264887	0.2512	0	0.1	1374	gluconate permease GntP
C_RS14745	11.2752	-0.516789	0.324373	0	0.398676	1.04792	1	0.1	1375	tRNA/rRNA methyltransferase
C_RS02090	2.43366	-0.436763	0.178784	0	-0.569787	1.46334	1	0.1	1376	DUF1471 domain-containing protein
C_RS20715	30.1485	-0.805074	0.381884	1	-0.201827	0.368456	0	0.1	1377	xylulokinase
C_RS02385	0.762376	-0.389427	0.347492	0	-0.434782	2.32261	2	0.2	1378	preprotein translocase subunit YajC
C_RS28410	6.48119	-0.502242	0.212879	0	-0.417619	1.74936	1	0.1	1379	hypothetical protein
C_RS05770	35.7149	-0.688295	0.43574	1	-0.244476	0.424701	0	0.1	1380	microcin export transporter peptidase/ATP-binding subunit MchF
C_RS14350	41.4178	-0.669358	0.427009	1	-0.254223	0.359688	0	0.1	1381	cyclic-guanylate-specific phosphodiesterase PdeF
C_RS14520	1.05149	-0.182288	0.0877647	0	-2.20111	1.75161	2	0.2	1382	inositol-1-monophosphatase
C_RS13270	21.9703	-0.536333	0.325598	0	-0.639282	0.57521	0	0	1383	undecaprenyl-phosphate 4-deoxy-4-formamido-L-arabinose transferase
C_RS10925	7.21386	-0.570374	0.382463	0	-0.567187	1.10838	0	0	1384	flagellar transcriptional regulator FlhD
C_RS11125	30.7168	-0.903614	0.265774	1	-0.176178	0.213689	0	0.1	1385	porin OmpD
C_RS06195	23.3584	-0.597676	0.451568	1	-0.299102	0.59259	0	0.1	1386	multidrug efflux MFS transporter MdtG
C_RS10635	2.89703	-0.482776	0.216429	0	0.866844	0.774532	0	0	1387	YebW family protein
C_RS03750	5.90495	-0.677138	0.370614	0	-0.437893	0.602974	0	0	1388	citrate (Si)-synthase
C_RS25085	40.4218	-0.578105	0.493141	1	-0.316752	0.154341	0	0.1	1389	2',3'-cyclic-nucleotide 2'-phosphodiesterase
C_RS11440	0.651485	-0.239322	0.08519	0	-1.64705	1.14823	2	0.2	1390	hypothetical protein
C_RS23255	21.6772	-0.657593	0.555457	1	-0.258004	0.37244	0	0.1	1391	D-galactonate dehydratase family protein
C_RS26220	2.52079	-0.35521	0.112409	0	-1.20262	2.40964	1	0.1	1392	transposase
C_RS13515	11.4337	-0.699711	0.322714	0	-0.237822	1.14531	1	0.1	1393	histidine ABC transporter ATP-binding protein HisP
C_RS14555	13.1287	-0.604596	0.36154	0	-0.502899	0.799049	0	0	1394	ABC transporter permease
C_RS08700	22.404	-0.915375	0.6028	2	-0.0403889	0.398726	0	0.2	1395	LbetaH domain-containing protein
C_RS01905	17.4257	-0.593216	0.395991	0	0.524144	0.567425	0	0	1396	aldo/keto reductase
C_RS25230	8.38614	-0.455234	0.18755	0	-1.03447	0.572421	0	0	1397	aspartate carbamoyltransferase regulatory subunit
C_RS07380	19.6218	-0.751736	0.423933	1	-0.21511	0.636774	0	0.1	1398	minor capsid protein E
C_RS16730	31.1584	-0.668167	0.460578	0	-0.439332	0.372713	0	0	1399	biosynthetic arginine decarboxylase
C_RS19515	1.25941	-0.259049	0.0587444	0	-1.34865	2.04397	2	0.2	1400	protein SlyX
C_RS03385	3.14653	-0.351198	0.159006	0	-1.27108	1.08682	1	0.1	1401	ribosome silencing factor
C_RS17475	13.0574	-0.727948	0.109937	0	-0.396233	0.523257	0	0	1402.5	KpsF/GutQ family sugar-phosphate isomerase
C_RS04470	5.10099	-0.519216	0.125962	0	-0.679988	1.07374	0	0	1402.5	DinI family protein
C_RS01785	15.7069	-0.612713	0.340313	0	-0.487373	0.455694	0	0	1404.5	glutamate 5-kinase
C_RS16090	11.5901	-0.571764	0.275439	0	-0.551174	0.619195	0	0	1404.5	Hcp family type VI secretion system effector
C_RS07510	10.2416	-0.569168	0.284928	0	-0.555155	0.834691	0	0	1406	DNA-binding transcriptional repressor BluR
C_RS01155	15.7327	-0.542295	0.366517	0	-0.614893	0.635	0	0	1407.5	LysR family transcriptional regulator
C_RS24610	8.72277	-0.481867	0.20522	0	-0.847266	0.467545	0	0	1407.5	ParB N-terminal domain-containing protein
C_RS10785	0.130693	-0.215194	0.268781	0	1.80949	3.35458	2	0.2	1409	crossover junction endodeoxyribonuclease RuvC
C_RS00595	8.97426	-0.478938	0.286007	0	-0.447987	1.24995	1	0.1	1410	prepilin peptidase-dependent pilin
C_RS19215	15.7663	-0.503627	0.459013	1	-0.405264	0.388977	0	0.1	1411	16S rRNA (cytosine(967)-C(5))-methyltransferase RsmB
C_RS01650	15.8158	-0.513987	0.187875	0	-0.68821	0.453867	0	0	1412	TolC family protein
C_RS01055	9.7505	-0.512858	0.387685	0	-0.693972	0.906468	0	0	1413	YaeQ family protein
C_RS24290	2.68515	-0.270392	0.129193	0	-1.16266	1.40471	2	0.2	1414	N-acetyltransferase
C_RS22500	26.8436	-0.793355	0.201145	0	-0.356332	0.637653	0	0	1415	cytosine permease
C_RS04875	0.809901	-0.234802	0.0934857	0	-1.58122	1.91689	2	0.2	1416	serine--tRNA ligase
C_RS12685	10.8436	-0.683791	0.195789	0	-0.414297	0.895399	0	0	1417.5	cytidine deaminase
C_RS17980	15.2317	-0.650649	0.383609	0	-0.441541	0.820621	0	0	1417.5	glutathionylspermidine synthase family protein
C_RS08285	1.36238	-0.368279	0.251737	0	-0.946763	1.88955	1	0.1	1419	peptide ABC transporter permease SapC
C_RS22865	3.12871	-0.305649	0.0594311	0	-0.437198	2.09835	3	0.3	1420	helix-turn-helix domain-containing protein
C_RS23745	0.607921	-0.179891	0.16153	0	-1.9304	1.59667	2	0.2	1421	repressor LexA
C_RS06475	9.24356	-0.805749	0.537793	1	0.190228	0.882664	0	0.1	1422	NADH-quinone dehydrogenase
C_RS13535	16.798	-0.863126	0.861503	1	-0.17502	0.821316	0	0.1	1423.5	lysine/arginine/ornithine ABC transporter substrate-binding protein ArgT
C_RS09340	0.607921	-0.334924	0.257661	0	1.67504	0.461815	1	0.1	1423.5	Tat proofreading chaperone DmsD
C_RS29130	0.631683	-0.159956	0.0604068	0	-1.98573	1.467	2	0.2	1425	DUF3927 family protein
C_RS16400	23.0396	-0.591613	0.371388	0	-0.504842	0.379582	0	0	1426	EF2563 family selenium-dependent molybdenum hydroxylase system protein
C_RS04095	0.851485	-0.184854	0.10188	0	-1.86265	1.78064	2	0.2	1427	molybdopterin synthase sulfur carrier subunit
C_RS07195	8.68911	-0.519303	0.203832	0	-0.660101	0.374963	0	0	1428	DUF2528 family protein
C_RS15660	34.9366	-0.67873	0.393245	0	-0.414526	0.33569	0	0	1429	DNA mismatch repair protein MutS
C_RS21805	0.994059	-0.0137918	0.00970001	0	-2.54343	1.84644	2	0.2	1430	DNA polymerase III subunit beta
C_RS18435	9.1802	-0.346449	0.101702	0	1.29505	3.19523	1	0.1	1431	type II toxin-antitoxin system ribonuclease toxin YhaV
C_RS03835	10.1248	-0.616485	0.453925	0	-0.46993	0.949467	0	0	1432	tol-pal system-associated acyl-CoA thioesterase
C_RS13790	12.0634	-0.614752	0.219982	0	-0.470231	0.388896	0	0	1433	transporter YfdV
C_RS02055	13.5683	-0.616503	0.432296	0	-0.46801	0.848009	0	0	1434	DUF1116 domain-containing protein
C_RS23750	22.7347	-0.600386	0.307938	0	-0.487154	0.54443	0	0	1435.5	MATE family efflux transporter DinF
C_RS05585	6.0099	-0.480791	0.136733	0	-0.804376	0.805955	0	0	1435.5	DUF3261 domain-containing protein
C_RS18540	2.62376	-0.28803	0.132893	0	-0.944117	1.66844	2	0.2	1437	YhbP family protein
C_RS09840	49.2238	-1.18512	0.512158	1	0.135535	0.480051	0	0.1	1438.5	FAD-binding oxidoreductase
C_RS17390	26.4277	-0.703158	0.478479	1	-0.224365	0.520083	0	0.1	1438.5	IS66 family transposase
C_RS04595	5.7505	-0.423186	0.255909	0	-0.572048	1.04529	1	0.1	1440	phage major tail tube protein
C_RS21870	10.1188	-0.519861	0.0703171	0	-0.650146	0.395137	0	0	1441	class I chromate reductase YieF
C_RS11465	9.82376	-0.4315	0.445623	0	-0.54245	1.0712	1	0.1	1442	DgsA anti-repressor MtfA
C_RS19470	1.29703	-1.02221	0.608918	1	0.0175091	2.1219	1	0.2	1443	elongation factor Tu
C_RS12060	9.49109	-0.512381	0.11498	0	-0.670491	0.801899	0	0	1444	LysR family transcriptional regulator
C_RS00985	0.990099	-0.0137918	0.00970001	0	-2.41485	1.85942	2	0.2	1445	outer membrane protein assembly factor BamA
C_RS23660	10.8218	-0.576263	0.349412	0	-0.521096	0.382256	0	0	1446	YjbF family lipoprotein
C_RS24600	8.95842	-0.484899	0.167051	0	-0.76636	0.827068	0	0	1447	hypothetical protein
C_RS14640	1.24158	-0.131752	0.0385352	0	-1.93482	1.5435	2	0.2	1448	type I toxin-antitoxin system toxin ShoB
C_RS18035	1.25743	-0.23889	0.132014	0	-1.38877	2.54528	2	0.2	1449	3,4-dihydroxy-2-butanone-4-phosphate synthase
C_RS05085	6.70099	-0.589802	0.262947	0	-0.498103	0.964744	0	0	1450	NADPH-dependent FMN reductase
C_RS03710	35.598	-0.861948	0.554461	1	-0.170426	0.366775	0	0.1	1451	dipeptide permease DtpD
C_RS01770	21.5584	-0.690077	0.242151	0	-0.39886	0.240161	0	0	1452	esterase FrsA
C_RS22125	0.738614	-0.182291	0.108687	0	-1.71849	2.41717	2	0.2	1453	ilv operon leader peptide
C_RS20460	23.8317	-0.630487	0.287978	0	-0.446146	0.408635	0	0	1454	alpha,alpha-trehalase TreF
C_RS22845	7.06733	-0.526209	0.228148	0	-0.620435	0.896028	0	0	1455.5	D-tyrosyl-tRNA(Tyr) deacylase
C_RS15485	11.9762	-0.449913	0.176849	0	-0.964929	0.440981	0	0	1455.5	lytic murein transglycosylase B
C_RS06305	11.4653	-0.620993	0.372216	0	-0.454785	0.612801	0	0	1457	flagellar hook assembly protein FlgD
C_RS03180	11.2099	-0.586517	0.292783	0	-0.497018	0.668454	0	0	1458	enterobactin biosynthesis bifunctional isochorismatase/aryl carrier protein EntB
C_RS25680	12.8436	-0.645327	0.368555	0	-0.427114	0.588895	0	0	1459	GntR family transcriptional regulator
C_RS02200	6.6099	-0.415214	0.235021	0	-0.589855	1.30683	1	0.1	1460.5	taurine ABC transporter permease TauC
C_RS17695	5.28911	-0.37011	0.233499	0	-0.872815	1.19417	1	0.1	1460.5	HyaD/HybD family hydrogenase maturation endopeptidase
C_RS04365	6.58812	-0.423143	0.253151	0	-0.55606	1.03745	1	0.1	1462	glutathione S-transferase GstB
C_RS24905	6.51287	-0.363577	0.0528068	0	-0.932645	1.12888	1	0.1	1463	DUF1190 domain-containing protein
C_RS08615	7.61782	-0.496777	0.254769	0	-0.706501	1.08121	0	0	1464	phosphatidate cytidylyltransferase
C_RS16650	7.20792	-0.506355	0.308574	0	-0.670509	0.567529	0	0	1465	DNA-binding protein
C_RS03430	15.2376	-0.801146	0.380043	1	-0.180424	0.541658	0	0.1	1466	glutamate/aspartate ABC transporter permease GltK
C_RS03520	12.9109	-0.491176	0.316816	0	-0.721815	0.65461	0	0	1467	ribonucleotide monophosphatase NagD
C_RS25120	26.2733	-0.590033	0.336985	0	0.48661	0.404345	0	0	1468	autotransporter assembly complex protein TamA
C_RS08795	5.42574	-0.401967	0.184144	0	-0.635817	1.6707	1	0.1	1469	L-methionine sulfoximine/L-methionine sulfone acetyltransferase
C_RS20890	2.32673	-0.360109	0.042066	0	-0.96415	1.53636	1	0.1	1470	DUF3251 domain-containing protein
C_RS25310	0.279208	-0.0704005	0.0730931	0	-1.84	0.374798	2	0.2	1471	LPS export ABC transporter permease LptF
C_RS02680	51.1446	-0.800142	0.379258	1	-0.17797	0.245527	0	0.1	1472	mechanosensitive channel MscK
C_RS29710	6.4099	-0.501174	0.302881	0	-0.67736	1.10549	0	0	1473	hypothetical protein
C_RS23695	21.2416	-0.565696	0.18255	0	-0.515168	0.559715	0	0	1474	maltose ABC transporter permease MalF
C_RS07945	15.101	-0.705791	0.25869	0	-0.377577	0.368071	0	0	1475	patatin-like phospholipase RssA
C_RS06390	0.283168	-0.0137918	0.00970001	0	-2.0579	0.347536	2	0.2	1476	ACP S-malonyltransferase
C_RS15615	9.4198	-0.520284	0.332462	0	-0.61999	0.802723	0	0	1477	formate hydrogenlyase regulator HycA
C_RS00360	2.30495	-0.356542	0.159951	0	-0.986103	1.61565	1	0.1	1478	hypothetical protein
C_RS15500	3.79802	-0.401319	0.18029	0	-0.63094	1.30286	1	0.1	1479.5	PTS glucitol/sorbitol transporter subunit IIA
C_RS15550	4.29109	-0.345456	0.106764	0	-1.16127	0.669605	1	0.1	1479.5	hypothetical protein
C_RS13500	13.501	-0.736454	0.487663	1	-0.197698	1.02558	0	0.1	1481.5	GSH-dependent disulfide bond oxidoreductase
C_RS29335	1.56832	-0.326735	0.161693	0	-1.67386	2.06729	1	0.1	1481.5	membrane protein YoeI
C_RS19205	0.283168	-0.240352	0.255792	0	1.24267	2.33474	2	0.2	1483	peptide deformylase
C_RS18200	52.6594	-0.785427	0.34987	0	-0.337212	0.197434	0	0	1484	beta-galactosidase subunit alpha
C_RS10860	24.6515	-0.748214	0.569614	1	0.192078	0.791221	0	0.1	1485	flagellar biosynthesis protein FlhA
C_RS17195	15.1644	-0.512915	0.203189	0	-0.633561	0.566134	0	0	1486	hypothetical protein
C_RS23495	13.5901	-0.505413	0.280449	0	-0.656119	0.828477	0	0	1487	phosphoribosylamine--glycine ligase
C_RS07910	9.7604	-0.47479	0.169607	0	-0.761614	0.591055	0	0	1488	inositol phosphorylceramide synthase
C_RS04070	14.0594	-0.555843	0.240574	0	-0.532658	0.734624	0	0	1489	uridine diphosphate-N-acetylglucosamine-binding protein YvcK
C_RS23820	12.1782	-0.600627	0.299389	0	-0.460574	0.720245	0	0	1490	nicotinamide mononucleotide transporter
C_RS21645	20.1564	-0.827574	0.295282	0	-0.3187	0.478155	0	0	1491.5	signal transduction histidine-protein kinase/phosphatase UhpB
C_RS09410	15.2515	-0.53133	0.290198	0	-0.580266	0.604732	0	0	1491.5	DUF1471 domain-containing protein
C_RS00575	0.568317	-0.219217	0.0782903	0	-1.36167	1.30852	2	0.2	1493	dephospho-CoA kinase
C_RS10570	3.30099	-0.371469	0.293915	0	-0.81363	2.25227	1	0.1	1494	YebO family protein
C_RS23430	13.8832	-0.586782	0.129299	0	-0.476366	0.248106	0	0	1495	thiazole biosynthesis adenylyltransferase ThiF
C_RS13970	11.2871	-0.591555	0.29479	0	-0.470853	0.680624	0	0	1496	xanthosine phosphorylase
C_RS20010	9.02178	-0.42908	0.109463	0	-1.09057	0.429358	0	0	1497	quercetin 2,3-dioxygenase
C_RS18180	24.0832	-0.595529	0.349626	0	-0.463142	0.538076	0	0	1498	aerotaxis sensor receptor Aer
C_RS19880	6.51089	-0.518446	0.271572	0	-0.348209	1.1963	1	0.1	1499	DeoR/GlpR family transcriptional regulator
C_RS18300	8.11485	-0.578528	0.33403	0	-0.485056	0.72205	0	0	1500	EnvZ/OmpR regulon moderator MzrA
C_RS16665	4.27327	-0.355205	0.144836	0	-0.963928	1.3429	1	0.1	1501	energy-coupling factor ABC transporter ATP-binding protein
C_RS00480	1.60594	-0.33303	0.142752	0	-1.37997	2.28236	1	0.1	1502	UDP-N-acetylmuramoyl-tripeptide--D-alanyl-D- alanine ligase
C_RS28235	2.14059	-0.343181	0.0536723	0	-1.16087	1.96747	1	0.1	1503	hypothetical protein
C_RS22660	0.30099	-0.187355	0.0477546	0	0.591528	2.65894	3	0.3	1504	menaquinone-dependent protoporphyrinogen IX dehydrogenase
C_RS02725	23.2238	-0.804853	0.603771	1	-0.170403	0.791436	0	0.1	1505.5	molecular chaperone HtpG
C_RS14185	3.82178	-0.430907	0.108625	0	-0.504447	1.58949	1	0.1	1505.5	ethanolamine utilization acetate kinase EutP
C_RS00505	0.247525	-0.0137918	0.00970001	0	-1.90568	0.257198	2	0.2	1507	UDP-N-acetylmuramate--L-alanine ligase
C_RS11805	8.40594	-0.513062	0.236357	0	-0.623082	0.734346	0	0	1508	bifunctional hydroxymethylpyrimidine kinase/phosphomethylpyrimidine kinase
C_RS08675	18.3743	-0.600577	0.533916	1	-0.261458	0.635517	0	0.1	1509	VOC family protein
C_RS08565	50.4376	-1.10293	0.235194	1	-0.123167	0.248822	0	0.1	1510	pyruvate:ferredoxin (flavodoxin) oxidoreductase
C_RS20775	18.8238	-0.759169	0.208365	0	-0.340794	0.394006	0	0	1511	3-dehydro-L-gulonate 2-dehydrogenase
C_RS15145	3.19802	-0.328404	0.086921	0	-1.52453	0.519948	1	0.1	1512	cold shock-like protein CspB
C_RS04760	22.0891	-0.839811	0.454905	1	-0.158921	0.400765	0	0.1	1513	NADH oxidoreductase
C_RS03615	0.253465	-0.0137918	0.00970001	0	-1.87075	0.383727	2	0.2	1514	fur leader peptide
C_RS11240	35.8277	-0.887613	0.435275	1	-0.147947	0.270583	0	0.1	1515.5	cellulose biosynthesis regulator YedQ
C_RS10630	4.05545	-0.362961	0.256859	0	-0.87881	1.00408	1	0.1	1515.5	DUF1480 family protein
C_RS01270	7.6297	-0.483557	0.175537	0	-0.705116	0.92358	0	0	1517	toxin
C_RS06545	5.00792	-0.381408	0.15575	0	-0.713639	1.51892	1	0.1	1518	DUF3592 domain-containing protein
C_RS01475	5.59802	-0.508817	0.310176	0	-0.355736	1.77552	1	0.1	1519	gluconate 5-dehydrogenase
C_RS02905	13.0812	-0.5773	0.343995	0	-0.479418	1.01288	0	0	1520	(S)-ureidoglycine aminohydrolase
C_RS23080	8.34455	-0.516414	0.260473	0	0.607812	0.650564	0	0	1521	HslU--HslV peptidase ATPase subunit
C_RS13035	5.47129	-0.337919	0.122796	0	-1.21056	0.910726	1	0.1	1522	ferredoxin-type protein NapF
C_RS21705	25.1842	-0.535659	0.144308	0	-0.550832	0.291208	0	0	1523	solute:sodium symporter family transporter
C_RS02120	19.5485	-0.82971	0.308639	0	-0.307421	0.647799	0	0	1524	cytosine permease
C_RS13735	5.10297	-0.459085	0.168011	0	-0.814001	0.688779	0	0	1525	LuxR family transcriptional regulator
C_RS16795	8.96436	-0.495291	0.244381	0	-0.663598	0.565241	0	0	1526	pyridoxal phosphate homeostasis protein
C_RS01010	0.257426	-0.0137918	0.00970001	0	-1.77677	0.249705	2	0.2	1527	lipid-A-disaccharide synthase
C_RS04565	6.20396	-0.363407	0.211763	0	-0.853022	1.17718	1	0.1	1528	baseplate assembly protein
C_RS17460	8.41188	-0.53687	0.234988	0	-0.542215	0.715702	0	0	1529	type IV toxin-antitoxin system AbiEi family antitoxin domain-containing protein
C_RS29150	0.772277	-0.193554	0.0227433	0	-1.3562	1.71943	2	0.2	1530	host cell division inhibitory peptide Kil
C_RS23780	35.9228	-0.623106	0.302933	0	-0.41882	0.309184	0	0	1532	FAD-binding protein
C_RS05815	9.32475	-0.470279	0.106731	0	-0.732481	0.685109	0	0	1532	fimbrial protein
C_RS16065	3.05149	-0.460755	0.401302	0	0.786222	0.495414	0	0	1532	type VI secretion system contractile sheath small subunit
C_RS21070	0.794059	-0.0137918	0.00970001	0	-1.7424	2.32002	2	0.2	1534	dUTP diphosphatase
C_RS21545	10.1267	-0.681266	0.425351	0	-0.370849	0.141871	0	0	1535	antirestriction protein
C_RS13045	6.31287	-0.477979	0.229245	0	-0.709228	0.695115	0	0	1536	serine protease inhibitor ecotin
C_RS20305	31.0554	-0.804491	0.519291	1	-0.162942	0.562796	0	0.1	1537	dipeptide/tripeptide permease DtpB
C_RS14605	26.7802	-0.902796	0.646284	2	-0.0106036	0.671096	0	0.2	1538	two component system sensor histidine kinase QseE/GlrK
C_RS20800	10.7485	-0.469274	0.281084	0	-0.732196	0.628059	0	0	1539	2,3-diketo-L-gulonate transporter substrate-binding protein YiaO
C_RS23435	12.9307	-0.561059	0.294278	0	-0.493085	0.794204	0	0	1540	thiamine phosphate synthase
C_RS13595	14.1723	-0.398985	0.156762	0	0.608003	0.974855	1	0.1	1541	MFS transporter
C_RS16370	27.1168	-0.623044	0.254654	0	-0.415253	0.267295	0	0	1542	sigma-54-dependent transcriptional regulator
C_RS10690	7.80198	-0.353065	0.182547	0	-0.92928	0.778838	1	0.1	1543	tellurite resistance TerB family protein
C_RS20405	1.96436	-0.261231	0.113728	0	-0.960092	1.51975	2	0.2	1544	acid-activated periplasmic chaperone HdeB
C_RS08360	14.501	-0.722435	0.252827	0	-0.346812	0.877596	0	0	1545	zinc-binding alcohol dehydrogenase
C_RS02115	19.8574	-0.618637	0.304115	0	-0.416068	0.576171	0	0	1546.5	propionate--CoA ligase
C_RS15855	11.3802	-0.490308	0.241216	0	-0.660837	0.489095	0	0	1546.5	7-carboxy-7-deazaguanine synthase QueE
C_RS28070	3.95842	-0.376302	0.295211	0	-0.713611	1.40637	1	0.1	1548	DUF905 family protein
C_RS20330	0.881188	-0.223026	0.150735	0	-0.537181	3.14451	3	0.3	1549	hypothetical protein
C_RS04795	15.7901	-0.835251	0.525009	1	0.149546	0.701203	0	0.1	1550	macrolide transporter subunit MacA
C_RS08025	18.4158	-0.526911	0.280576	0	-0.55419	0.814712	0	0	1551	voltage-gated potassium channel protein
C_RS10960	4.92079	-0.499226	0.247349	0	-0.626517	0.874121	0	0	1552	non-heme ferritin-like protein
C_RS21715	33.9842	-0.691224	0.261569	0	-0.358	0.355438	0	0	1553	putative transporter
C_RS02480	2.82376	-0.36024	0.0675173	0	-0.850549	0.856199	1	0.1	1554	nucleotide binding protein YajQ
C_RS01865	3.69505	-0.806653	0.393774	0	0.302857	0.472669	0	0	1555	ECP biosynthesis operon DNA-binding transcriptional regulator EcpR
C_RS22590	0.245545	-0.0452411	0.0654577	0	-1.4661	0.872694	2	0.2	1556	ubiquinone biosynthesis protein UbiJ
C_RS12030	5.34653	-0.494482	0.238653	0	-0.641366	1.07876	0	0	1557	DUF496 family protein
C_RS10270	23.4634	-0.915288	0.531852	1	-0.131226	0.374366	0	0.1	1558	asparaginase
C_RS03045	15.0119	-0.439778	0.0711225	0	0.45675	1.06208	1	0.1	1559	Cu(+)/Ag(+) efflux RND transporter outer membrane channel CusC
C_RS14660	7.97426	-0.590458	0.124161	0	-0.445447	0.932796	0	0	1560	DNA repair protein RecO
C_RS05420	1.88317	-0.28367	0.0773148	0	-0.800512	2.34057	2	0.2	1561	hypothetical protein
C_RS09745	31.4535	-0.760794	0.490111	1	-0.170428	0.490491	0	0.1	1562.5	FAD-NAD(P)-binding protein
C_RS25030	7.35644	-0.395289	0.130629	0	-0.610423	0.923	1	0.1	1562.5	enoyl-CoA hydratase/isomerase family protein
C_RS19805	22.1624	-0.556058	0.391176	0	-0.490927	0.334803	0	0	1564	RNA-binding transcriptional accessory protein
C_RS11725	7.26733	-0.345086	0.0595301	0	-0.989431	0.913925	1	0.1	1565	IS3 family transposase
C_RS09690	0.257426	-0.255324	0.0150046	0	-0.97112	1.69254	2	0.2	1566	stress response protein YnhF
C_RS03775	1.25743	-0.231996	0.198277	0	-1.10477	2.51136	2	0.2	1567	succinate dehydrogenase iron-sulfur subunit SdhB
C_RS15595	9.40792	-0.473878	0.276782	0	-0.694651	0.610001	0	0	1568	formate hydrogenlyase subunit HycD
C_RS12545	63.3921	-0.949989	0.302547	1	-0.124192	0.234429	0	0.1	1569	DUF4132 domain-containing protein
C_RS11670	37.8851	-1.12263	0.756994	1	-0.103406	0.689378	0	0.1	1570	colibactin polyketide synthase ClbI
C_RS15010	6.26139	-0.546092	0.289775	0	0.499864	0.817118	0	0	1571	phage minor tail protein L
C_RS07935	22.6059	-0.683465	0.262317	0	-0.356932	0.255506	0	0	1572.5	formyltetrahydrofolate deformylase
C_RS20820	13.8653	-0.635688	0.26072	0	-0.390395	0.476336	0	0	1572.5	L-ribulose-5-phosphate 4-epimerase
C_RS13505	9.67921	-0.598155	0.304488	0	-0.429741	0.891018	0	0	1574	dihydroneopterin triphosphate 2'-epimerase
C_RS16775	4.78614	-0.779677	0.488752	1	-0.162102	0.890948	0	0.1	1575	glutathione synthase
C_RS28490	11.8733	-0.505253	0.107409	0	-0.601644	0.160154	0	0	1576	replication protein
C_RS14150	8.49505	-0.382963	0.168972	0	-0.655783	0.889392	1	0.1	1577	ethanolamine utilization protein EutJ
C_RS13780	45.4218	-0.972542	0.604272	1	-0.117404	0.43398	0	0.1	1578	acid-sensing system histidine kinase EvgS
C_RS03025	50.2416	-0.758294	0.448238	1	-0.166514	0.332135	0	0.1	1579	bacteriophage adsorption protein NfrA
C_RS06050	6.04554	-0.408782	0.157668	0	-1.17309	0.644706	0	0	1580	toxin
C_RS07885	13.2931	-0.636542	0.434058	0	-0.385759	0.985944	0	0	1581.5	respiratory nitrate reductase subunit gamma
C_RS05055	17.1485	-0.508767	0.302272	0	-0.586584	0.707724	0	0	1581.5	nicotinate phosphoribosyltransferase
C_RS17825	14.0495	-0.530312	0.490241	1	0.304218	1.19407	0	0.1	1583	Ldh family oxidoreductase
C_RS29175	0.308911	-0.0137918	0.00970001	0	-1.52556	1.17467	2	0.2	1584	hypothetical protein
C_RS12795	3.44752	-0.327889	0.104252	0	-1.25235	1.57299	1	0.1	1585	transcriptional regulator YeiL
C_RS13800	19.2733	-0.665489	0.289289	0	-0.363945	0.45146	0	0	1586	formyl-CoA transferase
C_RS10610	9.19802	-0.530838	0.37457	0	-0.526631	1.0441	0	0	1587	L-methionine (R)-S-oxide reductase
C_RS13895	22.4871	-0.944681	0.341912	0	-0.261974	0.859138	0	0	1588.5	Nramp family divalent metal transporter
C_RS07620	9.6198	-0.49103	0.240735	0	-0.629958	0.337212	0	0	1588.5	YcgN family cysteine cluster protein
C_RS16805	3.49109	-0.3919	0.146427	0	0.609023	1.3005	1	0.1	1590	YggU family protein
C_RS02465	9.85743	-0.623516	0.425998	1	0.224671	0.503906	0	0.1	1591	tRNA 4-thiouridine(8) synthase ThiI
C_RS05430	8.27525	-0.532479	0.320107	0	-0.516333	1.14926	0	0	1592	FTR1 family protein
C_RS00870	14.5881	-0.581197	0.194085	0	-0.442838	0.609881	0	0	1593	Fe(3+)-hydroxamate ABC transporter permease FhuB
C_RS04220	1.86139	-0.378084	0.248577	0	-0.672308	2.25075	1	0.1	1594.5	glutamine ABC transporter ATP-binding protein GlnQ
C_RS02495	2.87525	-0.330576	0.0731447	0	-1.18067	1.32796	1	0.1	1594.5	cytochrome o ubiquinol oxidase subunit IV
C_RS25395	5.90693	-0.38591	0.173426	0	-0.632337	0.835206	1	0.1	1596	hypothetical protein
C_RS14735	8.31683	-0.582543	0.128816	0	-0.439465	0.823543	0	0	1597.5	autonomous glycyl radical cofactor GrcA
C_RS18675	5.87327	-0.490708	0.350103	0	-0.626132	0.827061	0	0	1597.5	ribosome assembly RNA-binding protein YhbY
C_RS14295	5.91287	-0.490194	0.201018	0	-0.626748	0.793889	0	0	1599	thioredoxin-dependent thiol peroxidase
C_RS02210	0.366337	-0.0137918	0.00970001	0	-1.4772	1.23157	2	0.2	1600	porphobilinogen synthase
C_RS09485	8.16832	-0.456654	0.250571	0	-0.735569	0.621233	0	0	1601.5	7-alpha-hydroxysteroid dehydrogenase
C_RS11070	9.80396	-0.449333	0.221316	0	-0.770983	0.692977	0	0	1601.5	flagella biosynthesis regulatory protein FliZ
C_RS18015	8.01386	-0.425492	0.123931	0	-0.945719	0.419428	0	0	1603	fimbrial-like protein
C_RS07115	9.30891	-0.51217	0.373891	0	-0.326091	1.57984	1	0.1	1604	hypothetical protein
C_RS04540	4.21386	-0.52285	0.208667	0	-0.538131	1.25551	0	0	1605	LysB family phage lysis regulatory protein
C_RS10755	8.34059	-0.48417	0.217355	0	-0.639722	0.295282	0	0	1606	zinc ABC transporter substrate-binding protein ZnuA
C_RS06090	8.40594	-0.442445	0.258078	0	0.818206	0.650945	0	0	1607	molecular chaperone YcdY
C_RS14890	0.447525	-0.0137918	0.00970001	0	-1.45088	1.78498	2	0.2	1608	signal recognition particle protein
C_RS19625	12.3327	-0.512248	0.141595	0	-0.563174	0.526541	0	0	1609.5	uroporphyrinogen-III C-methyltransferase
C_RS11750	8.78614	-0.448466	0.280825	0	-0.766965	0.572549	0	0	1609.5	bifunctional adenosylcobinamide kinase/adenosylcobinamide-phosphate guanylyltransferase
C_RS07785	0.267327	-0.0137918	0.00970001	0	-1.44312	1.34729	2	0.2	1611	lipoprotein localization protein LolB
C_RS14740	14.0198	-0.510756	0.145578	0	-0.566806	0.359685	0	0	1612	uracil-DNA glycosylase
C_RS20530	34.0495	-0.716328	0.399313	1	-0.17581	0.332232	0	0.1	1613	cellulose biosynthesis cyclic di-GMP-binding regulatory protein BcsB
C_RS03165	4.61188	-0.331754	0.139298	0	-1.12193	0.863912	1	0.1	1614	Fe2+-enterobactin ABC transporter substrate-binding protein
C_RS23830	17.4673	-0.49596	0.141481	0	-0.607496	0.393518	0	0	1615.5	aromatic amino acid transaminase
C_RS25065	10.0099	-0.459221	0.269823	0	-0.714128	0.7575	0	0	1615.5	iron-sulfur cluster repair protein YtfE
C_RS04995	13.1426	-0.603621	0.263073	0	-0.40834	0.706045	0	0	1617	envelope biogenesis factor ElyC
C_RS09755	16.2713	-0.628849	0.324947	0	-0.383096	0.363898	0	0	1618.5	thiosulfate reductase cytochrome B subunit
C_RS06490	6.09703	-0.461844	0.241838	0	-0.701003	0.955257	0	0	1618.5	TetR family copper-responsive transcriptional repressor ComR
C_RS05205	5.2	-0.367566	0.267843	0	-0.714467	1.13869	1	0.1	1620	heat shock protein HspQ
C_RS25610	2.66139	-0.488313	0.317656	0	-0.35452	1.67591	1	0.1	1621	endoribonuclease SymE
C_RS04625	3.01188	-0.448471	0.191637	0	0.237782	2.1762	2	0.2	1622	ogr/Delta-like zinc finger family protein
C_RS08950	12.9386	-0.683361	0.339051	0	-0.345978	0.429663	0	0	1623	formate dehydrogenase N subunit beta
C_RS23790	8.7505	-0.493152	0.213117	0	-0.607403	0.539056	0	0	1624	enoyl-CoA hydratase/isomerase family protein
C_RS23535	5.1901	-0.48456	0.302972	0	-0.624347	0.786799	0	0	1625	hypothetical protein
C_RS23775	18.4119	-0.540577	0.208177	0	-0.483121	0.331695	0	0	1626	quinone oxidoreductase
C_RS11575	29.7624	-0.687291	0.462286	1	-0.182764	0.620722	0	0.1	1627	AMP nucleosidase
C_RS24685	32.1703	-0.747301	0.244697	0	-0.306988	0.203468	0	0	1628	L-methionine/branched-chain amino acid transporter
C_RS15065	2.98812	-0.31774	0.229405	0	-1.37971	1.88624	1	0.1	1629	head decoration protein
C_RS24205	0.619802	-0.24474	0.126317	0	-0.927587	1.88027	2	0.2	1630	LpxT activity modulator PmrR
C_RS10685	44.9644	-0.681565	0.357518	0	-0.34283	0.160044	0	0	1631	oligopeptidase B
C_RS04845	1.85545	-0.325057	0.273374	0	-1.20413	2.24291	1	0.1	1632	cysteine/glutathione ABC transporter permease/ATP-binding protein CydD
C_RS15285	3.48911	-0.33042	0.111792	0	-1.09766	0.756629	1	0.1	1633	YqaE/Pmp3 family membrane protein
C_RS15560	10.5347	-0.580801	0.356656	0	-0.424941	0.813618	0	0	1634	type II toxin-antitoxin system HigB family toxin
C_RS08640	19.2653	-0.783204	0.357178	1	-0.147085	0.366834	0	0.1	1635	YdcF family protein
C_RS01530	12.7782	-0.618466	0.337358	0	-0.385075	1.02573	0	0	1636	ribokinase
C_RS09320	40.6416	-0.804403	0.36826	0	-0.281684	0.307867	0	0	1638.5	dimethyl sulfoxide reductase subunit A
C_RS03365	14.6891	-0.580936	0.287664	0	-0.424252	0.312521	0	0	1638.5	endolytic peptidoglycan transglycosylase RlpA
C_RS05160	11.2178	-0.524121	0.231094	0	-0.514755	0.547945	0	0	1638.5	cell division inhibitor SulA
C_RS23960	19.4337	-0.432155	0.185744	0	-0.850606	0.534575	0	0	1638.5	acetate--CoA ligase
C_RS19395	12.8554	-0.461233	0.125118	0	0.683674	0.345942	0	0	1641	type II secretion system protein GspC
C_RS23555	21.0495	-0.605671	0.196274	0	-0.397081	0.549675	0	0	1642	isocitrate lyase
C_RS14925	4.59406	-0.375683	0.116255	0	-0.651704	1.11337	1	0.1	1643	RnfH family protein
C_RS25480	9.70297	-0.445393	0.250957	0	-0.75283	0.548106	0	0	1644	type 1 fimbria minor subunit FimF
C_RS16850	19.5069	-0.645841	0.287479	0	-0.359187	0.315316	0	0	1645	A/G-specific adenine glycosylase
C_RS21485	3.99208	-0.365975	0.0911308	0	-0.696189	1.32879	1	0.1	1646	transposase
C_RS22740	4.87723	-0.400707	0.203616	0	-0.53633	1.35537	1	0.1	1647	Der GTPase-activating protein YihI
C_RS11475	23.6218	-0.667169	0.429777	0	-0.345902	0.627623	0	0	1648	tyrosine-type recombinase/integrase
C_RS25380	56.2257	-0.940597	0.296376	1	-0.104711	0.16986	0	0.1	1649	DEAD/DEAH box helicase family protein
C_RS12465	5.8396	-0.588294	0.359174	0	0.411199	0.729092	0	0	1650	GntR family transcriptional regulator
C_RS19620	13.2713	-0.497709	0.222193	0	-0.577505	0.320125	0	0	1651	nitrite transporter NirC
C_RS18955	23.7861	-0.556071	0.34584	0	-0.451447	0.205339	0	0	1652	metalloprotease TldD
C_RS10155	18.602	-0.723531	0.51422	1	-0.163372	0.519969	0	0.1	1653	succinylornithine/acetylornithine transaminase
C_RS29555	1.15446	-0.156567	0.101465	0	-1.10498	2.20501	2	0.2	1654	hypothetical protein
C_RS08945	51.5663	-0.754943	0.254582	0	0.296532	0.315921	0	0	1655	formate dehydrogenase-N subunit alpha
C_RS18600	0.594059	-0.180055	0.0584155	0	-0.508013	2.37357	3	0.3	1656	30S ribosomal protein S15
C_RS07295	5.68317	-0.382318	0.26404	0	-0.611279	1.31625	1	0.1	1657	crossover junction endodeoxyribonuclease RusA
C_RS10940	12.9525	-0.559989	0.343915	0	-0.443871	0.732465	0	0	1658	trehalose-phosphatase
C_RS09295	4.33069	-0.389165	0.251766	0	-0.58166	1.70851	1	0.1	1659	YnfA family protein
C_RS25885	21.2911	-0.765865	0.694521	1	-0.145856	0.653517	0	0.1	1660	energy-dependent translational throttle protein EttA
C_RS23955	7.45941	-0.443225	0.165057	0	-0.745257	0.813088	0	0	1661	DUF485 domain-containing protein
C_RS22030	27.7545	-0.717519	0.324288	0	-0.31358	0.342146	0	0	1662	ATPase RavA
C_RS14840	20.0277	-0.562891	0.23003	0	-0.436612	0.655351	0	0	1663	bifunctional chorismate mutase/prephenate dehydrogenase
C_RS19455	6.40792	-0.390328	0.0951	0	-1.33654	0.508422	0	0	1664	bacterioferritin
C_RS05270	16.6396	-0.76164	0.319346	0	-0.2895	0.745496	0	0	1665.5	cytochrome d ubiquinol oxidase subunit II
C_RS17820	16.3584	-0.561211	0.395315	0	-0.439277	0.540857	0	0	1665.5	zinc-binding alcohol dehydrogenase family protein
C_RS11775	28.5723	-0.812321	0.32626	0	-0.272211	0.410665	0	0	1667	phosphoadenosine phosphosulfate reductase
C_RS12785	23.996	-0.931558	0.37772	1	0.101086	0.750501	0	0.1	1668	sugar kinase
C_RS18320	4.52475	-0.395371	0.110872	0	-1.19158	0.328729	0	0	1669	YqjK-like family protein
C_RS07070	0.362376	-0.0137918	0.00970001	0	-1.20623	1.47528	2	0.2	1670	NADP-dependent isocitrate dehydrogenase
C_RS11400	5.73663	-0.432487	0.0572918	0	-0.787355	0.774145	0	0	1671	helix-hairpin-helix domain-containing protein
C_RS20515	26.4	-0.651	0.106047	0	-0.346186	0.275004	0	0	1672	biofilm formation regulator HmsP
C_RS06370	1.95248	-0.50533	0.125985	0	0.540357	1.11534	0	0	1673	23S rRNA accumulation protein YceD
C_RS04200	51.097	-1.21097	0.799464	1	-0.077035	0.292395	0	0.1	1674	catecholate siderophore receptor Fiu
C_RS10850	0.849505	-0.0137918	0.00970001	0	-1.19942	2.98481	2	0.2	1675	arginine--tRNA ligase
C_RS00530	0.578218	-0.180797	0.0625896	0	-1.01215	1.68311	2	0.2	1676	UDP-3-O-acyl-N-acetylglucosamine deacetylase
C_RS24100	4.60396	-0.278376	0.0927376	0	-0.709409	2.16165	2	0.2	1677.5	bifunctional allose-6-phosphate isomerase/ribose-5-phosphate isomerase RpiB
C_RS16785	1.31089	-0.157747	0.14289	0	-1.03794	2.61812	2	0.2	1677.5	Holliday junction resolvase RuvX
C_RS00075	7.47921	-0.642092	0.307361	0	-0.348994	1.01498	0	0	1679	DUF2541 family protein
C_RS24335	8.15446	-0.451925	0.263142	0	-0.681862	0.496276	0	0	1680	DUF4942 domain-containing protein
C_RS05755	25.6277	-0.473942	0.482332	1	0.350285	0.638996	0	0.1	1681	hypothetical protein
C_RS14465	7.42574	-0.429046	0.222103	0	-0.805552	0.711424	0	0	1682	enhanced serine sensitivity protein SseB
C_RS12070	5.69109	-0.360546	0.205769	0	-0.702824	1.1047	1	0.1	1683	type II toxin-antitoxin system mRNA interferase toxin YoeB
C_RS20920	3.63762	-0.463138	0.220639	0	-0.361659	1.6772	1	0.1	1684	serine O-acetyltransferase
C_RS03820	0.978218	-0.10839	0.0944723	0	1.05431	1.55186	2	0.2	1685	cytochrome d ubiquinol oxidase subunit II
C_RS05620	12.4099	-0.548084	0.235174	0	-0.446278	0.615179	0	0	1686	hypothetical protein
C_RS17640	20.2911	-0.603797	0.523006	1	-0.212205	0.58641	0	0.1	1687	hypothetical protein
C_RS18685	31.6436	-0.63522	0.449958	1	-0.19041	0.406032	0	0.1	1688	serine-type D-Ala-D-Ala carboxypeptidase
C_RS06315	8.18416	-0.5383	0.297706	0	-0.456259	1.19126	0	0	1689.5	flagellar basal-body rod protein FlgF
C_RS24095	14.1901	-0.466442	0.131079	0	-0.624916	0.318293	0	0	1689.5	als operon DNA-binding transcriptional repressorAlsR
C_RS21420	53.3881	-0.7992	0.28956	0	-0.267221	0.341977	0	0	1691	glycyl radical protein
C_RS25920	12.6871	-0.624718	0.402122	0	-0.356828	0.407466	0	0	1692	two-component system response regulator CreB
C_RS15650	4.67723	-0.352676	0.188303	0	-0.734332	0.846332	1	0.1	1693	TOBE domain-containing protein
C_RS14430	0.170297	-0.0434919	0.07541	0	1.0671	1.90238	2	0.2	1694	flavodoxin-dependent (E)-4-hydroxy-3-methylbut-2-enyl-diphosphate synthase
C_RS02240	14.7168	-0.478795	0.249019	0	-0.591409	0.283392	0	0	1695	surface-exposed outer membrane lipoprotein YaiW
C_RS00255	24.3604	-0.755297	0.420386	0	-0.2813	0.478263	0	0	1696	MFS transporter
C_RS10350	31.5307	-1.06144	0.25696	1	-0.0800108	0.34361	0	0.1	1697.5	protein kinase YeaG
C_RS11635	37.8297	-0.826971	0.37629	1	0.115388	0.3656	0	0.1	1697.5	precolibactin peptidase ClbP
C_RS17540	7.45941	-0.513977	0.265196	0	-0.500451	0.811	0	0	1699.5	GspM family type II secretion system protein YghD
C_RS18475	12.9723	-0.444798	0.244255	0	-0.698063	0.70664	0	0	1699.5	AgaS family sugar isomerase
C_RS28360	16.1881	-0.761649	0.425578	1	-0.135852	0.661589	0	0.1	1701	IS1 family transposase
C_RS15460	0.273267	-0.0422339	0.0726009	0	-1.05967	1.87858	2	0.2	1702	alanine--tRNA ligase
C_RS15870	14.903	-0.423444	0.238761	0	-0.816788	0.389889	0	0	1703	YgcG family protein
C_RS25425	13.8515	-0.493371	0.1658	0	-0.551046	0.634989	0	0	1704	N-acetylneuraminate epimerase
C_RS17645	23.2535	-0.667391	0.439551	1	0.172411	0.740803	0	0.1	1705	lipopolysaccharide biosynthesis protein
C_RS05245	14.9861	-0.508633	0.182117	0	-0.512352	0.166728	0	0	1706	Ni/Fe-hydrogenase b-type cytochrome subunit
C_RS12425	3.33663	-0.353638	0.072788	0	-0.401461	2.14594	2	0.2	1707	PTS galactitol transporter subunit IIA
C_RS10165	21.101	-0.72817	0.400479	0	-0.290132	0.580237	0	0	1708	TVP38/TMEM64 family protein
C_RS17725	5.9802	-0.503125	0.281878	0	-0.52798	0.808946	0	0	1709.5	DUF2623 domain-containing protein
C_RS04395	15.2851	-0.481038	0.24877	0	-0.57998	0.408086	0	0	1709.5	5-amino-6-(5-phospho-D-ribitylamino)uracil phosphatase
C_RS09310	10.1069	-0.549173	0.162966	0	-0.43604	0.881573	0	0	1711	YnfC family lipoprotein
C_RS01430	3.91683	-0.418795	0.17646	0	-0.843814	0.787091	0	0	1712	hemolysin activation protein
C_RS23755	5.73465	-0.397659	0.124993	0	-1.067	0.349916	0	0	1713	CsbD family protein
C_RS07690	3.01782	-0.339638	0.165408	0	-0.848357	1.00366	1	0.1	1714	GlsB/YeaQ/YmgE family stress response membrane protein
C_RS01620	88.5545	-0.817101	0.606663	1	0.113816	0.346498	0	0.1	1715	serine protease autotransporter toxin Pic
C_RS00650	6.71485	-0.476625	0.255723	0	-0.58902	0.490337	0	0	1716	bacteriocin immunity protein
C_RS04480	29.4653	-0.95883	0.275186	0	0.22509	0.101472	0	0	1717	hypothetical protein
C_RS07970	12.7366	-0.564637	0.302485	0	-0.40869	0.854444	0	0	1718	IS4 family transposase
C_RS21710	12.9485	-0.38257	0.233631	0	-0.567451	0.943045	1	0.1	1719	AraC family transcriptional regulator
C_RS16390	24.1624	-0.929711	0.3651	0	-0.22916	0.52069	0	0	1720	dihydropyrimidinase
C_RS04785	15.7584	-0.633563	0.58874	1	-0.0515304	1.31876	1	0.2	1721	ATP-dependent endonuclease
C_RS21120	8.51485	-0.634284	0.228589	0	-0.341841	0.850562	0	0	1722.5	bifunctional GTP diphosphokinase/guanosine-3',5'-bis pyrophosphate 3'-pyrophosphohydrolase
C_RS19915	9.5604	-0.401857	0.0886869	0	-0.988111	0.487257	0	0	1722.5	fimbrial protein
C_RS20910	22.895	-0.620083	0.423464	0	-0.353639	0.332567	0	0	1724	quinone-dependent L-lactate dehydrogenase
C_RS15885	0.287129	-0.0137918	0.00970001	0	-1.09502	1.59458	2	0.2	1725	CTP synthase (glutamine hydrolyzing)
C_RS16945	2.04752	-0.380987	0.149273	0	-0.571071	1.33612	1	0.1	1726	alpha-hemolysin-activating lysine-acyltransferase HlyC
C_RS23800	22.3327	-0.551609	0.259838	0	-0.420772	0.520361	0	0	1727	LacI family DNA-binding transcriptional regulator
C_RS06215	13.8554	-0.646992	0.382697	0	0.327419	0.655159	0	0	1728	cytochrome b
C_RS25655	29.0059	-0.791331	0.514544	1	-0.117105	0.27908	0	0.1	1729	methyl-accepting chemotaxis protein
C_RS19835	12.0436	-0.52918	0.217496	0	-0.456051	0.46228	0	0	1730	DNA utilization protein GntX
C_RS18895	18.7248	-0.601519	0.223839	0	-0.363093	0.274494	0	0	1731	cell division protein ZapE
C_RS11190	12.3426	-0.514418	0.256705	0	-0.481996	0.683884	0	0	1732	flagellar motor switch protein FliM
C_RS19390	36.8218	-0.768928	0.290972	0	-0.266189	0.321976	0	0	1733.5	type II secretion system protein GspA
C_RS21525	11.5743	-0.724984	0.35393	0	0.283541	0.42541	0	0	1733.5	WYL domain-containing protein
C_RS22265	34.0178	-0.746669	0.457002	0	-0.274531	0.372517	0	0	1735	amino acid permease
C_RS22055	15.3921	-0.545735	0.251871	0	-0.425686	0.723608	0	0	1736	ribose ABC transporter substrate-binding proteinRbsB
C_RS16595	0.659406	-0.0137918	0.00970001	0	-1.05928	2.14248	2	0.2	1737	ribose-5-phosphate isomerase RpiA
C_RS12835	1.44752	-0.196503	0.0912384	0	-0.894746	2.45155	2	0.2	1738	YkgJ family cysteine cluster protein
C_RS24485	9.5901	-0.439608	0.271627	0	-0.683751	0.718265	0	0	1739	P fimbrial tip protein PapF
C_RS00405	7.79406	-0.440299	0.388902	0	-0.382035	1.14119	1	0.1	1740	3-isopropylmalate dehydratase small subunit
C_RS03955	14.4257	-0.647088	0.180702	0	-0.325296	0.702058	0	0	1741	UDP-glucose 4-epimerase GalE
C_RS01565	21.9248	-0.861938	0.328164	0	-0.236675	0.297207	0	0	1743	LacI family DNA-binding transcriptional regulator
C_RS23490	20.5564	-0.557911	0.175097	0	-0.408421	0.326602	0	0	1743	sigma-54-dependent response regulator transcription factor ZraR
C_RS10055	9.09505	-0.452656	0.233654	0	-0.633244	0.528775	0	0	1743	metal-dependent hydrolase
C_RS08720	22.9584	-0.805831	0.461862	1	-0.109256	0.37982	0	0.1	1745	BenE family transporter YdcO
C_RS18335	7.10099	-0.409771	0.184429	0	-0.450127	1.40789	1	0.1	1746	DUF805 domain-containing protein
C_RS05610	8.54455	-0.514405	0.307792	0	-0.477908	0.821821	0	0	1747	hypothetical protein
C_RS25385	15.9782	-0.463444	0.217783	0	-0.597807	0.483065	0	0	1748	WYL domain-containing protein
C_RS00325	38.1663	-0.735765	0.388137	1	0.134513	0.227278	0	0.1	1749	RNA polymerase-associated protein RapA
C_RS20390	19.002	-0.527345	0.302794	0	-0.453244	0.188961	0	0	1750	iron ABC transporter permease
C_RS02070	16.9782	-0.670547	0.493202	0	-0.306757	0.648211	0	0	1751.5	amidohydrolase family protein
C_RS01555	6.26733	-0.390728	0.149396	0	-1.08667	0.621259	0	0	1751.5	PTS sugar transporter subunit IIB
C_RS04460	39.7762	-0.801415	0.472253	1	-0.108441	0.31959	0	0.1	1753	replication endonuclease
C_RS29545	2.20792	-0.333526	0.0716455	0	-0.854942	1.87808	1	0.1	1754	hypothetical protein
C_RS15530	20.5327	-0.665767	0.413221	0	-0.307808	0.613776	0	0	1755.5	anaerobic nitric oxide reductase flavorubredoxin
C_RS24380	3.0396	-0.406147	0.135358	0	-0.886579	0.679261	0	0	1755.5	RadC family protein
C_RS04910	41.8515	-0.811864	0.56011	1	-0.104384	0.497718	0	0.1	1757	formate C-acetyltransferase
C_RS25865	16.0574	-0.560852	0.269442	0	-0.399142	0.560038	0	0	1758	DNA repair protein RadA
C_RS02340	22.4871	-0.793564	0.389561	0	-0.250431	0.612086	0	0	1759	exonuclease subunit SbcD
C_RS10020	2.96436	-0.449397	0.349194	0	0.0646492	2.31043	3	0.3	1760	hypothetical protein
C_RS29160	2.77624	-0.334575	0.165186	0	-0.839618	1.21058	1	0.1	1761	DUF1364 domain-containing protein
C_RS11430	8.09703	-0.461195	0.0729089	0	-0.599502	0.20394	0	0	1762	hypothetical protein
C_RS04655	13.2079	-0.528653	0.238734	0	-0.446725	0.360806	0	0	1763	30S ribosomal protein S6--L-glutamate ligase
C_RS07765	5.53267	-0.427155	0.201736	0	-0.723105	0.631792	0	0	1764	stress-induced protein YchH
C_RS26120	5.2	-0.447634	0.163624	0	-0.638598	0.712507	0	0	1765	DUF957 domain-containing protein
C_RS20670	2.60594	-0.307059	0.169015	0	-1.1792	1.67875	1	0.1	1766	HTH-type transcriptional regulator
C_RS17735	16.2634	-0.532839	0.269328	0	-0.437301	0.396729	0	0	1767	L-glyceraldehyde 3-phosphate reductase
C_RS11105	4.5901	-0.406195	0.15906	0	-0.871989	0.60419	0	0	1768	lipoprotein
C_RS24785	0.146535	-0.0137918	0.00970001	0	0.99968	1.56706	2	0.2	1769	small ribosomal subunit biogenesis GTPase RsgA
C_RS06145	11.1782	-0.489378	0.296971	0	-0.52754	0.33416	0	0	1770	O-acetyl-ADP-ribose deacetylase
C_RS19560	5.36832	-0.417235	0.258186	0	-0.770225	1.05659	0	0	1771	OsmC family protein
C_RS14410	0.277228	-0.206822	0.049236	0	-0.842437	1.68671	2	0.2	1772	ribosome biogenesis GTPase Der
C_RS13685	3.24356	-0.377537	0.0939723	0	-1.26067	0.624265	0	0	1773	phosphohistidine phosphatase SixA
C_RS28735	1.50693	-0.298759	0.169092	0	-1.30451	1.91257	1	0.1	1774	membrane protein YpdK
C_RS24030	25.2277	-0.55978	0.32112	0	-0.396052	0.469761	0	0	1775	ABC transporter substrate-binding protein
C_RS29230	1.46535	-0.270583	0.0921266	0	0.65889	1.86706	2	0.2	1776	hypothetical protein
C_RS02740	15.6376	-0.593176	0.309524	0	-0.358947	0.614072	0	0	1777	acetyl esterase
C_RS24225	27.602	-0.63014	0.277546	0	-0.326782	0.2204	0	0	1779	arginine/agmatine antiporter
C_RS01490	11.4337	-0.444964	0.274863	0	-0.64045	0.58373	0	0	1779	exopolygalacturonate lyase
C_RS02190	10.2733	-0.43315	0.22798	0	-0.682455	0.782277	0	0	1779	taurine ABC transporter substrate-binding protein
C_RS08280	0.964356	-0.261496	0.0754589	0	-0.683373	1.56255	2	0.2	1781	peptide ABC transporter ATP-binding protein SapD
C_RS28820	0.671287	-0.418105	0.266485	0	0.756439	0.70849	0	0	1782	protein YrbN
C_RS09080	42.7149	-0.807533	0.66441	1	0.0993076	0.454295	0	0.1	1783	fimbrial biogenesis outer membrane usher protein
C_RS03050	1.51287	-0.300178	0.218003	0	-1.22664	1.94241	1	0.1	1784	Cu(+)/Ag(+) efflux RND transporter periplasmic metallochaperone CusF
C_RS11680	21.3505	-0.721467	0.402691	1	-0.130585	0.521217	0	0.1	1785	colibactin biosynthesis acyltransferase ClbG
C_RS12225	5.46535	-0.387254	0.0944246	0	-1.06161	0.845087	0	0	1786	GDP-mannose mannosyl hydrolase
C_RS15915	25.9366	-0.646052	0.28939	0	-0.309355	0.348694	0	0	1787.5	glucarate dehydratase
C_RS20385	6.50891	-0.385881	0.135145	0	-1.08071	0.649355	0	0	1787.5	anaerobilin reductase
C_RS21480	28.3406	-0.647575	0.117607	0	-0.307453	0.360692	0	0	1789.5	multidrug efflux RND transporter permease subunit
C_RS21580	14.8535	-0.468826	0.188408	0	-0.557082	0.400647	0	0	1789.5	DUF4942 domain-containing protein
C_RS13755	33.1822	-1.01711	0.460541	1	-0.0655898	0.325831	0	0.1	1791	D-serine transporter DsdX
C_RS13415	2.93069	-0.379371	0.125912	0	-1.18454	0.744563	0	0	1792	NADH-quinone oxidoreductase subunit C/D
C_RS16080	6.14851	-0.414605	0.10444	0	-0.767214	0.668268	0	0	1793	DotU family type IV/VI secretion system protein
C_RS21660	6.55248	-0.379314	0.163866	0	-0.537462	1.07525	1	0.1	1794	hypothetical protein
C_RS06015	3.20792	-0.457991	0.134309	0	-0.179912	1.53012	2	0.2	1795	RadC family protein
C_RS16250	2.96238	-0.365603	0.247002	0	-0.590386	1.3228	1	0.1	1796	RNA pyrophosphohydrolase
C_RS21750	26.8099	-0.612695	0.37222	0	-0.332954	0.649726	0	0	1797	MFS transporter
C_RS25775	8.77228	-0.570338	0.288879	0	-0.369954	0.636931	0	0	1798	pyrimidine 5'-nucleotidase
C_RS17625	22.598	-0.865172	0.553314	1	-0.0824692	0.350004	0	0.1	1799	LPS export ABC transporter permease LptG
C_RS24060	0.491089	-0.466839	0.239737	0	0.167955	2.33477	2	0.2	1800	hypothetical protein
C_RS04335	12.0673	-0.623571	0.306029	0	-0.323785	0.544394	0	0	1801	glutathione ABC transporter permease GsiD
C_RS18795	3.53267	-0.29059	0.0842002	0	-1.35369	0.65244	1	0.1	1802	PTS IIA-like nitrogen regulatory protein PtsN
C_RS04895	11.9584	-0.546345	0.272609	0	-0.399357	0.686266	0	0	1803	hydrolase
C_RS05760	7.40792	-0.464799	0.138119	0	-0.557724	0.779806	0	0	1804	toxin-activating lysine-acyltransferase
C_RS08330	1.88515	-0.446919	0.20785	0	0.613792	0.861169	0	0	1805	phage shock protein PspD
C_RS17990	16.5347	-0.643464	0.347332	0	-0.304287	0.627627	0	0	1806	thiol:disulfide interchange protein DsbA/DsbL
C_RS05650	14.703	-0.566178	0.149	0	-0.370098	0.510051	0	0	1807	hypothetical protein
C_RS25080	4.49109	-0.353767	0.265907	0	-0.642469	1.15963	1	0.1	1808	winged helix-turn-helix transcriptional regulator
C_RS14175	6.26931	-0.532097	0.298946	0	-0.415929	0.637406	0	0	1809	ethanolamine utilization cob(I)yrinic acid a,c-diamide adenosyltransferase EutT
C_RS19130	20.5604	-0.710738	0.429228	0	-0.270428	0.707612	0	0	1810	amino acid ABC transporter substrate-binding protein
C_RS10650	3.46535	-0.296302	0.073665	0	-1.21115	0.999993	1	0.1	1811	YebY family protein
C_RS17270	22.1842	-0.50105	0.156605	0	-0.47385	0.473708	0	0	1812	MFS transporter
C_RS09950	6.17426	-0.427489	0.304828	0	-0.381679	1.25516	1	0.1	1813	anti-FlhDC factor
C_RS21350	6.23762	-0.39855	0.137394	0	-0.884058	0.181667	0	0	1814	hypothetical protein
C_RS03335	0.477228	-0.265029	0.170897	0	-0.364562	2.4235	3	0.3	1815	lipoyl synthase
C_RS19600	6.1802	-0.48319	0.240355	0	-0.506	0.995795	0	0	1816	peptidylprolyl isomerase A
C_RS14330	12.3307	-0.563654	0.179523	0	-0.369089	0.624625	0	0	1817.5	phosphoribosylformylglycinamidine cyclo-ligase
C_RS01275	7.71485	-0.458347	0.18309	0	-0.57174	0.317426	0	0	1817.5	type IV toxin-antitoxin system YeeU family antitoxin
C_RS15935	4.29703	-0.417722	0.236799	0	-0.721755	1.15852	0	0	1819	YqcC family protein
C_RS16440	22.8475	-0.616267	0.27039	0	-0.322755	0.359476	0	0	1820	guanine deaminase
C_RS18965	23.7168	-0.660307	0.392956	0	-0.28888	0.442288	0	0	1821.5	ribonuclease G
C_RS06455	8.14059	-0.540648	0.333567	0	-0.399632	0.891254	0	0	1821.5	penicillin-binding protein activator LpoB
C_RS18170	10.8139	-0.485522	0.467284	1	-0.142959	1.34467	1	0.2	1823	NADPH-dependent ferric chelate reductase
C_RS20220	10.7545	-0.611587	0.412151	0	-0.325702	0.742528	0	0	1824.5	nickel import ATP-binding protein NikE
C_RS02290	8.22376	-0.549389	0.196106	0	-0.386939	0.557096	0	0	1824.5	shikimate kinase AroL
C_RS15205	0.425743	-0.0137918	0.00970001	0	-0.905408	1.72437	2	0.2	1826	LexA family transcriptional regulator
C_RS12280	21.8594	-0.813009	0.158715	0	-0.227378	0.224636	0	0	1827	polysaccharide export protein Wza
C_RS00840	8.53465	-0.488418	0.391611	0	-0.493672	0.777124	0	0	1828	RNA 2',3'-cyclic phosphodiesterase
C_RS25170	20.0218	-0.652234	0.36397	0	-0.293262	0.420269	0	0	1829	UDP-N-acetylmuramate:L-alanyl-gamma-D-glutamyl- meso-diaminopimelate ligase
C_RS03020	14.6158	-0.475441	0.257886	0	-0.522048	0.464217	0	0	1830	DUF4434 family protein
C_RS28775	5.54257	-0.474364	0.263423	0	-0.299784	1.25149	1	0.1	1831.5	fructose-bisphosphatase class II
C_RS15495	12.8257	-0.4107	0.295371	0	-0.412834	1.25504	1	0.1	1831.5	PTS glucitol/sorbitol transporter subunit IIB
C_RS11055	12.2772	-0.595152	0.303268	0	-0.339147	0.803228	0	0	1833.5	D-cysteine desulfhydrase
C_RS04300	14.8475	-0.507468	0.174678	0	-0.455809	0.546104	0	0	1833.5	fructose-6-phosphate aldolase
C_RS19080	10.9802	-0.446645	0.246792	0	-0.596696	1.08053	0	0	1835	tRNA dihydrouridine synthase DusB
C_RS09705	21.5228	-0.706914	0.371031	0	-0.265416	0.709093	0	0	1836	Bcr/CflA family multidrug efflux MFS transporter
C_RS18490	12.9663	-0.562925	0.296723	0	-0.364655	0.709369	0	0	1837	PTS N-acetylgalactosamine transporter subunit IIC
C_RS16570	2.92079	-0.283681	0.034362	0	-1.37857	1.00807	1	0.1	1838	Xaa-Pro aminopeptidase
C_RS07250	10.3644	-0.686668	0.391688	0	-0.27425	0.66007	0	0	1839.5	Replication protein 14
C_RS20755	21.6277	-0.520119	0.228271	0	-0.427671	0.454954	0	0	1839.5	valine--pyruvate transaminase
C_RS09435	21.6792	-0.724336	0.317478	0	-0.258499	0.568009	0	0	1842	two-component system sensor histidine kinase RstB
C_RS23845	22.6653	-0.49759	0.206075	0	-0.472244	0.305957	0	0	1842	dihydrolipoyl dehydrogenase
C_RS16105	13.5505	-0.445252	0.192868	0	-0.600223	0.694811	0	0	1842	hypothetical protein
C_RS01730	23.6851	-0.695672	0.288451	0	-0.269177	0.280975	0	0	1844	flagellar biosynthesis protein FlhA
C_RS09970	22.1228	-0.684013	0.281768	0	0.27421	0.316451	0	0	1845	vitamin B12 ABC transporter permease BtuC
C_RS25545	15.9426	-0.756706	0.416954	0	-0.243116	0.607333	0	0	1847	beta-aspartyl-peptidase
C_RS23015	15.6099	-0.46847	0.205765	0	-0.529551	0.691939	0	0	1847	CDP-diacylglycerol diphosphatase
C_RS12365	4.41782	-0.398124	0.248329	0	-0.85761	0.854215	0	0	1847	YegP family protein
C_RS15625	6.11287	-0.390288	0.230453	0	-0.927049	0.737051	0	0	1849	hydrogenase nickel incorporation protein HypB
C_RS09035	32.4158	-0.956642	0.370555	1	0.0595074	0.380787	0	0.1	1850	ABC transporter ATP-binding protein/permease
C_RS19000	13.4396	-0.535519	0.356689	0	-0.399226	0.736713	0	0	1851	oxidoreductase
C_RS21170	12.8317	-0.456157	0.258499	0	-0.562846	0.60317	0	0	1852	PTS fructose transporter subunit IIC
C_RS08655	13.6238	-0.517987	0.371054	0	-0.430852	0.628669	0	0	1853	cytochrome b561
C_RS16355	47.3861	-0.755156	0.895745	1	-0.100695	0.638152	0	0.1	1854	xanthine dehydrogenase molybdenum-binding subunit XdhA
C_RS19895	14.5822	-0.492757	0.172594	0	-0.475694	0.567374	0	0	1855	glycerol-3-phosphate dehydrogenase
C_RS07575	1.54851	-0.334723	0.207732	0	-0.403319	2.77963	2	0.2	1856	hypothetical protein
C_RS21595	11.9624	-0.426589	0.209891	0	-0.654479	0.277237	0	0	1857.5	DMT family transporter
C_RS08100	9.20792	-0.403098	0.129983	0	-0.783605	0.26149	0	0	1857.5	threonylcarbamoyl-AMP synthase
C_RS23540	5.9604	-0.429546	0.189544	0	-0.644202	1.45654	0	0	1859	acetyltransferase
C_RS04925	19.0535	-0.63056	0.441305	1	-0.153752	0.442812	0	0.1	1860	DUF421 domain-containing protein
C_RS00055	8.25149	-0.438121	0.241931	0	-0.613607	0.423912	0	0	1861	molybdopterin adenylyltransferase
C_RS19640	26.701	-0.768182	0.444391	1	-0.0935755	0.724931	0	0.1	1862	YhfT family protein
C_RS16985	2.57228	-0.318262	0.127427	0	-0.878206	1.14636	1	0.1	1863	IS66 family transposase
C_RS05305	24.0495	-0.717796	0.357665	0	-0.254628	0.278595	0	0	1864.5	4Fe-4S binding protein
C_RS25825	15.2851	-0.696153	0.352917	0	-0.263152	0.430532	0	0	1864.5	thymidine phosphorylase
C_RS16625	8.31485	-0.458543	0.211062	0	-0.546027	0.993897	0	0	1866	arginine exporter ArgO
C_RS05685	5.16832	-0.381311	0.103189	0	-0.997012	0.409963	0	0	1867	hypothetical protein
C_RS19465	60.5703	-0.96813	0.245745	1	-0.0546529	0.303107	0	0.1	1868	bifunctional chitinase/lysozyme
C_RS12535	0.293069	-0.172026	0.350922	0	-0.760072	1.60788	2	0.2	1869	methionine--tRNA ligase
C_RS15970	13.5386	-0.541216	0.18656	0	-0.383614	0.439502	0	0	1870	flap endonuclease Xni
C_RS00420	29.8277	-0.81728	0.336824	0	-0.21707	0.215893	0	0	1871	2-isopropylmalate synthase
C_RS18195	11.3485	-0.314553	0.0533213	0	-0.902083	0.697338	1	0.1	1872	transcriptional regulator EbgR
C_RS29340	5.00792	-0.425743	0.209856	0	-0.651174	0.62943	0	0	1873	type I toxin-antitoxin system Ibs family toxin
C_RS09045	24.703	-0.545919	0.238666	0	-0.376848	0.261957	0	0	1874	sulfatase-like hydrolase/transferase
C_RS20770	18.9089	-0.632707	0.440804	0	-0.294495	0.64846	0	0	1875	IclR family transcriptional regulator YiaJ
C_RS01895	18.5129	-0.557549	0.188084	0	-0.362718	0.228362	0	0	1876	LysR family transcriptional regulator
C_RS02365	35.9703	-0.96075	0.39839	1	-0.0533452	0.331465	0	0.1	1877	maltodextrin glucosidase
C_RS24585	28.5564	-0.655192	0.265639	0	-0.27967	0.440437	0	0	1878	two-component system response regulator PgtA
C_RS03645	24.9861	-1.01669	0.315847	1	-0.0472784	0.285397	0	0.1	1879	alpha-D-glucose phosphate-specific phosphoglucomutase
C_RS21915	10.1168	-0.380206	0.033458	0	-0.98907	0.610751	0	0	1880	transcriptional antiterminator BglG
C_RS05670	1.23168	-0.306536	0.0529149	0	-0.956532	1.20485	1	0.1	1881	hypothetical protein
C_RS16225	10.9703	-0.509085	0.353562	0	-0.435024	0.581129	0	0	1882	prepilin peptidase-dependent protein
C_RS26700	1.88515	-0.316627	0.184773	0	-0.868536	0.935604	1	0.1	1883	tail fiber assembly protein
C_RS20440	15.9208	-0.418146	0.158437	0	-0.670847	0.450709	0	0	1884	acid resistance transcriptional activator GadW
C_RS02330	24.5228	-0.509581	0.27654	0	-0.43022	0.434534	0	0	1885	MFS transporter AraJ
C_RS08420	12.9644	-0.573885	0.322128	0	-0.343812	1.14961	0	0	1886.5	L-Ala-D/L-Glu epimerase
C_RS00865	13.497	-0.438366	0.244634	0	-0.596191	0.640201	0	0	1886.5	Fe(3+)-hydroxamate ABC transporter substrate-binding protein FhuD
C_RS05830	61.9604	-1.17674	0.269994	1	-0.0327181	0.202673	0	0.1	1888	S/F1C fimbrial usher SfaF/FocD
C_RS07530	2.11683	-0.293161	0.100617	0	-1.09931	2.17837	1	0.1	1889	biofilm/acid-resistance regulator AriR
C_RS25110	11.2931	-0.550014	0.13434	0	-0.365227	0.576729	0	0	1890	peptide-methionine (S)-S-oxide reductase MsrA
C_RS14205	26.6317	-0.536776	0.23793	0	-0.381279	0.404316	0	0	1891.5	transketolase
C_RS15385	18.9683	-0.536349	0.278487	0	-0.381652	0.649728	0	0	1891.5	multidrug efflux MFS transporter periplasmic adaptor subunit EmrA
C_RS02260	4.08317	-0.361484	0.13686	0	-0.32034	1.68598	2	0.2	1893	anti-adapter protein IraP
C_RS12420	2.07921	-0.309979	0.0837513	0	-0.906668	0.771821	1	0.1	1894	PTS galactitol transporter subunit IIB
C_RS29100	15.2158	-0.490427	0.19055	0	-0.46105	0.25063	0	0	1895	galactarate dehydratase
C_RS16545	27.5861	-0.452837	0.240877	0	-0.544946	0.535955	0	0	1896	aminomethyl-transferring glycine dehydrogenase
C_RS24230	7.40396	-0.39864	0.116591	0	-0.779465	0.581507	0	0	1897	DNA-binding transcriptional activator AdiY
C_RS00880	25.1089	-0.597304	0.46317	1	-0.167015	0.465286	0	0.1	1898	H(+)/Cl(-) exchange transporter ClcA
C_RS14315	0.934653	-0.293808	0.269645	0	-1.06147	2.05349	1	0.1	1899	DnaA inactivator Hda
C_RS12765	36.602	-0.393329	0.226321	0	0.836754	0.27667	0	0	1900	lysine-specific permease
C_RS06430	12.802	-0.48644	0.287983	0	-0.466826	0.387255	0	0	1901	metal-dependent hydrolase
C_RS19845	19.8	-0.727116	0.364437	0	-0.2421	0.370441	0	0	1902.5	gluconate transporter
C_RS12320	29.8	-0.60447	0.356047	0	-0.310328	0.274179	0	0	1902.5	protein kinase YegI
C_RS10385	14.1861	-0.634899	0.380658	0	-0.283856	0.390859	0	0	1904	DNA-binding transcriptional regulator NimR
C_RS12300	15.2475	-0.657979	0.376416	0	-0.273266	0.95016	0	0	1905	uridine kinase
C_RS19440	28.6931	-0.664538	0.739777	1	0.127093	0.685716	0	0.1	1906	type II secretion system protein GspL
C_RS23155	18.1663	-0.542061	0.348136	0	-0.370082	0.525656	0	0	1907	methylenetetrahydrofolate reductase
C_RS26580	3.68911	-0.323635	0.0482347	0	-0.766517	1.33623	1	0.1	1908	microcin McmA
C_RS25025	21.4238	-0.54809	0.375813	0	-0.363006	0.671446	0	0	1909.5	acyl CoA:acetate/3-ketoacid CoA transferase
C_RS08115	10.5109	-0.466905	0.141287	0	-0.499765	0.64203	0	0	1909.5	cob(I)yrinic acid a,c-diamide adenosyltransferase
C_RS11285	30.101	-0.950107	0.67773	1	-0.0486124	0.519965	0	0.1	1911.5	porin
C_RS13900	18.697	-0.573238	0.470468	1	0.182161	0.465445	0	0.1	1911.5	nucleoside permease NupC
C_RS25175	6.03366	-0.49134	0.281262	0	0.455933	0.516806	0	0	1913	ribosome-associated protein
C_RS19110	65.6079	-0.906336	0.424756	1	0.0548505	0.305883	0	0.1	1914	multidrug efflux RND transporter permease subunit AcrF
C_RS23130	8.32475	-0.429901	0.176671	0	-0.613535	0.665026	0	0	1915	nucleoside-specific channel-forming protein Tsx
C_RS09625	33.6238	-0.853496	0.269624	0	-0.1995	0.235637	0	0	1916	FUSC family protein
C_RS12610	5.98812	-0.415183	0.105104	0	-0.671936	0.994258	0	0	1917	glycine betaine ABC transporter permease YehW
C_RS15090	6.12871	-0.501243	0.218072	0	-0.248655	1.74616	1	0.1	1918	terminase small subunit
C_RS25195	34.905	-0.68302	0.247081	0	-0.259372	0.337047	0	0	1919	anaerobic ribonucleoside-triphosphate reductase
C_RS08680	25.701	-0.834104	0.621706	1	-0.0686389	0.550984	0	0.1	1920	glucan biosynthesis protein OpgD
C_RS01695	16.0574	-0.770208	0.453993	1	-0.0843965	0.362852	0	0.1	1921	2-oxoglutaramate amidase
C_RS11995	4.20792	-0.436634	0.12181	0	0.336681	1.45806	1	0.1	1922	RadC family protein
C_RS07255	8.56238	-0.533007	0.381552	0	-0.379613	0.250855	0	0	1923	protein ren
C_RS24515	2.33267	-0.289414	0.111781	0	-1.09984	2.36258	1	0.1	1924	P fimbrial minor subunit PapH
C_RS24170	7.14257	-0.461463	0.156001	0	-0.509538	0.924824	0	0	1925	phosphonate ABC transporter substrate-binding protein
C_RS01470	6.94455	-0.417947	0.0912276	0	0.652737	0.734318	0	0	1926	oligogalacturonate lyase
C_RS02100	11.3901	-0.464832	0.221652	0	-0.498749	0.516453	0	0	1927	methylisocitrate lyase
C_RS07870	61.6574	-0.937559	0.260255	1	0.0481195	0.296849	0	0.1	1928	nitrate reductase subunit alpha
C_RS22475	7.5901	-0.363004	0.261898	0	-0.537885	1.07061	1	0.1	1929	SIS domain-containing protein
C_RS02325	13.3723	-0.617435	0.262164	0	-0.293157	0.686604	0	0	1930.5	fructokinase
C_RS14715	16.3762	-0.597252	0.155251	0	-0.312223	0.25541	0	0	1930.5	tRNA(1)(Val) (adenine(37)-N(6))-methyltransferase TrmN
C_RS25270	10.8317	-0.548339	0.234271	0	-0.358101	0.411168	0	0	1932	YhcH/YjgK/YiaL family protein
C_RS05210	18.3307	-0.556765	0.331415	0	-0.349015	0.509482	0	0	1934	23S rRNA (cytosine(1962)-C(5))-methyltransferaseRlmI
C_RS09645	8.90891	-0.498509	0.287825	0	-0.438093	0.666083	0	0	1934	DNA-binding transcriptional regulator NemR
C_RS06855	8.00396	-0.462838	0.240496	0	-0.498847	0.662102	0	0	1934	phage minor tail protein L
C_RS20180	8.61584	-0.466161	0.0397426	0	0.493018	0.270225	0	0	1936	phage sensitivity protein DcrB
C_RS17450	5.34653	-0.394013	0.23299	0	-0.788075	0.697292	0	0	1937.5	DUF957 domain-containing protein
C_RS03080	4.3901	-0.382387	0.167133	0	-0.897182	0.809392	0	0	1937.5	MmcQ/YjbR family DNA-binding protein
C_RS11980	8.63168	-0.371189	0.0842004	0	1.0186	0.630089	0	0	1939	hypothetical protein
C_RS14420	4.26535	-0.432608	0.209517	0	-0.589835	0.889785	0	0	1940	ancillary SecYEG translocon subunit YfgM
C_RS05700	9.80198	-0.494209	0.565796	1	0.253121	0.976481	0	0.1	1941	3'-5' exonuclease
C_RS22110	9.31287	-0.629279	0.290256	0	0.280428	0.85271	0	0	1942	HTH-type transcriptional regulator HdfR
C_RS20780	5.38812	-0.31703	0.0892732	0	-0.793216	0.836388	1	0.1	1943	YhcH/YjgK/YiaL family protein
C_RS03910	16.9168	-0.634887	0.330788	0	-0.276924	0.434138	0	0	1944	nicotinamide riboside transporter PnuC
C_RS10340	19.703	-0.660239	0.176488	0	-0.262335	0.309087	0	0	1945	methylglyoxal reductase YeaE
C_RS21340	4.32673	-0.347562	0.172378	0	-0.18417	2.01708	3	0.3	1946	ShlB/FhaC/HecB family hemolysin secretion/activation protein
C_RS07900	12.5644	-0.548795	0.431223	0	-0.35205	0.728177	0	0	1947	MBL fold metallo-hydrolase
C_RS22240	16.596	-0.447215	0.242023	0	-0.535463	0.735751	0	0	1948	dTDP-4-amino-4,6-dideoxygalactose transaminase
C_RS01030	43.8099	-0.8826	0.413849	1	-0.0511204	0.35438	0	0.1	1949	lysine decarboxylase LdcC
C_RS02765	5.53861	-0.410473	0.126398	0	-0.663843	1.22286	0	0	1950	Cys-tRNA(Pro)/Cys-tRNA(Cys) deacylase YbaK
C_RS10790	9.5802	-0.468388	0.188177	0	0.478539	0.714538	0	0	1951.5	YebC/PmpR family DNA-binding transcriptional regulator
C_RS11425	5.85941	-0.409712	0.231302	0	-0.664705	0.931131	0	0	1951.5	H-NS histone family protein
C_RS15975	23.6594	-0.602664	0.659814	1	-0.152045	0.589754	0	0.1	1953	lactaldehyde reductase
C_RS25595	10.402	-0.421742	0.293586	0	-0.622084	0.509246	0	0	1954	DUF445 domain-containing protein
C_RS09830	1.47129	-0.277299	0.151183	0	-1.18893	2.30046	1	0.1	1955	YdiH family protein
C_RS25205	7.5901	-0.623393	0.508624	1	-0.138488	0.624698	0	0.1	1956	alpha,alpha-phosphotrehalase
C_RS05945	22.1921	-0.447865	0.190049	0	-0.530154	0.403838	0	0	1957	GTP-binding protein
C_RS10420	3.81782	-0.387433	0.181616	0	-0.827582	0.615391	0	0	1958	DUF1869 domain-containing protein
C_RS08990	5.10297	-0.364498	0.314765	0	-0.507658	1.66936	1	0.1	1959	peroxiredoxin OsmC
C_RS21370	11.2515	-0.514388	0.355822	0	-0.398362	0.768369	0	0	1960.5	ethanolamine utilization protein EutJ
C_RS00300	14.5228	-0.505425	0.310637	0	-0.413058	0.718012	0	0	1960.5	4-hydroxythreonine-4-phosphate dehydrogenase PdxA
C_RS19840	3.14455	-0.45221	0.356729	0	0.514301	0.798074	0	0	1962	Fe-S biogenesis protein NfuA
C_RS09915	25.8733	-0.451147	0.283503	0	0.518544	0.369364	0	0	1963	medium-chain fatty-acid--CoA ligase
C_RS10255	6.74653	-0.530513	0.209874	0	-0.206524	1.51023	1	0.1	1964	NAD(P)H nitroreductase
C_RS23140	13.4871	-0.464444	0.151325	0	-0.481829	0.596061	0	0	1965	bifunctional metallophosphatase/5'-nucleotidase
C_RS09900	14.4653	-0.633571	0.522107	1	0.129601	0.286573	0	0.1	1966	electron transfer flavoprotein subunit alpha
C_RS13850	41.5248	-0.700434	0.487795	1	0.0983558	0.431634	0	0.1	1967	phosphoenolpyruvate--protein phosphotransferase
C_RS05985	34.495	-0.610152	0.491829	1	-0.143496	0.39246	0	0.1	1968	autotransporter adhesin Ag43
C_RS10835	14.9723	-0.564662	0.270166	0	-0.328516	0.90691	0	0	1969	NapC/NirT family cytochrome c
C_RS06350	2.09109	-0.288078	0.0826616	0	-1.03029	1.02461	1	0.1	1970	ribonuclease E
C_RS00590	32.3822	-0.76919	0.473143	1	0.0750714	0.487239	0	0.1	1971	type II secretion system protein GspE
C_RS10290	26.4376	-1.00122	0.484253	1	-0.0299929	0.8162	0	0.1	1972	NADH-dependent methylglyoxal reductase
C_RS21795	0.461386	-0.177227	0.197447	0	-0.676572	2.01187	2	0.2	1973	DNA topoisomerase (ATP-hydrolyzing) subunit B
C_RS10185	12.7168	-0.566761	0.257076	0	-0.326077	0.391091	0	0	1974	ABC transporter substrate-binding protein
C_RS21155	13.2337	-0.438493	0.20352	0	-0.551302	0.336224	0	0	1975	ROK family protein
C_RS14765	41.4416	-0.865691	0.523879	1	-0.0497943	0.339359	0	0.1	1976.5	protein lysine acetyltransferase
C_RS01760	20.4495	-0.594142	0.623984	1	-0.154178	0.60657	0	0.1	1976.5	cytosol nonspecific dipeptidase
C_RS13665	7.54653	-0.441377	0.296367	0	-0.311804	1.41487	1	0.1	1978	fimbrial protein
C_RS16205	53.4535	-0.599839	0.390596	0	-0.294612	0.379613	0	0	1979.5	pitrilysin
C_RS18495	18.3683	-0.473752	0.313295	0	-0.462709	0.560971	0	0	1979.5	PTS N-acetylgalactosamine transporter subunit IID
C_RS11385	8.07723	-0.524386	0.351611	0	-0.374795	0.554696	0	0	1981	lipoprotein
C_RS04090	5.69703	-0.374407	0.237918	0	-0.470775	1.26978	1	0.1	1982	cyclic pyranopterin monophosphate synthase MoaC
C_RS20640	9.74653	-0.427745	0.144304	0	-0.586288	0.544686	0	0	1983	DNA-3-methyladenine glycosylase I
C_RS08055	17.0554	-0.867805	0.382383	1	-0.0487527	0.791273	0	0.1	1984	outer membrane protein OmpW
C_RS24570	30.8851	-0.654986	0.319026	0	-0.258103	0.249487	0	0	1985	phosphoglycerate transporter PgtP
C_RS14320	26.0693	-0.620139	0.248104	0	-0.279051	0.186049	0	0	1986	uracil permease
C_RS05435	18.5287	-0.530018	0.441563	1	-0.203229	0.773674	0	0.1	1987	iron uptake system protein EfeO
C_RS09530	4.05941	-0.497387	0.275844	0	0.419095	0.647057	0	0	1988	electron transport complex subunit RsxA
C_RS04580	2.14059	-0.364721	0.0934585	0	-0.498189	1.91888	1	0.1	1989	tail assembly chaperone
C_RS06365	12.2238	-0.70322	0.327199	0	-0.234253	0.579222	0	0	1990	7-methyl-GTP pyrophosphatase
C_RS25820	9.79802	-0.489777	0.286364	0	-0.434598	0.600591	0	0	1991	deoxyribose-phosphate aldolase
C_RS13650	29.3584	-0.842131	0.53354	1	-0.0530832	0.470864	0	0.1	1992	DUF2544 domain-containing protein
C_RS23605	8.1604	-0.404379	0.182062	0	-0.671545	0.812698	0	0	1993	PTS system mannose/fructose/sorbose family transporter subunit IID
C_RS09560	11.8475	-0.441598	0.190887	0	-0.534371	0.326173	0	0	1994	endonuclease III
C_RS04510	4.56436	-0.469101	0.209615	0	-0.26673	1.55022	1	0.1	1995	terminase endonuclease subunit
C_RS12415	13.8337	-0.406477	0.227537	0	0.658097	0.445081	0	0	1996	PTS galactitol transporter subunit IIC
C_RS13340	6.59604	-0.444046	0.222791	0	-0.301275	1.52014	1	0.1	1997.5	GNAT family N-acetyltransferase
C_RS12995	6.71881	-0.424918	0.180455	0	-0.335088	1.58807	1	0.1	1997.5	heme exporter protein CcmB
C_RS23230	38.6693	-0.704594	0.3174	0	-0.230825	0.309514	0	0	1999.5	phosphoenolpyruvate carboxylase
[truncated: 2,910 more rows]

## Sheet: Combined Spleens
Locus_tag	Inf_sites	MWU_P-value	Log2FC	gene
C_RS01765	5.65347	0.00964155	-9.70423	xanthine phosphoribosyltransferase
C_RS20350	4.87129	0.0198684	-9.25444	helix-turn-helix transcriptional regulator
C_RS19795	5.82178	0.0290151	-9.24716	two-component system response regulator OmpR
C_RS12925	7.80198	0.0111178	-9.11557	cardiolipin transport protein PbgA
C_RS06295	4.25743	0.0288796	-9.04549	flagellar basal body rod protein FlgB
C_RS13700	2.82178	0.0795845	-8.8985	YfcZ/YiiS family protein
C_RS13810	2.75248	0.0872751	-8.83702	lipoprotein
C_RS12170	4.15842	0.0349824	-8.76036	O6 family O-antigen polymerase
C_RS29455	2	0.406544	-8.68331	transposase domain-containing protein
C_RS12610	4.27723	0.0898414	-8.47889	glycine betaine ABC transporter permease YehW
C_RS15580	3.78218	0.122829	-8.41977	formate hydrogenlyase subunit HycG
C_RS15550	3.30693	0.15443	-8.39527	hypothetical protein
C_RS08335	3.74257	0.07883	-8.38498	thiosulfate sulfurtransferase PspE
C_RS10020	2.26733	0.127016	-8.37235	hypothetical protein
C_RS20765	3.40594	0.149619	-8.36853	4Fe-4S binding protein
C_RS19900	3.0198	0.0733008	-8.36007	hypothetical protein
C_RS24900	2.91089	0.0800154	-8.30045	DUF350 domain-containing protein
C_RS19550	2.53465	0.0985983	-8.28768	YheU family protein
C_RS14775	2.58416	0.0967211	-8.26525	YfiM family lipoprotein
C_RS08065	2.53465	0.102422	-8.23871	ferritin-like domain-containing protein
C_RS06890	3.51485	0.129232	-8.23792	hypothetical protein
C_RS04690	3.38614	0.163042	-8.21485	YbjO family protein
C_RS29160	2.07921	0.135202	-8.19275	DUF1364 domain-containing protein
C_RS11780	2.54455	0.0977022	-8.12069	PIG-L family deacetylase
C_RS18910	2.73267	0.200896	-8.11775	outer membrane-stress sensor serine endopeptidase DegS
C_RS28525	2.41584	0.290921	-8.1107	Putrescine importer PuuP
C_RS12245	2.42574	0.107582	-8.09607	colanic acid biosynthesis glycosyltransferase WcaE
C_RS09300	2.56436	0.0930352	-8.09594	DUF1283 family protein
C_RS08735	1.52475	0.242872	-8.09082	DUF2554 family protein
C_RS11385	6.08911	0.020131	-7.93769	lipoprotein
C_RS04445	1.89109	0.161809	-7.91554	DUF2732 family protein
C_RS26455	1.59406	0.253092	-7.90985	cold-shock protein
C_RS17260	3.43564	0.182345	-7.90942	N-acetylneuraminic acid channel protein
C_RS16165	2.49505	0.316606	-7.88255	SIS domain-containing protein
C_RS29385	2.0099	0.150136	-7.8523	hypothetical protein
C_RS06940	1.92079	0.141595	-7.83997	AlpA family transcriptional regulator
C_RS07800	2.18812	0.126847	-7.81603	peptide chain release factor N(5)-glutamine methyltransferase
C_RS09640	2.74257	0.209878	-7.79748	DUF1289 domain-containing protein
C_RS29675	1.67327	0.200935	-7.76674	hypothetical protein
C_RS19690	2.0297	0.137256	-7.70253	adenine-specific DNA-methyltransferase
C_RS27390	1.60396	0.2196	-7.68931	hypothetical protein
C_RS23455	0.891089	0.966771	-7.68923	uroporphyrinogen decarboxylase
C_RS25580	2.0198	0.142459	-7.68921	DUF3343 domain-containing protein
C_RS12385	3.12871	0.220696	-7.68024	PcfJ domain-containing protein
C_RS04440	1.75248	0.175741	-7.66963	DUF5347 domain-containing protein
C_RS05780	1.87129	0.145362	-7.66922	CPBP family intramembrane metalloprotease
C_RS14160	1.61386	0.201433	-7.66253	ethanolamine utilization microcompartment protein EutN
C_RS07760	1.28713	0.336973	-7.64885	aminoacyl-tRNA hydrolase
C_RS15380	1.57426	0.204859	-7.60773	multidrug efflux transporter EmrAB transcriptional repressor EmrR
C_RS04625	2.34653	0.256503	-7.60075	ogr/Delta-like zinc finger family protein
C_RS06395	0.871287	0.966771	-7.6004	3-oxoacyl-ACP reductase FabG
C_RS25700	1.29703	0.343485	-7.60026	DNA replication protein DnaC
C_RS02090	1.70297	0.179557	-7.54317	DUF1471 domain-containing protein
C_RS15080	1.57426	0.19668	-7.50621	gpW family protein
C_RS08210	2.55446	0.274259	-7.457	osmotically-inducible lipoprotein OsmB
C_RS16980	1.63366	0.161674	-7.39742	IS66 family insertion sequence element accessoryprotein TnpB
C_RS23815	5.27723	0.241271	-7.39519	alanine racemase
C_RS13365	1.53465	0.614556	-7.39172	NADH-quinone oxidoreductase subunit NuoN
C_RS29505	1.38614	0.219405	-7.38042	hypothetical protein
C_RS20670	1.67327	0.46541	-7.37506	HTH-type transcriptional regulator
C_RS10485	1.09901	0.441056	-7.34745	YoaH family protein
C_RS09215	1.44554	0.205782	-7.32177	PTS sugar transporter subunit IIB
C_RS28535	1.45545	0.209123	-7.29616	multidrug efflux MFS transporter
C_RS04955	1.49505	0.1938	-7.28722	integration host factor subunit beta
C_RS26220	1.9703	0.392787	-7.27614	transposase
C_RS26575	1.22772	0.272953	-7.26097	microcin H47
C_RS26855	1.21782	0.297004	-7.25234	Hok/Gef family protein
C_RS05300	1.14851	0.331767	-7.22522	addiction module toxin, GnsA/GnsB family
C_RS26540	1.73267	0.446118	-7.20767	DUF4158 domain-containing protein
C_RS12795	2.20792	0.366287	-7.1944	transcriptional regulator YeiL
C_RS13405	1.41584	0.198058	-7.18812	NADH-quinone oxidoreductase subunit NuoF
C_RS27910	1.38614	0.573934	-7.15956	type VI secretion system tube protein Hcp
C_RS06980	1.34653	0.222462	-7.15951	DUF4222 domain-containing protein
C_RS16700	1.57426	0.48275	-7.15531	PTS mannitol transporter subunit IIA
C_RS10965	1.15842	0.291806	-7.14036	DUF2766 domain-containing protein
C_RS29305	2.61386	0.263355	-7.13734	IS21 family transposase
C_RS21035	0.752475	0.966771	-7.0708	lipid IV(A) 3-deoxy-D-manno-octulosonic acid transferase
C_RS07750	1.18812	0.288481	-7.05031	hypothetical protein
C_RS06220	1.22772	0.240168	-7.04024	DUF2770 family protein
C_RS10410	1.22772	0.194993	-7.01949	YoaK family small membrane protein
C_RS09775	6.18812	0.120631	-7.00124	ferredoxin-like protein
C_RS03380	1.11881	0.285662	-6.99812	23S rRNA (pseudouridine(1915)-N(3))-methyltransferase RlmH
C_RS29375	0.940594	0.372337	-6.99802	rpoE leader peptide RseD
C_RS13420	1.24752	0.214413	-6.98732	NADH-quinone oxidoreductase subunit NuoB
C_RS11215	6.70297	0.0894377	-6.9802	flagellar type III secretion system protein FliR
C_RS16470	1.21782	0.22559	-6.97627	hypothetical protein
C_RS07840	1.07921	0.259582	-6.96557	DsrE/F sulfur relay family protein YchN
C_RS05595	3.31683	0.256661	-6.96491	outer membrane lipoprotein carrier protein LolA
C_RS10375	1.63366	0.457933	-6.96425	hypothetical protein
C_RS20890	1.49505	0.49337	-6.89187	DUF3251 domain-containing protein
C_RS21805	0.970297	0.936496	-6.88677	DNA polymerase III subunit beta
C_RS25765	0.980198	0.966771	-6.88284	DNA polymerase III subunit psi
C_RS12395	1.13861	0.278556	-6.86393	hypothetical protein
C_RS14405	0.960396	0.390657	-6.83961	zinc ribbon domain-containing protein
C_RS11245	1.05941	0.25482	-6.81602	DUF2158 domain-containing protein
C_RS04605	1	0.317642	-6.8037	GpE family phage tail protein
C_RS02980	0.881188	0.500604	-6.79128	bifunctional methylenetetrahydrofolate dehydrogenase/methenyltetrahydrofolate cyclohydrolase FolD
C_RS11435	0.930693	0.325416	-6.76672	hypothetical protein
C_RS29230	1.0396	0.272386	-6.75424	hypothetical protein
C_RS17750	1.51485	0.493146	-6.74798	TonB system transport protein ExbD
C_RS19120	2.25743	0.3086	-6.71847	membrane protein
C_RS01675	1.57426	0.503135	-6.71801	helix-turn-helix transcriptional regulator
C_RS12150	1.08911	0.24446	-6.71541	UDP-glucose 4-epimerase GalE
C_RS07280	1.80198	0.575544	-6.71291	NinE family protein
C_RS18740	12.6337	0.00123138	-6.70809	outer membrane lipid asymmetry maintenance protein MlaD
C_RS20975	0.752475	0.550765	-6.70199	ADP-glyceromanno-heptose 6-epimerase
C_RS13185	1.52475	0.480726	-6.69305	ferredoxin-like diferric-tyrosyl radical cofactor maintenance protein YfaE
C_RS03050	1	0.266781	-6.68914	Cu(+)/Ag(+) efflux RND transporter periplasmic metallochaperone CusF
C_RS04580	1.51485	0.514611	-6.68694	tail assembly chaperone
C_RS01970	1.40594	0.540008	-6.6635	membrane protein
C_RS21025	1.0495	0.243715	-6.66246	glycosyltransferase family 4 protein
C_RS05760	5.19802	0.209292	-6.65786	toxin-activating lysine-acyltransferase
C_RS00395	1.72277	0.417275	-6.65551	glucose uptake inhibitor SgrT
C_RS14315	0.732673	0.568492	-6.64916	DnaA inactivator Hda
C_RS29555	0.792079	0.477142	-6.64899	hypothetical protein
C_RS04190	3.0198	0.321377	-6.64131	C4-type zinc finger protein YbiI
C_RS13400	1.84158	0.458507	-6.63711	NADH-quinone oxidoreductase subunit NuoG
C_RS29815	0.930693	0.301222	-6.63525	LysR family transcriptional regulator
C_RS13385	0.960396	0.268699	-6.5936	NADH-quinone oxidoreductase subunit J
C_RS21070	0.633663	0.966771	-6.59357	dUTP diphosphatase
C_RS29220	0.881188	0.356678	-6.57944	hypothetical protein
C_RS15150	1.34653	0.522501	-6.57675	cold shock-like protein CspF
C_RS14090	3.0396	0.346537	-6.57296	DUF2919 domain-containing protein
C_RS06600	0.653465	0.966771	-6.53531	hypothetical protein
C_RS06425	0.821782	0.392455	-6.53509	DNA polymerase III subunit delta'
C_RS14415	0.930693	0.260258	-6.5213	outer membrane protein assembly factor BamB
C_RS26205	0.950495	0.272585	-6.52113	transcriptional regulator
C_RS04420	1.47525	0.507201	-6.51852	hypothetical protein
C_RS24715	0.752475	0.886308	-6.51755	elongation factor P
C_RS18775	0.742574	0.47815	-6.49088	lipopolysaccharide ABC transporter substrate-binding protein LptA
C_RS19175	2.46535	0.252904	-6.47261	DUF1488 domain-containing protein
C_RS15585	3.81188	0.299442	-6.43482	formate hydrogenlyase subunit HycF
C_RS16525	0.871287	0.66518	-6.43264	tRNA-modifying protein YgfZ
C_RS09055	0.811881	0.393883	-6.42866	two-component system connector SafA
C_RS06350	1.42574	0.531043	-6.42384	ribonuclease E
C_RS29310	2.55446	0.35851	-6.42186	hypothetical protein
C_RS07795	0.722772	0.505668	-6.41351	peptide chain release factor 1
C_RS29685	0.772277	0.34343	-6.41239	hypothetical protein
C_RS00995	0.60396	0.966771	-6.3971	UDP-3-O-(3-hydroxymyristoyl)glucosamine N-acyltransferase
C_RS00730	0.574257	0.966771	-6.39681	carbonate dehydratase
C_RS04540	3.22772	0.291047	-6.37295	LysB family phage lysis regulatory protein
C_RS19685	0.60396	0.966771	-6.36472	ribulose-phosphate 3-epimerase
C_RS15740	0.693069	0.966771	-6.34876	2-C-methyl-D-erythritol 4-phosphate cytidylyltransferase
C_RS14695	5.64356	0.162513	-6.32441	anti-sigma-E factor RseA
C_RS11035	0.762376	0.312381	-6.31351	DUF2594 family protein
C_RS12075	0.544554	0.966771	-6.29603	YoeB-YefM toxin-antitoxin system antitoxin YefM
C_RS00085	0.811881	0.261868	-6.29601	molecular chaperone DnaJ
C_RS29795	0.752475	0.352842	-6.2784	hypothetical protein
C_RS17520	2.65347	0.287645	-6.27635	hypothetical protein
C_RS21825	0.742574	0.360636	-6.26106	membrane protein insertion efficiency factor YidD
C_RS13960	0.782178	0.283903	-6.2609	DUF1427 family protein
C_RS12165	1.26733	0.531088	-6.25991	glycosyltransferase family 2 protein
C_RS21015	0.782178	0.283423	-6.24344	lipopolysaccharide 3-alpha-galactosyltransferase
C_RS12175	0.772277	0.282614	-6.22466	O6 family O-antigen flippase
C_RS07060	3.58416	0.263975	-6.21559	phosphatase NudJ
C_RS23270	0.772277	0.304423	-6.20688	Si-specific NAD(P)(+) transhydrogenase
C_RS18730	3.20792	0.154043	-6.19064	lipid asymmetry maintenance protein MlaB
C_RS10400	0.712871	0.34804	-6.18787	DUF333 domain-containing lipoprotein YoaF
C_RS20925	0.70297	0.740661	-6.17555	NAD(P)H-dependent glycerol-3-phosphate dehydrogenase
C_RS00990	0.70297	0.367953	-6.16919	molecular chaperone Skp
C_RS28180	0.722772	0.28542	-6.16899	hypothetical protein
C_RS20140	0.594059	0.820424	-6.15757	signal recognition particle-docking protein FtsY
C_RS03690	1.0198	0.599604	-6.14382	K(+)-transporting ATPase subunit F
C_RS17525	0.70297	0.321396	-6.13033	pantoate--beta-alanine ligase
C_RS21785	2.25743	0.424574	-6.10944	YidB family protein
C_RS00515	0.950495	0.733333	-6.10541	cell division protein FtsQ
C_RS03820	0.792079	0.794487	-6.1042	cytochrome d ubiquinol oxidase subunit II
C_RS14640	0.851485	0.700822	-6.09283	type I toxin-antitoxin system toxin ShoB
C_RS16235	0.524752	0.966771	-6.07124	thymidylate synthase
C_RS14380	0.683168	0.301421	-6.07038	IMP dehydrogenase
C_RS03395	0.712871	0.869357	-6.05199	nicotinate-nucleotide adenylyltransferase
C_RS20330	0.60396	0.464761	-6.05111	hypothetical protein
C_RS01670	2.58416	0.439926	-6.04628	sigma-70 region 4 domain-containing protein
C_RS18665	0.772277	0.716198	-6.02666	ATP-dependent zinc metalloprotease FtsH
C_RS03475	0.574257	0.566372	-6.00912	2-octaprenyl-3-methyl-6-methoxy-1,4-benzoquinol hydroxylase
C_RS06285	0.643564	0.374987	-6.00885	anti-sigma-28 factor FlgM
C_RS05500	0.60396	0.426235	-5.98769	DUF3987 domain-containing protein
C_RS22730	0.50495	0.785541	-5.94339	DNA polymerase I
C_RS27375	0.574257	0.459955	-5.94309	DUF4222 domain-containing protein
C_RS03370	0.475248	0.966771	-5.92137	peptidoglycan glycosyltransferase MrdB
C_RS02395	0.50495	0.575557	-5.87607	protein translocase subunit SecF
C_RS03845	0.534653	0.966771	-5.87582	colicin uptake protein TolR
C_RS18350	0.554455	0.407617	-5.82797	hypothetical protein
C_RS08035	0.881188	0.566105	-5.81706	TonB system transport protein TonB
C_RS06970	0.80198	0.5296	-5.80524	hypothetical protein
C_RS13390	0.544554	0.352554	-5.80431	NADH-quinone oxidoreductase subunit NuoI
C_RS01040	0.435644	0.966771	-5.8041	tRNA lysidine(34) synthetase TilS
C_RS29050	2.48515	0.496156	-5.78314	hypothetical protein
C_RS18655	0.455446	0.569202	-5.77995	phosphoglucosamine mutase
C_RS03860	0.534653	0.357878	-5.77956	peptidoglycan-associated lipoprotein Pal
C_RS00500	0.475248	0.966771	-5.77925	undecaprenyldiphospho-muramoylpentapeptide beta-N-acetylglucosaminyltransferase
C_RS13380	0.514851	0.39518	-5.77883	NADH-quinone oxidoreductase subunit NuoK
C_RS03775	0.831683	0.586021	-5.77618	succinate dehydrogenase iron-sulfur subunit SdhB
C_RS06710	4.24752	0.103461	-5.76758	anti-adapter protein IraM
C_RS15555	0.475248	0.571249	-5.72788	helix-turn-helix domain-containing protein
C_RS15395	4.51485	0.154491	-5.71137	RNA ligase family protein
C_RS15455	0.49505	0.589605	-5.67602	carbon storage regulator CsrA
C_RS29130	0.49505	0.557989	-5.67564	DUF3927 family protein
C_RS22125	0.485149	0.542612	-5.67562	ilv operon leader peptide
C_RS29200	0.49505	0.474537	-5.64981	DUF1627 domain-containing protein
C_RS21340	2.9901	0.521933	-5.64822	ShlB/FhaC/HecB family hemolysin secretion/activation protein
C_RS20645	5.0198	0.10023	-5.59886	N-acetyltransferase
C_RS24165	4.44554	0.420219	-5.59756	phosphonate ABC transporter, permease protein PhnE
C_RS20035	0.49505	0.398353	-5.59367	hypothetical protein
C_RS18110	0.49505	0.544164	-5.5932	bifunctional dihydroneopterin aldolase/7,8-dihydroneopterin epimerase
C_RS05890	4.65347	0.0852935	-5.57758	hypothetical protein
C_RS00125	1.69307	0.546507	-5.57105	DUF2575 family protein
C_RS12120	11.5149	0.00487714	-5.57024	LPS O-antigen chain length determinant protein WzzB
C_RS00520	0.386139	0.966771	-5.56534	cell division protein FtsA
C_RS16665	3.31683	0.298807	-5.50704	energy-coupling factor ABC transporter ATP-binding protein
C_RS18975	0.445545	0.584732	-5.50643	rod shape-determining protein MreD
C_RS25300	0.445545	0.441792	-5.50567	DNA polymerase III subunit chi
C_RS19240	4.0297	0.418181	-5.50481	DUF1992 domain-containing protein
C_RS00530	0.425743	0.547999	-5.476	UDP-3-O-acyl-N-acetylglucosamine deacetylase
C_RS20125	0.435644	0.600686	-5.47578	RNA polymerase sigma factor RpoH
C_RS07045	0.386139	0.966771	-5.47573	adenylosuccinate lyase
C_RS28530	0.425743	0.494482	-5.47548	biotin/lipoyl-binding protein
C_RS17885	0.584158	0.564277	-5.47538	DUF2645 family protein
C_RS02975	0.643564	0.751881	-5.46939	ribosome-associated protein YbcJ
C_RS07775	0.534653	0.966771	-5.44789	ribose-phosphate diphosphokinase
C_RS23975	4.57426	0.40779	-5.42667	cytochrome c nitrite reductase Fe-S protein
C_RS04220	1.37624	0.505046	-5.40966	glutamine ABC transporter ATP-binding protein GlnQ
C_RS03760	0.435644	0.465166	-5.3807	succinate dehydrogenase cytochrome b556 subunit
C_RS02540	1.29703	0.4485	-5.37977	ATP-dependent Clp endopeptidase proteolytic subunit ClpP
C_RS11195	3.09901	0.300067	-5.37883	flagellar motor switch protein FliN
C_RS09645	6.53465	0.0455589	-5.35972	DNA-binding transcriptional regulator NemR
C_RS26775	0.415842	0.450274	-5.34706	hypothetical protein
C_RS14820	1.0198	0.374869	-5.33009	outer membrane protein assembly factor BamD
C_RS26815	0.376238	0.966771	-5.31407	trp operon leader peptide
C_RS11440	0.405941	0.453728	-5.31335	hypothetical protein
C_RS03410	0.386139	0.562348	-5.31324	leucine--tRNA ligase
C_RS23100	0.366337	0.966771	-5.31308	primosomal protein N'
C_RS01935	0.554455	0.567769	-5.30811	DUF1471 domain-containing protein
C_RS09390	2.62376	0.510766	-5.27834	multidrug/spermidine efflux SMR transporter subunit MdtJ
C_RS14310	2.17822	0.506467	-5.26268	arsenate reductase (glutaredoxin)
C_RS13995	0.336634	0.966771	-5.24386	NAD-dependent DNA ligase LigA
C_RS02550	4.76238	0.0861545	-5.23152	endopeptidase La
C_RS13930	0.356436	0.966771	-5.2071	glutamate--tRNA ligase
C_RS25185	2.90099	0.223401	-5.17506	cytochrome b562
C_RS03460	1.27723	0.542538	-5.17248	rRNA maturation RNase YbeY
C_RS21990	0.346535	0.966771	-5.16943	F0F1 ATP synthase subunit A
C_RS13160	0.316832	0.966771	-5.16928	bifunctional 3-demethylubiquinone 3-O-methyltransferase/2-octaprenyl-6-hydroxy phenol methylase
C_RS00725	8.40594	0.10909	-5.15929	hypoxanthine phosphoribosyltransferase
C_RS18985	0.455446	0.966771	-5.15879	rod shape-determining protein MreB
C_RS18465	3.20792	0.315907	-5.15308	PTS sugar transporter subunit IIA
C_RS00310	1.08911	0.666176	-5.14621	LPS assembly protein LptD
C_RS19185	0.326733	0.966771	-5.13023	L-threonylcarbamoyladenylate synthase type 1 TsaC
C_RS10650	2.89109	0.396209	-5.12964	YebY family protein
C_RS14975	3.83168	0.249633	-5.12777	hypothetical protein
C_RS11420	0.623762	0.575653	-5.10087	DUF4756 family protein
C_RS29735	0.455446	0.618483	-5.08198	hypothetical protein
C_RS24205	0.336634	0.442536	-5.05109	LpxT activity modulator PmrR
C_RS03840	0.287129	0.966771	-5.05029	Tol-Pal system protein TolQ
C_RS06630	0.326733	0.473738	-5.05018	hypothetical protein
C_RS29085	0.306931	0.488592	-5.04991	protein YliM
C_RS12960	4.35644	0.305508	-5.02502	nitrate/nitrite response regulator protein NarP
C_RS29805	0.316832	0.547439	-5.00881	hypothetical protein
C_RS14770	0.326733	0.549628	-5.00827	CDP-diacylglycerol--serine O-phosphatidyltransferase
C_RS16215	1.9703	0.467703	-4.99372	prepilin-type N-terminal cleavage/methylation domain-containing protein
C_RS03795	1.10891	0.436867	-4.9691	ADP-forming succinate--CoA ligase subunit beta
C_RS06275	0.29703	0.966771	-4.96618	murein biosynthesis integral membrane protein MurJ
C_RS18600	0.306931	0.617075	-4.9658	30S ribosomal protein S15
C_RS29425	0.29703	0.617075	-4.96559	protein YqfH
C_RS23335	0.29703	0.966771	-4.9652	bifunctional biotin--[acetyl-CoA-carboxylase] ligase/biotin operon repressor BirA
C_RS29690	2.37624	0.2284	-4.92934	integrase
C_RS23745	0.425743	0.966771	-4.92852	repressor LexA
C_RS07950	5.05941	0.149917	-4.92174	two-component system response regulator RssB
C_RS24060	0.29703	0.592931	-4.92089	hypothetical protein
C_RS08870	2.53465	0.486918	-4.91943	hypothetical protein
C_RS09555	3.63366	0.15901	-4.91603	electron transport complex subunit RsxE
C_RS11310	2.85149	0.268972	-4.90524	hydroxyisourate hydrolase
C_RS05710	3.26733	0.473524	-4.88584	Exc2 family lipoprotein
C_RS29535	0.287129	0.569088	-4.87402	hypothetical protein
C_RS16210	1.11881	0.27167	-4.87358	exodeoxyribonuclease V subunit gamma
C_RS17835	1.24752	0.544319	-4.8691	TRAP transporter small permease
C_RS19745	0.356436	0.587807	-4.86764	intracellular growth attenuator protein IgaA
C_RS11230	2.42574	0.691305	-4.85827	peroxide/acid resistance protein YodD
C_RS01545	3.11881	0.179324	-4.84746	transposase
C_RS18615	0.732673	0.40702	-4.83461	translation initiation factor IF-2
C_RS15205	0.277228	0.966771	-4.82853	LexA family transcriptional regulator
C_RS00690	0.29703	0.470507	-4.82802	bifunctional aconitate hydratase 2/2-methylisocitrate dehydratase
C_RS14020	0.277228	0.966771	-4.82748	phosphoenolpyruvate-protein phosphotransferase PtsI
C_RS21040	0.257426	0.589156	-4.82735	pantetheine-phosphate adenylyltransferase
C_RS03790	0.762376	0.554661	-4.80541	2-oxoglutarate dehydrogenase complex dihydrolipoyllysine-residue succinyltransferase
C_RS18550	3.78218	0.106427	-4.78584	N-acetyltransferase
C_RS18625	0.237624	0.966771	-4.77791	ribosome maturation factor RimP
C_RS00130	0.277228	0.966771	-4.77788	bifunctional riboflavin kinase/FAD synthetase
C_RS00290	5.05941	0.0884693	-4.75181	Co2+/Mg2+ efflux protein ApaG
C_RS16520	0.277228	0.407199	-4.73049	FAD assembly factor SdhE
C_RS08960	0.267327	0.533951	-4.72886	HigA family addiction module antidote protein
C_RS12910	0.267327	0.966771	-4.72804	50S ribosomal protein L25
C_RS10660	3.62376	0.305011	-4.72232	CopC domain-containing protein YobA
C_RS18925	4.32673	0.273204	-4.71879	peroxide/acid stress response protein YhcN
C_RS14240	3.60396	0.140981	-4.70153	ArsC family reductase
C_RS22245	0.356436	0.598156	-4.69972	lipid III flippase WzxE
C_RS23340	0.267327	0.5625	-4.67557	type I pantothenate kinase
C_RS24150	1.43564	0.566488	-4.65738	phosphonate C-P lyase system protein PhnH
C_RS17490	10.4257	0.0106938	-4.64862	3-deoxy-manno-octulosonate cytidylyltransferase
C_RS00830	4.65347	0.169201	-4.64798	RNA polymerase-binding protein DksA
C_RS15285	2.75248	0.447717	-4.64484	YqaE/Pmp3 family membrane protein
C_RS03830	2.09901	0.456512	-4.63765	cyd operon protein YbgE
C_RS19975	0.316832	0.716693	-4.6327	aspartate-semialdehyde dehydrogenase
C_RS24820	0.247525	0.966771	-4.62185	tRNA (adenosine(37)-N6)-threonylcarbamoyltransferase complex ATPase subunit type 1 TsaE
C_RS07900	9.80198	0.0436839	-4.61881	MBL fold metallo-hydrolase
C_RS24865	1.51485	0.559785	-4.61158	adenylosuccinate synthase
C_RS09085	5.94059	0.0339632	-4.61138	fimbria/pilus periplasmic chaperone
C_RS29765	1.06931	0.539873	-4.608	DUF905 family protein
C_RS20135	7.20792	0.00977465	-4.60591	cell division ATP-binding protein FtsE
C_RS01480	1.58416	0.481054	-4.60145	cupin domain-containing protein
C_RS12250	8.22772	0.0738948	-4.58165	putative colanic acid polymerase WcaD
C_RS25310	0.237624	0.966771	-4.56478	LPS export ABC transporter permease LptF
C_RS20685	0.29703	0.709807	-4.56098	glycine--tRNA ligase subunit beta
C_RS05355	1.50495	0.594857	-4.54548	hypothetical protein
C_RS03315	2.0297	0.393524	-4.51318	transcription antiterminator/RNA stability regulator CspE
C_RS14620	0.405941	0.733742	-4.5081	tRNA adenosine(34) deaminase TadA
C_RS14665	0.237624	0.966771	-4.50647	GTPase Era
C_RS02210	0.227723	0.966771	-4.50635	porphobilinogen synthase
C_RS22170	0.217822	0.966771	-4.50633	DNA helicase Rep
C_RS18660	0.217822	0.966771	-4.50599	dihydropteroate synthase
C_RS08480	3.35644	0.281836	-4.49987	hypothetical protein
C_RS24370	3.0198	0.35634	-4.49095	type IV toxin-antitoxin system YeeU family antitoxin
C_RS10870	6.36634	0.062338	-4.45391	protein phosphatase CheZ
C_RS28510	1	0.456801	-4.4479	hypothetical protein
C_RS00755	2.56436	0.267913	-4.44761	aspartate 1-decarboxylase
C_RS01880	0.227723	0.617075	-4.445	hypothetical protein
C_RS12740	0.217822	0.966771	-4.44496	GTP cyclohydrolase I FolE
C_RS11450	0.227723	0.617075	-4.44474	AlpA family transcriptional regulator
C_RS00955	0.217822	0.966771	-4.44472	UMP kinase
C_RS00470	0.227723	0.966771	-4.44458	peptidoglycan glycosyltransferase FtsI
C_RS15745	0.217822	0.966771	-4.44418	cell division protein FtsB
C_RS28500	0.217822	0.583983	-4.44406	prophage lysis lipoprotein RzoD
C_RS19675	0.227723	0.966771	-4.44404	tryptophan--tRNA ligase
C_RS22190	0.188119	0.966771	-4.4434	rho operon leader peptide rhoL
C_RS16015	4.20792	0.187928	-4.39785	DUF423 domain-containing protein
C_RS14950	1.37624	0.512938	-4.3888	cold shock protein YdfK
C_RS20385	5.09901	0.0435041	-4.38383	anaerobilin reductase
C_RS00940	0.217822	0.966771	-4.38089	type I methionyl aminopeptidase
C_RS14480	0.19802	0.966771	-4.38017	ISC system 2Fe-2S type ferredoxin
C_RS27085	0.217822	0.583983	-4.37951	hypothetical protein
C_RS12015	4.61386	0.0460406	-4.34283	hypothetical protein
C_RS28110	2.31683	0.447784	-4.3363	hypothetical protein
C_RS07360	0.930693	0.594389	-4.32225	phage head-stabilizing protein
C_RS04545	3.28713	0.414623	-4.31819	phage tail protein
C_RS07785	0.188119	0.966771	-4.31354	lipoprotein localization protein LolB
C_RS05015	0.207921	0.966771	-4.31316	chromosome partition protein MukB
C_RS06385	0.19802	0.966771	-4.3131	beta-ketoacyl-ACP synthase III
C_RS25390	2.85149	0.492522	-4.3042	DUF1819 family protein
C_RS19095	1.0297	0.581135	-4.29193	DUF2556 family protein
C_RS24675	7.06931	0.425818	-4.2715	aspartate ammonia-lyase
C_RS22880	2.91089	0.383341	-4.26801	CopG family transcriptional regulator
C_RS06975	2.12871	0.376931	-4.25368	hypothetical protein
C_RS25240	0.19802	0.580605	-4.24392	pyr operon leader peptide
C_RS09585	0.19802	0.966771	-4.24272	tyrosine--tRNA ligase
C_RS23390	0.19802	0.966771	-4.24225	50S ribosomal protein L1
C_RS19740	4.67327	0.0636859	-4.23284	ADP compounds hydrolase NudE
C_RS15315	3.67327	0.365474	-4.23064	DUF883 domain-containing protein
C_RS19890	4.90099	0.260638	-4.22155	thiosulfate sulfurtransferase GlpE
C_RS05625	2.84158	0.362585	-4.22105	acyl carrier protein
C_RS21695	4.77228	0.174081	-4.21452	YidH family protein
C_RS05515	2.68317	0.238872	-4.17922	hypothetical protein
C_RS28605	1.10891	0.594686	-4.17671	protein YoaJ
C_RS01010	0.188119	0.966771	-4.16934	lipid-A-disaccharide synthase
C_RS00505	0.178218	0.966771	-4.16889	UDP-N-acetylmuramate--L-alanine ligase
C_RS15110	0.158416	0.966771	-4.16888	addiction module toxin, GnsA/GnsB family
C_RS21765	12.1386	0.0284219	-4.14698	2-dehydro-3-deoxygalactonokinase
C_RS08250	5.76238	0.0271664	-4.13135	TetR/AcrR family transcriptional regulator
C_RS04265	3.9703	0.255888	-4.12962	manganese-binding transcriptional regulator MntR
C_RS04430	4.32673	0.162921	-4.1123	hypothetical protein
C_RS11065	7.63366	0.133251	-4.11124	cystine ABC transporter substrate-binding protein
C_RS08430	11.4356	0.123145	-4.10691	SDR family oxidoreductase
C_RS13205	14.7129	0.103007	-4.10599	anaerobic glycerol-3-phosphate dehydrogenase subunit A
C_RS22600	2.45545	0.32014	-4.10318	Sec-independent protein translocase subunit TatA
C_RS16410	2.28713	0.50028	-4.09863	molybdenum cofactor cytidylyltransferase
C_RS00930	0.178218	0.576458	-4.09244	2,3,4,5-tetrahydropyridine-2,6-dicarboxylate N-succinyltransferase
C_RS27185	0.178218	0.966771	-4.09078	his operon leader peptide
C_RS18140	0.178218	0.966771	-4.09058	tRNA (adenosine(37)-N6)-threonylcarbamoyltransferase complex transferase subunit TsaD
C_RS02200	5.15842	0.416203	-4.08307	taurine ABC transporter permease TauC
C_RS15115	2.41584	0.391277	-4.07389	hypothetical protein
C_RS09670	2.55446	0.392102	-4.06573	monothiol glutaredoxin 4
C_RS14150	5.9505	0.212757	-4.053	ethanolamine utilization protein EutJ
C_RS09355	9.0099	0.0249739	-4.04889	DNA-binding transcriptional repressor Mlc
C_RS22395	1.27723	0.452689	-4.01945	DUF3289 family protein
C_RS19930	2.59406	0.424204	-4.01206	type 1 fimbrial protein
C_RS02490	6.17822	0.263279	-4.01054	protoheme IX farnesyltransferase
C_RS20985	0.168317	0.966771	-4.00912	lipopolysaccharide heptosyltransferase RfaC
C_RS06525	0.168317	0.57401	-4.00883	lipoprotein-releasing ABC transporter permease subunit LolE
C_RS24605	1.60396	0.451478	-3.99339	PerC family transcriptional regulator
C_RS19420	3.53465	0.157738	-3.99149	type II secretion system minor pseudopilin GspH
C_RS04860	1.24752	0.539713	-3.98348	DNA translocase FtsK
C_RS21665	3.78218	0.0792925	-3.97024	acetolactate synthase small subunit
C_RS15880	0.574257	0.659862	-3.96539	phosphopyruvate hydratase
C_RS06865	4.0198	0.462279	-3.96501	tail assembly protein
C_RS15930	6.0297	0.405294	-3.95849	tRNA pseudouridine(65) synthase TruC
C_RS10770	0.782178	0.401307	-3.94078	Holliday junction branch migration DNA helicase RuvB
C_RS02675	6.23762	0.127262	-3.93335	multidrug efflux transporter transcriptional repressor AcrR
C_RS01805	0.90099	0.440216	-3.92397	MarR family transcriptional regulator
C_RS01710	1.20792	0.490899	-3.9231	D-sedoheptulose 7-phosphate isomerase
C_RS07625	2.50495	0.487923	-3.92196	hemolysin E
C_RS06725	2.65347	0.266035	-3.90731	YdfR family protein
C_RS01585	0.712871	0.202656	-3.89233	hypothetical protein
C_RS08555	6.63366	0.11059	-3.89063	universal stress protein UspF
C_RS03080	3.16832	0.351458	-3.88667	MmcQ/YjbR family DNA-binding protein
C_RS03355	0.455446	0.766807	-3.87577	YbeD family protein
C_RS23735	1.0099	0.0383105	-3.87384	glycerol-3-phosphate 1-O-acyltransferase PlsB
C_RS15700	4.66337	0.450926	-3.86916	MBL fold metallo-hydrolase
C_RS10985	3.18812	0.14739	-3.8656	YecH family protein
C_RS01370	2.52475	0.465697	-3.86329	hypothetical protein
C_RS12890	2.55446	0.304334	-3.84806	hypothetical protein
C_RS20885	1.32673	0.577057	-3.84656	YibL family ribosome-associated protein
C_RS19225	2.9505	0.361129	-3.83799	large-conductance mechanosensitive channel protein MscL
C_RS09690	0.148515	0.568109	-3.82971	stress response protein YnhF
C_RS15885	0.138614	0.966771	-3.82854	CTP synthase (glutamine hydrolyzing)
C_RS09985	0.148515	0.617075	-3.82786	phenylalanine--tRNA ligase subunit alpha
C_RS02450	0.148515	0.966771	-3.82744	1-deoxy-D-xylulose-5-phosphate synthase
C_RS06765	0.148515	0.617075	-3.82727	YlcI/YnfO family protein
C_RS14015	0.148515	0.966771	-3.82678	phosphocarrier protein Hpr
C_RS01115	0.148515	0.966771	-3.82652	D-glycero-beta-D-manno-heptose 1,7-bisphosphate 7-phosphatase
C_RS05670	0.732673	0.525222	-3.81812	hypothetical protein
C_RS11410	4.0198	0.249652	-3.81226	replication/maintenance protein RepL
C_RS12970	5.9802	0.108927	-3.81176	thiol:disulfide interchange protein DsbE
C_RS04730	2.24752	0.460826	-3.79276	heavy metal-binding domain-containing protein
C_RS01415	5.64356	0.212095	-3.79232	hypothetical protein
C_RS08165	2.08911	0.523813	-3.78508	hypothetical protein
C_RS09520	3.76238	0.172565	-3.78014	transcription modulator YdgT
C_RS11315	8.79208	0.158776	-3.77603	protein-methionine-sulfoxide reductase catalyticsubunit MsrP
C_RS00110	4.21782	0.374971	-3.76164	Na+/H+ antiporter NhaA
C_RS05505	8.45545	0.34009	-3.73813	DUF3987 domain-containing protein
C_RS12920	0.138614	0.617075	-3.72961	YejL family protein
C_RS29175	0.138614	0.966771	-3.72869	hypothetical protein
C_RS21920	0.138614	0.966771	-3.72848	phosphate signaling complex protein PhoU
C_RS02420	0.138614	0.966771	-3.72835	bifunctional diaminohydroxyphosphoribosylaminopyrimidine deaminase/5-amino-6-(5-phosphoribosylamino)uracil reductase RibD
C_RS03615	0.138614	0.966771	-3.72741	fur leader peptide
C_RS11875	13.7426	0.010265	-3.7262	IS110-like element ISEc20 family transposase
C_RS29180	3.63366	0.115403	-3.72009	YciY family protein
C_RS07735	5.9901	0.194167	-3.71369	dihydroxyacetone kinase ADP-binding subunit DhaL
C_RS00465	0.891089	0.714925	-3.70957	cell division protein FtsL
C_RS14655	3.37624	0.445624	-3.70207	pyridoxine 5'-phosphate synthase
C_RS22620	6.31683	0.0208154	-3.68809	transcription/translation regulatory transformerprotein RfaH
C_RS25880	2.18812	0.516654	-3.68681	helix-turn-helix domain-containing protein
C_RS14945	2.91089	0.365494	-3.67758	DinI-like family protein
C_RS07220	1.35644	0.482766	-3.65266	DUF1828 domain-containing protein
C_RS06840	4.42574	0.29631	-3.64991	phage tail assembly protein T
C_RS09605	7.13861	0.0265254	-3.64506	outer membrane lipoprotein SlyB
C_RS07600	3.93069	0.37339	-3.64253	hypothetical protein
C_RS06235	3.32673	0.422072	-3.63769	DNA damage-inducible protein I
C_RS08320	2.16832	0.45138	-3.62613	envelope stress response membrane protein PspB
C_RS04475	0.128713	0.966771	-3.62224	hypothetical protein
C_RS08245	0.128713	0.966771	-3.62184	enoyl-ACP reductase FabI
C_RS04830	0.128713	0.966771	-3.62154	translation initiation factor IF-1
C_RS18065	0.118812	0.966771	-3.62147	bifunctional D-glycero-beta-D-manno-heptose-7-phosphate kinase/D-glycero-beta-D-manno-heptose 1-phosphate adenylyltransferase HldE
C_RS22195	0.128713	0.966771	-3.62141	transcription termination factor Rho
C_RS18115	6.0495	0.0486441	-3.62118	glycerol-3-phosphate 1-O-acyltransferase PlsY
C_RS10035	5.34653	0.0408549	-3.62099	type V toxin-antitoxin system endoribonuclease antitoxin GhoS
C_RS05245	11.8416	0.00757074	-3.61914	Ni/Fe-hydrogenase b-type cytochrome subunit
C_RS01015	2.74257	0.431149	-3.61904	ribonuclease HII
C_RS18295	4.28713	0.201771	-3.60669	DedA family protein
C_RS20130	13.4554	0.000969556	-3.60518	cell division protein FtsX
C_RS00785	3.76238	0.394488	-3.60304	fimbrial protein
C_RS01090	6.81188	0.0786417	-3.60007	tRNA (N6-threonylcarbamoyladenosine(37)-N6)-methyltransferase TrmO
C_RS06545	3.51485	0.328246	-3.58956	DUF3592 domain-containing protein
C_RS13745	4.35644	0.193796	-3.58729	tyrosine-type recombinase/integrase
C_RS14025	0.19802	0.966771	-3.57403	PTS glucose transporter subunit IIA
C_RS17850	0.168317	0.666629	-3.56835	1-acylglycerol-3-phosphate O-acyltransferase
C_RS23090	4.09901	0.0748389	-3.55868	cell division protein FtsN
C_RS12260	4.51485	0.0736378	-3.55619	colanic acid biosynthesis acetyltransferase WcaB
C_RS10320	6.05941	0.0603864	-3.53674	YeaC family protein
C_RS08865	1.9802	0.455809	-3.52116	peptidase M35
C_RS12225	4.05941	0.344652	-3.51601	GDP-mannose mannosyl hydrolase
C_RS22585	0.118812	0.966771	-3.50591	bifunctional demethylmenaquinone methyltransferase/2-methoxy-6-polyprenyl-1,4-benzoquinol methylase UbiE
C_RS02955	0.118812	0.966771	-3.5058	UDP-2,3-diacylglucosamine diphosphatase
C_RS09930	9.82178	0.099662	-3.50489	posphoenolpyruvate synthetase regulatory kinase/phosphorylase PpsR
C_RS01500	1.61386	0.470583	-3.50192	CPBP family intramembrane metalloprotease
C_RS01485	7.9703	0.187662	-3.49823	MFS transporter
C_RS15980	6.19802	0.118502	-3.49766	L-fuculose-phosphate aldolase
C_RS20095	9.75248	0.27873	-3.48908	branched chain amino acid ABC transporter permease LivM
C_RS03785	0.207921	0.679627	-3.48334	2-oxoglutarate dehydrogenase E1 component
C_RS02190	7.94059	0.167078	-3.48218	taurine ABC transporter substrate-binding protein
C_RS08155	0.782178	0.670001	-3.47326	HTH-type transcriptional regulator CysB
C_RS12295	0.752475	0.633298	-3.46463	dCTP deaminase
C_RS12160	0.940594	0.533495	-3.46357	glycosyltransferase family 4 protein
C_RS04435	3.10891	0.196036	-3.46129	phage regulatory CII family protein
C_RS03530	11.6931	0.0179785	-3.44749	N-acetylglucosamine-6-phosphate deacetylase
C_RS00910	8.0198	0.0232426	-3.44225	serine endoprotease DegP
C_RS11305	7.33663	0.247964	-3.42722	response regulator transcription factor HprR
C_RS18750	13.2475	0.000847995	-3.42703	phospholipid ABC transporter ATP-binding proteinMlaF
C_RS16995	4.51485	0.203388	-3.41462	MarR family transcriptional regulator
C_RS24490	3.69307	0.42542	-3.40448	P fimbrial minor subunit PapE
C_RS22255	5.55446	0.286965	-3.39592	ECA oligosaccharide polymerase
C_RS14485	0.0990099	0.966771	-3.38279	Fe-S protein assembly chaperone HscA
C_RS02455	0.108911	0.966771	-3.38039	(2E,6E)-farnesyl diphosphate synthase
C_RS16750	0.108911	0.966771	-3.37977	methionine adenosyltransferase
C_RS15935	2.82178	0.215783	-3.36108	YqcC family protein
C_RS19940	3.07921	0.489606	-3.3538	fimbria/pilus periplasmic chaperone
C_RS15195	1.84158	0.435452	-3.35102	hypothetical protein
C_RS25285	7.43564	0.440665	-3.34848	GNAT family N-acetyltransferase
C_RS11325	5	0.335929	-3.34838	metal-binding protein ZinT
C_RS01425	5.9703	0.349357	-3.34526	hypothetical protein
C_RS16065	2.17822	0.389962	-3.34484	type VI secretion system contractile sheath small subunit
C_RS13110	6.26733	0.179973	-3.33739	acetate CoA-transferase subunit alpha
C_RS19220	1.56436	0.364368	-3.33204	Trk system potassium transporter TrkA
C_RS10300	5.61386	0.382252	-3.32997	ketose-bisphosphate aldolase
C_RS15375	5.48515	0.334061	-3.3256	L-valine transporter subunit YgaH
C_RS01870	1.91089	0.396391	-3.32098	50S ribosomal protein L36
C_RS14070	9.54455	0.0334832	-3.3092	N-acetylmuramic acid 6-phosphate etherase
C_RS03385	2.60396	0.24205	-3.30895	ribosome silencing factor
C_RS23805	0.980198	0.70533	-3.30136	replicative DNA helicase
C_RS06565	3.60396	0.269518	-3.29763	excisionase
C_RS07570	2.50495	0.445007	-3.29596	glycine zipper family protein
C_RS16840	4.09901	0.303229	-3.2901	YggL family protein
C_RS19210	0.0990099	0.966771	-3.2447	methionyl-tRNA formyltransferase
C_RS28480	0.0990099	0.966771	-3.24399	excisionase
C_RS25000	0.0990099	0.966771	-3.24381	50S ribosomal protein L9
C_RS14425	0.0990099	0.966771	-3.24333	histidine--tRNA ligase
C_RS04945	0.0990099	0.966771	-3.24316	(d)CMP kinase
C_RS24790	0.0990099	0.966771	-3.24263	oligoribonuclease
C_RS23380	0.0990099	0.966771	-3.24227	transcription termination/antitermination protein NusG
C_RS03215	7.11881	0.121008	-3.24077	ParB-like nuclease domain-containing protein
C_RS03255	7.94059	0.144715	-3.23896	ribonuclease I
C_RS27110	1.45545	0.514716	-3.22445	IS3 family transposase
C_RS16900	3.23762	0.333947	-3.22179	IS66 family insertion sequence hypothetical protein
C_RS23060	8.35644	0.138932	-3.21889	glycerol uptake facilitator protein GlpF
C_RS01150	6.94059	0.0804391	-3.21857	2,5-didehydrogluconate reductase DkgB
C_RS25425	9.9703	0.274048	-3.21667	N-acetylneuraminate epimerase
C_RS01465	2.62376	0.287796	-3.20571	RpiB/LacA/LacB family sugar-phosphate isomerase
C_RS12290	14.7426	0.050775	-3.20316	outer membrane assembly protein AsmA
C_RS17770	7.26733	0.232019	-3.20125	DedA family protein
C_RS15370	7.91089	0.103141	-3.1793	L-valine exporter subunit YgaZ
C_RS12435	4.73267	0.224948	-3.17743	tagatose-bisphosphate aldolase subunit GatY
C_RS18805	4.0396	0.101381	-3.17724	PTS phosphocarrier protein NPr
C_RS14925	3.48515	0.522714	-3.16219	RnfH family protein
C_RS17110	0.811881	0.715749	-3.15666	hypothetical protein
C_RS05630	1.12871	0.567402	-3.14381	acyl carrier protein
C_RS04660	6.39604	0.101192	-3.14193	YbjN domain-containing protein
C_RS17010	4.24752	0.489428	-3.13671	P fimbrial minor subunit PapE
C_RS02010	3.44554	0.48697	-3.13261	transcriptional regulator BetI
C_RS18160	3.19802	0.441382	-3.12769	G/U mismatch-specific DNA glycosylase
C_RS08330	1.12871	0.520132	-3.12566	phage shock protein PspD
C_RS28590	1.17822	0.601789	-3.12475	hypothetical protein
C_RS08660	3.05941	0.166691	-3.11335	hypothetical protein
C_RS02065	6.91089	0.205709	-3.10969	carbamate kinase family protein
C_RS06390	0.148515	0.660223	-3.10951	ACP S-malonyltransferase
C_RS10635	2.16832	0.364751	-3.1032	YebW family protein
C_RS23720	10.2673	0.247301	-3.10258	maltose operon protein MalM
C_RS22650	7.15842	0.239157	-3.09415	IMPACT family protein
C_RS25140	0.0891089	0.966771	-3.09278	inorganic diphosphatase
C_RS08195	0.0891089	0.966771	-3.09225	lipopolysaccharide assembly protein LapB
C_RS00815	0.0891089	0.966771	-3.09213	2-amino-4-hydroxy-6- hydroxymethyldihydropteridine diphosphokinase
C_RS14500	0.0891089	0.966771	-3.09163	Fe-S cluster assembly scaffold IscU
C_RS29225	0.0891089	0.966771	-3.09157	transposase
C_RS21925	0.0891089	0.966771	-3.09113	phosphate ABC transporter ATP-binding protein PstB
C_RS00120	0.0891089	0.966771	-3.09089	30S ribosomal protein S20
C_RS16560	0.0891089	0.966771	-3.0899	FAD-dependent 2-octaprenylphenol hydroxylase
C_RS20810	2.65347	0.382593	-3.07537	3-keto-L-gulonate-6-phosphate decarboxylase UlaD
C_RS07545	3.81188	0.385998	-3.07488	hypothetical protein
C_RS04560	5.18812	0.129385	-3.07376	GPW/gp25 family protein
C_RS19790	10.7822	0.0336094	-3.07319	two-component system sensor histidine kinase EnvZ
C_RS04175	12.6733	0.0448395	-3.05958	DNA-binding protein YbiB
C_RS07195	6.13861	0.291626	-3.05131	DUF2528 family protein
C_RS15325	6.83168	0.0645695	-3.04647	carboxymuconolactone decarboxylase family protein
C_RS18915	1.67327	0.519048	-3.04372	malate dehydrogenase
C_RS00305	1.0396	0.557016	-3.03929	peptidylprolyl isomerase SurA
C_RS16180	1.84158	0.432276	-3.03587	PRD domain-containing protein
C_RS21080	4.84158	0.394251	-3.03505	orotate phosphoribosyltransferase
C_RS14935	1.71287	0.517343	-3.02931	SsrA-binding protein SmpB
C_RS02860	4.9604	0.056725	-3.02143	ureidoglycolate lyase
C_RS04085	5.83168	0.320846	-3.01952	molybdenum cofactor biosynthesis protein B
C_RS22625	0.653465	0.711653	-3.01783	4-hydroxy-3-polyprenylbenzoate decarboxylase
C_RS08620	19.6337	0.00920557	-3.01755	bifunctional alpha/beta hydrolase/class I SAM-dependent methyltransferase
C_RS07530	1.37624	0.558579	-3.01737	biofilm/acid-resistance regulator AriR
C_RS08315	6.18812	0.103085	-3.01735	phage shock protein PspA
C_RS24745	5.80198	0.220458	-3.01161	fumarate reductase subunit FrdD
C_RS05385	4.18812	0.284959	-3.00893	malonic semialdehyde reductase
C_RS10995	5.49505	0.0796607	-3.00743	UPF0149 family protein YecA
C_RS04285	14.1782	0.0547789	-3.00366	sugar-phosphatase YbiV
C_RS07910	7.51485	0.317801	-3.00135	inositol phosphorylceramide synthase
C_RS18770	2.57426	0.206762	-3.00129	LPS export ABC transporter periplasmic protein LptC
C_RS20145	4.76238	0.379496	-2.99761	16S rRNA (guanine(966)-N(2))-methyltransferase
C_RS16830	7.10891	0.430297	-2.99712	DUF2884 domain-containing protein
C_RS05800	7.54455	0.121691	-2.99432	hypothetical protein
C_RS12190	8.75248	0.208369	-2.9912	colanic acid biosynthesis glycosyltransferase WcaL
C_RS16945	1.24752	0.59886	-2.98262	alpha-hemolysin-activating lysine-acyltransferase HlyC
C_RS08310	11.099	0.0506503	-2.97725	phage shock protein operon transcriptional activator
C_RS12330	5.47525	0.260116	-2.96996	VWA domain-containing protein
C_RS20820	10.3663	0.0453241	-2.96753	L-ribulose-5-phosphate 4-epimerase
C_RS18335	5.14851	0.284139	-2.96462	DUF805 domain-containing protein
C_RS00005	1.43564	0.519618	-2.96113	thr operon leader peptide
C_RS15680	9.82178	0.122221	-2.9588	four-carbon acid sugar kinase family protein
C_RS08755	10.9604	0.079072	-2.9529	ABC transporter ATP-binding protein
C_RS09205	1.61386	0.4702	-2.95256	PTS lactose/cellobiose transporter subunit IIA
C_RS22700	1.46535	0.532117	-2.94629	YihD family protein
C_RS21485	2.81188	0.388269	-2.94242	transposase
C_RS20340	7.77228	0.157695	-2.94096	glutaredoxin-dependent arsenate reductase
C_RS07620	7.90099	0.100095	-2.92486	YcgN family cysteine cluster protein
C_RS21965	0.0792079	0.966771	-2.92303	F0F1 ATP synthase subunit gamma
C_RS02435	0.0792079	0.966771	-2.92172	thiamine-phosphate kinase
C_RS13410	0.0792079	0.966771	-2.92072	NADH-quinone oxidoreductase subunit NuoE
C_RS21830	0.0792079	0.966771	-2.9193	membrane protein insertase YidC
C_RS26700	1.37624	0.509101	-2.91569	tail fiber assembly protein
C_RS04585	2.62376	0.523601	-2.90995	acyltransferase
C_RS06785	0.990099	0.496982	-2.90648	head-tail joining protein
C_RS19230	4.33663	0.457619	-2.89715	alternative ribosome-rescue factor ArfA
C_RS29185	0.782178	0.590974	-2.89567	hypothetical protein
C_RS28135	7.66337	0.104352	-2.88323	HipA domain-containing protein
C_RS05030	5.72277	0.476288	-2.88111	hydroxyacylglutathione hydrolase GloC
C_RS00595	6.69307	0.193948	-2.87959	prepilin peptidase-dependent pilin
C_RS25790	1.90099	0.328128	-2.87699	DUF1328 domain-containing protein
C_RS25050	5.46535	0.161338	-2.86837	cell division protein YtfB
C_RS18840	12.9901	0.010299	-2.86434	glutamate synthase subunit GltD
C_RS16780	2.69307	0.272121	-2.86187	YqgE/AlgH family protein
C_RS23185	12.2574	0.0868007	-2.85852	fructose-6-phosphate aldolase
C_RS22205	14.2871	0.0140715	-2.85627	UDP-N-acetylglucosamine--undecaprenyl-phosphate N-acetylglucosaminephosphotransferase
C_RS25925	24.2079	0.000574816	-2.85618	two-component system sensor histidine kinase CreC
C_RS00710	2.9505	0.394436	-2.85549	YacC family pilotin-like protein
C_RS07455	1.24752	0.496483	-2.85311	hypothetical protein
C_RS10700	1.70297	0.462195	-2.84081	protein YebF
C_RS04520	2.21782	0.58318	-2.83723	tail protein X
C_RS01460	3.75248	0.18361	-2.82831	AlpA family transcriptional regulator
C_RS19660	11.2079	0.161288	-2.82727	YhfX family PLP-dependent enzyme
C_RS06480	5.82178	0.211977	-2.82479	glycine zipper 2TM domain-containing protein
C_RS24625	7.17822	0.564865	-2.82206	AAA family ATPase
C_RS10480	6.72277	0.0631251	-2.8217	DUF1889 family protein
C_RS07050	2.57426	0.452005	-2.82101	high frequency lysogenization protein HflD
C_RS14745	8.54455	0.29401	-2.81633	tRNA/rRNA methyltransferase
C_RS24960	3.9505	0.32338	-2.81151	3-keto-L-gulonate-6-phosphate decarboxylase UlaD
C_RS23020	0.752475	0.966771	-2.8064	triose-phosphate isomerase
C_RS24170	4.9703	0.382727	-2.80272	phosphonate ABC transporter substrate-binding protein
C_RS12370	3.05941	0.483137	-2.79682	hypothetical protein
C_RS02945	2.33663	0.517562	-2.79653	5-(carboxyamino)imidazole ribonucleotide mutase
C_RS11900	4.34653	0.221578	-2.78052	hypothetical protein
C_RS16540	24.604	0.00312236	-2.78043	6-phospho-beta-glucosidase BglA
C_RS16815	9.0297	0.097654	-2.77572	radical SAM family heme chaperone HemW
C_RS04390	3.53465	0.173442	-2.77421	hypothetical protein
C_RS15595	7.24752	0.307577	-2.77339	formate hydrogenlyase subunit HycD
C_RS17865	6.84158	0.0881047	-2.77236	GyrI-like domain-containing protein
C_RS06340	21.8317	0.0355567	-2.77161	flagellar hook-associated protein FlgK
C_RS10085	7.23762	0.0505364	-2.76513	transcriptional regulator ChbR
C_RS00740	13.7921	0.0482795	-2.76168	ABC transporter permease
C_RS04770	16.3168	0.018922	-2.75959	L-lysine exporter LysO
C_RS06080	9.06931	0.0707729	-2.75712	glyoxylate/hydroxypyruvate reductase GhrA
C_RS07550	1.29703	0.516632	-2.75709	hypothetical protein
C_RS09760	5.55446	0.244915	-2.7546	4Fe-4S dicluster domain-containing protein
C_RS02105	10.4752	0.0867343	-2.7529	2-methylcitrate synthase
C_RS25225	1.27723	0.488632	-2.74594	2-iminobutanoate/2-iminopropanoate deaminase
C_RS20860	4.22772	0.272908	-2.73973	DUF3302 domain-containing protein
C_RS12040	10.2079	0.0503231	-2.7347	DNA gyrase inhibitor SbmC
C_RS03450	2.41584	0.204156	-2.73373	apolipoprotein N-acyltransferase
C_RS11465	7.58416	0.190033	-2.73196	DgsA anti-repressor MtfA
C_RS03200	5.0198	0.097129	-2.73145	YbdD/YjiX family protein
C_RS02960	0.0693069	0.966771	-2.73046	peptidylprolyl isomerase B
C_RS22590	0.138614	0.657043	-2.7294	ubiquinone biosynthesis protein UbiJ
C_RS29565	0.0693069	0.966771	-2.72764	hypothetical protein
C_RS24995	0.0693069	0.966771	-2.72744	30S ribosomal protein S18
C_RS00985	1	0.62787	-2.71461	outer membrane protein assembly factor BamA
C_RS07820	0.871287	0.664729	-2.70754	type I toxin-antitoxin system toxin Ldr family protein
C_RS03375	1.27723	0.598054	-2.70602	peptidoglycan DD-transpeptidase MrdA
C_RS21660	4.45545	0.437906	-2.70297	hypothetical protein
C_RS03055	6.91089	0.321378	-2.6955	Cu(+)/Ag(+) efflux RND transporter periplasmic adaptor subunit CusB
C_RS04970	1.12871	0.564078	-2.69188	tetraacyldisaccharide 4'-kinase
C_RS13280	6.9703	0.305021	-2.69029	4-deoxy-4-formamido-L-arabinose- phosphoundecaprenol deformylase
C_RS23830	12.8416	0.288379	-2.68939	aromatic amino acid transaminase
C_RS05715	5.08911	0.212236	-2.68837	hypothetical protein
C_RS00650	5.90099	0.147544	-2.68716	bacteriocin immunity protein
C_RS08100	7.17822	0.0583606	-2.68246	threonylcarbamoyl-AMP synthase
C_RS07235	0.811881	0.79405	-2.67187	helix-turn-helix transcriptional regulator
C_RS03360	9.9901	0.0402046	-2.67045	D-alanyl-D-alanine carboxypeptidase DacA
C_RS18430	3.88119	0.265018	-2.6674	type II toxin-antitoxin system antitoxin PrlF
C_RS12090	7.67327	0.203898	-2.66572	histidinol-phosphate transaminase
C_RS24880	4.92079	0.404527	-2.66478	23S rRNA (guanosine(2251)-2'-O)-methyltransferase RlmB
C_RS09830	1.0198	0.511859	-2.66442	YdiH family protein
C_RS02100	8.9505	0.118977	-2.66258	methylisocitrate lyase
C_RS04805	3.91089	0.136281	-2.6565	cold shock-like protein CspD
C_RS22725	0.871287	0.616181	-2.65264	hypothetical protein
C_RS11265	11.099	0.00871778	-2.65138	DNA-cytosine methyltransferase
C_RS07675	8.41584	0.0482128	-2.64924	muramoyltetrapeptide carboxypeptidase
C_RS15560	8.22772	0.23614	-2.64809	type II toxin-antitoxin system HigB family toxin
C_RS15620	3.90099	0.428403	-2.64715	hydrogenase maturation nickel metallochaperone HypA
C_RS16200	1.13861	0.538409	-2.64398	exodeoxyribonuclease V subunit beta
C_RS20815	8.56436	0.0528188	-2.64351	L-ribulose-5-phosphate 3-epimerase
C_RS23030	4.29703	0.396257	-2.63291	DUF805 domain-containing protein
C_RS14535	12.2277	0.115477	-2.62296	3-phenylpropionate MFS transporter
C_RS00455	2.67327	0.52108	-2.61443	division/cell wall cluster transcriptional repressor MraZ
C_RS14585	13.6931	0.048326	-2.61422	NO-inducible flavohemoprotein
C_RS11270	3.0198	0.306216	-2.61387	phosphohydrolase
C_RS08615	5.0495	0.406121	-2.61319	phosphatidate cytidylyltransferase
C_RS09175	8.90099	0.0664119	-2.60723	NAAT family transporter MarC
C_RS20040	2.78218	0.524139	-2.60644	YrhB family protein
C_RS03630	6.27723	0.0708806	-2.60635	LexA regulated protein
C_RS04600	2.16832	0.46818	-2.60257	phage tail assembly protein
C_RS07585	1.0198	0.638855	-2.60014	cell division topological specificity factor MinE
C_RS14190	2.0297	0.394271	-2.59255	ethanolamine utilization microcompartment protein EutS
C_RS09310	6.94059	0.246742	-2.59105	YnfC family lipoprotein
C_RS13595	10.9901	0.0570827	-2.58956	MFS transporter
C_RS15090	4.38614	0.390977	-2.58785	terminase small subunit
C_RS08490	9.75248	0.208812	-2.58564	helix-turn-helix transcriptional regulator
C_RS26475	4.56436	0.149494	-2.5844	tagatose-bisphosphate aldolase subunit KbaY
C_RS24275	10.7624	0.440932	-2.58079	two-component system response regulator DcuR
C_RS06585	3.35644	0.385675	-2.58037	hypothetical protein
C_RS09245	15.7129	0.0066948	-2.57599	diguanylate cyclase DgcZ
C_RS02810	9.16832	0.11256	-2.57584	SPFH/Band 7/PHB domain protein
C_RS21295	4.9901	0.206594	-2.57546	transposase domain-containing protein
C_RS02900	8.82178	0.144625	-2.57438	glycerate 3-kinase
C_RS23535	3.76238	0.129591	-2.57291	hypothetical protein
C_RS27760	1.9703	0.401444	-2.56811	hypothetical protein
C_RS13660	7.57426	0.0270248	-2.56735	fimbrial protein
C_RS05380	3.68317	0.281693	-2.56673	pyrimidine utilization flavin reductase protein F
C_RS04240	6.37624	0.114175	-2.56279	DNA starvation/stationary phase protection protein Dps
C_RS02695	3.90099	0.293585	-2.56185	primosomal replication protein N''
C_RS23755	4.38614	0.499681	-2.56023	CsbD family protein
C_RS03430	12.4158	0.043307	-2.56017	glutamate/aspartate ABC transporter permease GltK
C_RS21510	2.14851	0.544331	-2.55297	hypothetical protein
C_RS06830	8.67327	0.296082	-2.55125	phage tail protein
C_RS25595	7.80198	0.35666	-2.54741	DUF445 domain-containing protein
C_RS00935	0.465347	0.158669	-2.54197	bifunctional uridylyltransferase/uridylyl-removing protein GlnD
C_RS14290	10	0.0268157	-2.53926	glycine cleavage system transcriptional repressor
C_RS23940	4.93069	0.543398	-2.53887	CidA/LrgA family protein
C_RS23955	5.61386	0.281838	-2.53779	DUF485 domain-containing protein
C_RS24355	2.10891	0.526198	-2.53556	DUF957 domain-containing protein
C_RS07835	5.68317	0.104037	-2.53084	glutathione-specific gamma-glutamylcyclotransferase
C_RS02535	6.11881	0.289475	-2.52978	trigger factor
C_RS16985	2.08911	0.50635	-2.52271	IS66 family transposase
C_RS06960	4.10891	0.357677	-2.51891	hypothetical protein
C_RS25165	10.703	0.0975332	-2.51757	class 1 fructose-bisphosphatase
C_RS25540	6.19802	0.481485	-2.51668	hypochlorite stress DNA-binding transcriptional regulator HypT
C_RS22690	6.30693	0.264318	-2.5107	molybdopterin-guanine dinucleotide biosynthesis protein B
C_RS24785	0.0594059	0.966771	-2.50557	small ribosomal subunit biogenesis GTPase RsgA
C_RS10135	10.0297	0.179253	-2.50527	succinylglutamate desuccinylase
C_RS21950	0.0594059	0.966771	-2.50523	bifunctional UDP-N-acetylglucosamine diphosphorylase/glucosamine-1-phosphate N-acetyltransferase GlmU
C_RS09210	7.44554	0.39352	-2.50459	PTS sugar transporter subunit IIC
C_RS09715	0.0594059	0.966771	-2.50452	riboflavin synthase
C_RS03800	0.653465	0.593531	-2.50437	succinate--CoA ligase subunit alpha
C_RS13155	0.0594059	0.966771	-2.50305	DNA topoisomerase (ATP-hydrolyzing) subunit A
C_RS07510	7.60396	0.212643	-2.49997	DNA-binding transcriptional repressor BluR
C_RS24730	5.23762	0.414103	-2.49776	quaternary ammonium compound efflux SMR transporter SugE
C_RS09920	18.0495	0.0219175	-2.49387	phosphoenolpyruvate synthase
C_RS02740	11.6535	0.151921	-2.49344	acetyl esterase
C_RS14420	2.9802	0.492195	-2.49151	ancillary SecYEG translocon subunit YfgM
C_RS24720	0.554455	0.776471	-2.48888	lipoprotein antitoxin entericidin A
C_RS16615	16.6931	0.0217959	-2.48534	LysR family transcriptional regulator
C_RS15265	9.33663	0.19901	-2.48479	4-aminobutyrate--2-oxoglutarate transaminase
C_RS18895	13.9307	0.0380678	-2.48292	cell division protein ZapE
C_RS10235	2.63366	0.279917	-2.47733	hypothetical protein
C_RS02645	7.47525	0.168583	-2.47468	YlaC family protein
C_RS08915	8.72277	0.168925	-2.4735	nitrate reductase molybdenum cofactor assembly chaperone
C_RS20980	1.0099	0.653634	-2.46785	ADP-heptose--LPS heptosyltransferase RfaF
C_RS29625	4.18812	0.353695	-2.46403	hypothetical protein
C_RS21515	5.53465	0.0960087	-2.45996	50S ribosome-binding GTPase
C_RS03770	2.61386	0.335748	-2.45757	succinate dehydrogenase flavoprotein subunit
C_RS10915	11.198	0.0225633	-2.4573	flagellar motor stator protein MotA
C_RS21130	10.1485	0.257817	-2.45307	ATP-dependent DNA helicase RecG
C_RS04305	7.61386	0.190048	-2.45279	molybdopterin-synthase adenylyltransferase MoeB
C_RS26585	1.24752	0.49662	-2.44198	hypothetical protein
C_RS17810	9.89109	0.0169002	-2.44077	FCD domain-containing protein
C_RS15840	14.1287	0.14597	-2.44069	MFS transporter
C_RS14430	0.108911	0.647596	-2.43623	flavodoxin-dependent (E)-4-hydroxy-3-methylbut-2-enyl-diphosphate synthase
C_RS00370	5.13861	0.249202	-2.43574	DedA family protein
C_RS05980	5.77228	0.369455	-2.43574	GTPase family protein
C_RS18045	2.21782	0.561211	-2.4337	cell surface composition regulator GlgS
C_RS24410	6.61386	0.387226	-2.43224	50S ribosome-binding GTPase
C_RS14540	7.94059	0.247436	-2.4306	DoxX family protein
C_RS03105	5.19802	0.336754	-2.42885	type I toxin-antitoxin system toxin HokE
C_RS07715	11.1089	0.126516	-2.42483	iron ABC transporter permease
C_RS14115	5.53465	0.177997	-2.42161	ethanolamine utilization microcompartment protein EutK
C_RS00185	14.297	0.00819476	-2.41422	glutamine-hydrolyzing carbamoyl-phosphate synthase small subunit
C_RS24100	3.49505	0.528124	-2.4113	bifunctional allose-6-phosphate isomerase/ribose-5-phosphate isomerase RpiB
C_RS11390	3.62376	0.367681	-2.40837	DUF4755 domain-containing protein
C_RS14445	0.366337	0.582596	-2.39865	nucleoside-diphosphate kinase
C_RS23620	1.28713	0.661831	-2.39631	PTS sorbose IIA component
C_RS14170	8.21782	0.0425578	-2.39626	phosphate acetyltransferase
C_RS16630	10.0792	0.350485	-2.38709	small-conductance mechanosensitive channel MscS
C_RS18095	7.09901	0.405095	-2.3834	SH3 domain-containing protein
C_RS06925	17.7129	0.121454	-2.37992	peptidase T
C_RS04410	5.61386	0.199103	-2.37942	hypothetical protein
C_RS23765	13.5941	0.215671	-2.37816	tRNA dihydrouridine(20/20a) synthase DusA
C_RS10930	6.0396	0.447164	-2.37777	universal stress protein UspC
C_RS12835	1.10891	0.598297	-2.37529	YkgJ family cysteine cluster protein
C_RS05335	6.23762	0.166914	-2.36826	molecular chaperone TorD
C_RS17195	10.7525	0.023019	-2.36783	hypothetical protein
C_RS01920	5.10891	0.397828	-2.36721	helix-turn-helix domain-containing protein
C_RS28775	4.28713	0.449235	-2.36449	fructose-bisphosphatase class II
C_RS07890	12.9901	0.0879797	-2.36383	ketoacyl-ACP synthase III
C_RS00810	6.62376	0.228255	-2.36314	fimbrial protein
C_RS25825	11.3366	0.0460478	-2.36257	thymidine phosphorylase
C_RS17090	3.25743	0.507273	-2.36164	DUF1471 domain-containing protein
C_RS12230	6.91089	0.202488	-2.36015	GDP-L-fucose synthase
C_RS03425	3.57426	0.401479	-2.35191	glutamate/aspartate ABC transporter ATP binding protein GltL
C_RS10895	15.2178	0.110565	-2.35111	methyl-accepting chemotaxis protein II
C_RS12825	9.54455	0.042217	-2.34845	fused PTS fructose transporter subunit IIA/HPr protein
C_RS14295	4.40594	0.220205	-2.34805	thioredoxin-dependent thiol peroxidase
C_RS01930	7.41584	0.0832531	-2.3477	reactive chlorine species resistance protein RclC
C_RS10415	4.06931	0.237654	-2.34428	GlsB/YeaQ/YmgE family stress response membrane protein
C_RS15710	18.0198	0.0195598	-2.34162	RNA polymerase sigma factor RpoS
C_RS21175	0.940594	0.598754	-2.34012	PTS fructose transporter subunit IIB
C_RS18905	17.3168	0.0646356	-2.33688	serine endoprotease DegQ
C_RS07115	7	0.219237	-2.33543	hypothetical protein
C_RS16000	3.9901	0.471395	-2.33354	L-fucose mutarotase
C_RS18400	0.346535	0.54859	-2.3327	DNA-binding transcriptional activator TdcR
C_RS19820	1.9901	0.329226	-2.33221	[Fe-S]-dependent transcriptional repressor FeoC
C_RS10630	2.9802	0.360926	-2.33027	DUF1480 family protein
C_RS06800	3.32673	0.337117	-2.32337	head decoration protein
C_RS05635	7.88119	0.315445	-2.32118	1-acyl-sn-glycerol-3-phosphate acyltransferase
C_RS20315	21.2574	0.163021	-2.31962	oligopeptidase A
C_RS06230	3.58416	0.236163	-2.30895	biofilm formation regulator BssS
C_RS07535	1.0198	0.561711	-2.3038	hypothetical protein
C_RS12685	8.28713	0.13561	-2.30087	cytidine deaminase
C_RS20055	5.48515	0.228803	-2.29968	glycerophosphodiester phosphodiesterase
C_RS01555	4.79208	0.176059	-2.299	PTS sugar transporter subunit IIB
C_RS22990	5.37624	0.240224	-2.29365	envelope stress response regulator transcriptionfactor CpxR
C_RS06455	5.9901	0.331893	-2.28986	penicillin-binding protein activator LpoB
C_RS08070	6.28713	0.385341	-2.28142	tryptophan synthase subunit alpha
C_RS08130	13.0891	0.284549	-2.28038	protease SohB
C_RS05495	8.07921	0.120366	-2.27975	AlpA family transcriptional regulator
C_RS23410	1.05941	0.32063	-2.27894	DNA-directed RNA polymerase subunit beta'
C_RS04655	9.70297	0.189012	-2.27624	30S ribosomal protein S6--L-glutamate ligase
C_RS10420	3.07921	0.250653	-2.26886	DUF1869 domain-containing protein
C_RS20490	11.7426	0.0416728	-2.26736	cyclic-guanylate-specific phosphodiesterase
C_RS15345	8.49505	0.137214	-2.26323	class 1b ribonucleoside-diphosphate reductase subunit beta
C_RS13045	4.75248	0.418753	-2.25894	serine protease inhibitor ecotin
C_RS24110	3.92079	0.45175	-2.25732	phosphonate metabolism protein PhnP
C_RS09385	1.34653	0.526809	-2.25591	multidrug/spermidine efflux SMR transporter subunit MdtI
C_RS09335	12.4356	0.0506784	-2.25517	dimethyl sulfoxide reductase anchor subunit
C_RS09540	9.9901	0.54254	-2.25466	electron transport complex subunit RsxC
C_RS07295	3.91089	0.206355	-2.25048	crossover junction endodeoxyribonuclease RusA
C_RS00525	0.29703	0.255778	-2.2486	cell division protein FtsZ
C_RS20960	9.90099	0.292758	-2.24812	UDP-glucuronate:LPS(HepIII) glycosyltransferase
C_RS15405	5.74257	0.220163	-2.24386	S-ribosylhomocysteine lyase
C_RS02295	3.64356	0.265913	-2.24201	protein YaiA
C_RS16325	8.52475	0.305064	-2.24136	2-dehydro-3-deoxy-D-gluconate 5-dehydrogenase KduD
C_RS23540	4.39604	0.321758	-2.23691	acetyltransferase
C_RS16760	4.09901	0.545727	-2.23562	SprT family zinc-dependent metalloprotease
C_RS02035	3.41584	0.484353	-2.23256	DUF1097 domain-containing protein
C_RS22355	0.762376	0.363143	-2.22977	tyrosine recombinase XerC
C_RS07090	1.35644	0.527994	-2.2275	hypothetical protein
C_RS03020	10.7129	0.313134	-2.22725	DUF4434 family protein
C_RS11250	13.4554	0.253515	-2.22571	DUF808 domain-containing protein
C_RS21850	21.1683	0.0256718	-2.22565	low affinity tryptophan permease TnaB
C_RS19460	2.22772	0.335237	-2.22563	bacterioferritin-associated ferredoxin
C_RS21010	1.48515	0.496768	-2.22442	LPS 1,2-glucosyltransferase
C_RS02835	5.80198	0.297734	-2.2225	multifunctional acyl-CoA thioesterase I/proteaseI/lysophospholipase L1
C_RS02520	6.42574	0.326425	-2.22152	lipoprotein
C_RS17450	4.34653	0.107352	-2.22047	DUF957 domain-containing protein
C_RS28745	0.544554	0.589474	-2.2126	protein YpfM
C_RS10850	0.732673	0.966771	-2.2109	arginine--tRNA ligase
C_RS19655	17.0297	0.0280449	-2.21011	phosphopentomutase
C_RS29770	6.30693	0.114616	-2.20933	type IV toxin-antitoxin system YeeU family antitoxin
C_RS07575	1.0396	0.428527	-2.20394	hypothetical protein
C_RS20680	1.0099	0.426902	-2.20186	type I toxin-antitoxin system toxin HokA
C_RS01505	1.17822	0.454357	-2.2	hypothetical protein
C_RS05105	21.7723	0.0436474	-2.19821	bifunctional 23S rRNA (guanine(2069)-N(7))-methyltransferase RlmK/23S rRNA (guanine(2445)-N(2))-methyltransferase RlmL
C_RS00535	0.891089	0.818536	-2.19535	secA regulator SecM
C_RS29440	2.9802	0.601666	-2.19337	transposase
C_RS04505	7.73267	0.0791622	-2.187	phage major capsid protein, P2 family
C_RS18495	14.2871	0.0509931	-2.18583	PTS N-acetylgalactosamine transporter subunit IID
C_RS12615	7.80198	0.108183	-2.18557	glycine betaine ABC transporter ATP binding protein YehX
C_RS10785	0.0891089	0.641373	-2.18488	crossover junction endodeoxyribonuclease RuvC
C_RS18610	0.287129	0.600871	-2.18419	30S ribosome-binding factor RbfA
C_RS21020	0.792079	0.538375	-2.18281	lipopolysaccharide core heptose(I) kinase RfaP
C_RS11045	5.87129	0.237515	-2.18219	L-cystine ABC transporter ATP-binding protein YecC
C_RS16785	0.920792	0.643943	-2.18179	Holliday junction resolvase RuvX
C_RS05530	4.42574	0.496762	-2.18147	class II D-tagatose-bisphosphate aldolase, non-catalytic subunit
C_RS10560	4.50495	0.116446	-2.18012	YobF family protein
C_RS18375	33.8416	0.0279233	-2.17982	2-ketobutyrate formate-lyase/pyruvate formate-lyase
C_RS03280	3.77228	0.336281	-2.17713	citrate (pro-3S)-lyase subunit beta
C_RS18345	8.24752	0.298061	-2.17109	pirin family protein
C_RS00865	10.198	0.130253	-2.17087	Fe(3+)-hydroxamate ABC transporter substrate-binding protein FhuD
C_RS15040	6.58416	0.236524	-2.16901	tail protein
C_RS15910	12.505	0.0993863	-2.16591	glucarate dehydratase
C_RS11710	2.38614	0.404256	-2.16529	colibactin biosynthesis LuxR family transcriptional regulator ClbR
C_RS18075	14.495	0.0578282	-2.16386	inorganic triphosphatase
C_RS15810	8.60396	0.39525	-2.16089	glycerol-3-phosphate responsive antiterminator
C_RS20935	2.91089	0.472274	-2.16088	glutaredoxin 3
C_RS01680	4.59406	0.426233	-2.16017	IS630 family transposase
C_RS20070	11.9406	0.0418127	-2.15907	sn-glycerol-3-phosphate ABC transporter permeaseUgpA
C_RS04470	3.78218	0.415764	-2.15509	DinI family protein
C_RS12690	6.66337	0.482355	-2.15494	outer membrane permeability protein SanA
C_RS18015	6.09901	0.371061	-2.15308	fimbrial-like protein
C_RS14180	4.69307	0.26208	-2.14976	ethanolamine utilization acetate kinase EutQ
C_RS08710	8.38614	0.117818	-2.1492	tellurite resistance methyltransferase TehB
C_RS06810	4.17822	0.272489	-2.1491	hypothetical protein
C_RS11480	16.6634	0.043239	-2.14797	yersiniabactin biosynthesis salicylate synthase YbtS
C_RS04010	8.92079	0.354941	-2.14594	4-oxalomesaconate tautomerase
C_RS07200	2.50495	0.238719	-2.14593	Restriction inhibitor protein ral
C_RS17855	1.05941	0.705735	-2.14488	DNA topoisomerase IV subunit A
C_RS17435	4.42574	0.277357	-2.14472	type IV toxin-antitoxin system YeeU family antitoxin
C_RS05065	4.05941	0.466613	-2.14345	aliphatic sulfonates ABC transporter ATP-bindingprotein
C_RS11275	4.47525	0.239362	-2.14323	hypothetical protein
C_RS18455	8.54455	0.169419	-2.14315	PTS mannose/fructose/sorbose/N-acetylgalactosamine transporter subunit IIC
C_RS05580	7.45545	0.129939	-2.14288	beta-ketoacyl-[acyl-carrier-protein] synthase family protein
C_RS04160	9.38614	0.207179	-2.14024	ATP-dependent RNA helicase RhlE
C_RS13450	5.53465	0.363945	-2.13881	hexitol phosphatase HpxA
C_RS24855	6.60396	0.507685	-2.13803	protease modulator HflC
C_RS11205	6.29703	0.453511	-2.13794	flagellar type III secretion system pore proteinFliP
C_RS12985	1.0396	0.607916	-2.13675	heme exporter protein CcmD
C_RS15870	10.8614	0.40535	-2.12836	YgcG family protein
C_RS14965	3.75248	0.152173	-2.12744	hypothetical protein
C_RS14920	6.77228	0.0282922	-2.1267	outer membrane protein assembly factor BamE
C_RS15275	7.60396	0.0896225	-2.12087	DNA-binding transcriptional regulator CsiR
C_RS23650	9.59406	0.0320117	-2.12085	glucose-6-phosphate isomerase
C_RS13590	15.495	0.082876	-2.11689	flagella biosynthesis regulator Flk
C_RS17225	8.72277	0.294564	-2.11325	N(6)-hydroxylysine O-acetyltransferase
C_RS28240	10.6139	0.348722	-2.113	hypothetical protein
C_RS08185	7.43564	0.228135	-2.11233	phosphatidylglycerophosphatase B
C_RS25100	4.76238	0.414013	-2.10867	DUF1107 domain-containing protein
C_RS08910	8.87129	0.365952	-2.10856	respiratory nitrate reductase subunit gamma
C_RS10215	6.24752	0.0968404	-2.1081	YnjH family protein
C_RS09075	2.34653	0.356182	-2.1077	type 1 fimbrial protein
C_RS06720	1.75248	0.470137	-2.10641	class II holin family protein
C_RS22490	6.25743	0.367139	-2.10128	MurR/RpiR family transcriptional regulator
C_RS29245	7.9505	0.0873935	-2.10004	acetylxylan esterase
C_RS12275	4.30693	0.458212	-2.0993	low molecular weight protein-tyrosine-phosphatase Wzb
C_RS08950	9.9901	0.117784	-2.09637	formate dehydrogenase N subunit beta
C_RS20410	0.841584	0.424206	-2.09035	acid-activated periplasmic chaperone HdeA
C_RS19735	38.2277	0.0112353	-2.08791	peptidoglycan glycosyltransferase/peptidoglycan DD-transpeptidase MrcA
C_RS09600	11.9505	0.0333455	-2.08716	anhydro-N-acetylmuramic acid kinase
C_RS11225	2.59406	0.430225	-2.08634	protein DsrB
C_RS00025	11.7624	0.0177902	-2.08022	threonine synthase
C_RS12485	1.71287	0.446921	-2.07961	Ni(II)/Co(II)-binding transcriptional repressor RcnR
C_RS03995	13.5347	0.121994	-2.07575	bifunctional pyridoxal phosphate/fructose-1,6-bisphosphate phosphatase
C_RS21275	2.73267	0.480511	-2.07205	alcohol dehydrogenase catalytic domain-containing protein
C_RS03815	0.168317	0.248028	-2.06989	cytochrome ubiquinol oxidase subunit I
C_RS12570	7.63366	0.243132	-2.06793	VWA domain-containing protein
C_RS08115	8.74257	0.0818185	-2.06757	cob(I)yrinic acid a,c-diamide adenosyltransferase
C_RS14515	6.9505	0.502164	-2.06432	tRNA (cytosine(32)/uridine(32)-2'-O)-methyltransferase TrmJ
C_RS05945	15.802	0.420212	-2.06247	GTP-binding protein
C_RS21640	14.5644	0.169491	-2.06243	MFS transporter family glucose-6-phosphate receptor UhpC
C_RS17385	3.71287	0.366859	-2.05683	IS66 family insertion sequence element accessoryprotein TnpB
C_RS02260	3.17822	0.339733	-2.05619	anti-adapter protein IraP
C_RS13130	9.08911	0.373147	-2.05438	YfaP family protein
C_RS17660	6.94059	0.472277	-2.05321	thymidylate kinase
C_RS07980	10.0891	0.0952893	-2.05233	NAAT family transporter YchE
C_RS03065	17.3861	0.14875	-2.04972	phenylalanine transporter
C_RS18865	10.5149	0.137539	-2.04915	N-acetylneuraminate lyase
C_RS21300	21.9505	0.172394	-2.04563	nucleotidyltransferase
C_RS08015	13.7822	0.255776	-2.03713	cardiolipin synthase
C_RS17495	20.7723	0.00882759	-2.03684	capsular polysaccharide biosynthesis protein
C_RS16420	13.4059	0.137448	-2.03513	putative aminohydrolase SsnA
C_RS29845	3.52475	0.491752	-2.03024	2,3-diketo-L-gulonate TRAP transporter small permease YiaM
C_RS10940	10.5149	0.0390596	-2.02921	trehalose-phosphatase
C_RS11095	3.71287	0.339967	-2.02862	flagella biosynthesis regulatory protein FliT
C_RS01275	6.52475	0.0594588	-2.02709	type IV toxin-antitoxin system YeeU family antitoxin
C_RS27595	4.05941	0.467442	-2.02663	hemolysin expression modulator Hha
C_RS17725	4.46535	0.331316	-2.02501	DUF2623 domain-containing protein
C_RS15495	9.91089	0.41574	-2.02369	PTS glucitol/sorbitol transporter subunit IIB
C_RS00640	1.68317	0.481073	-2.02256	bacteriocin immunity protein
C_RS25335	7.68317	0.435307	-2.02216	gluconate 5-dehydrogenase
C_RS07920	11.5842	0.367739	-2.01786	acyl-CoA desaturase
C_RS24970	10.6733	0.196521	-2.01769	L-ribulose-5-phosphate 4-epimerase UlaF
C_RS16595	0.524752	0.966771	-2.01399	ribose-5-phosphate isomerase RpiA
C_RS24930	8.89109	0.190399	-2.01046	esterase
C_RS11805	5.58416	0.110671	-2.01021	bifunctional hydroxymethylpyrimidine kinase/phosphomethylpyrimidine kinase
C_RS07520	1.63366	0.423394	-2.00998	two-component-system connector protein YcgZ
C_RS12490	11.9505	0.114835	-2.00964	nickel/cobalt efflux protein RcnA
C_RS00100	25.7921	0.0257619	-2.005	sulfatase-like hydrolase/transferase
C_RS18405	13.6535	0.0708362	-2.00431	glycerate 2-kinase
C_RS06315	6.05941	0.311281	-1.99913	flagellar basal-body rod protein FlgF
C_RS02050	8.05941	0.498117	-1.99863	acyl-CoA synthetase FdrA
C_RS18005	9.0396	0.201818	-1.99764	zinc transporter ZupT
C_RS21995	3.64356	0.488296	-1.99759	F0F1 ATP synthase subunit I
C_RS07605	7.80198	0.222013	-1.99742	PPC domain-containing protein
C_RS18485	4.19802	0.437403	-1.99612	PTS N-acetylgalactosamine transporter subunit IIB
C_RS23445	10.1485	0.154527	-1.99484	sigma D regulator
C_RS22940	19.0099	0.163052	-1.99432	rhamnulokinase
C_RS06060	3.10891	0.389403	-1.99357	DUF957 domain-containing protein
C_RS04355	5.0198	0.435504	-1.9934	biofilm formation regulator BssR
C_RS19710	13.1485	0.188417	-1.99288	DNA uptake porin HofQ
C_RS14860	19.7723	0.0284384	-1.99261	diguanylate cyclase DgcN
C_RS24185	4.88119	0.204096	-1.99073	phnA family protein
C_RS18570	12.7327	0.0205726	-1.99018	luciferase-like monooxygenase
C_RS21945	0.366337	0.374485	-1.98824	glutamine--fructose-6-phosphate transaminase (isomerizing)
C_RS03085	2.67327	0.375236	-1.98743	DUF1158 domain-containing protein
C_RS07350	7.29703	0.256037	-1.98687	terminase small subunit
C_RS16170	4.27723	0.367658	-1.9847	putative C-S lyase
C_RS23905	2.38614	0.453862	-1.98336	YjcB family protein
C_RS17685	4.79208	0.215135	-1.9832	hydrogenase maturation nickel metallochaperone HypA
C_RS24240	11.1683	0.292266	-1.98256	transcriptional regulator MelR
C_RS09835	4.82178	0.221259	-1.98177	1,4-dihydroxy-2-naphthoyl-CoA hydrolase
C_RS08605	11.3762	0.00616476	-1.98033	pyridoxine 4-dehydrogenase
C_RS06100	10.3366	0.229846	-1.97829	curli production assembly/transport protein CsgG
C_RS23690	10.6634	0.299439	-1.97791	maltose ABC transporter permease MalG
C_RS10180	4.51485	0.344691	-1.97763	carboxymuconolactone decarboxylase family protein
C_RS24615	20.5446	0.040478	-1.97751	phosphoadenosine phosphosulfate reductase
C_RS25940	4.61386	0.422943	-1.97724	hypothetical protein
C_RS04845	1.41584	0.615041	-1.97701	cysteine/glutathione ABC transporter permease/ATP-binding protein CydD
C_RS13360	3.73267	0.574418	-1.97686	YfbM family protein
C_RS05870	16.2079	0.10929	-1.97543	catecholate siderophore esterase IroE
C_RS09140	16.9802	0.00883953	-1.97523	tagaturonate reductase
C_RS02500	2.33663	0.332938	-1.97416	cytochrome o ubiquinol oxidase subunit III
C_RS08010	1.87129	0.508484	-1.97165	YciU family protein
C_RS18515	4.10891	0.342975	-1.96834	YraN family protein
C_RS19535	9.68317	0.222149	-1.96748	glutathione-regulated potassium-efflux system ancillary protein KefG
C_RS25780	18.6238	0.0512068	-1.96422	peptide chain release factor 3
C_RS02410	8.79208	0.135129	-1.964	DUF3251 domain-containing protein
C_RS00715	23.0693	0.0594778	-1.96264	multicopper oxidase CueO
C_RS17680	7.06931	0.148366	-1.96235	hydrogenase maturation factor HybG
C_RS06815	1.14851	0.56925	-1.96085	tail attachment protein
C_RS11120	7.51485	0.372431	-1.95727	SOS response-associated peptidase
C_RS02240	11.1089	0.185251	-1.95633	surface-exposed outer membrane lipoprotein YaiW
C_RS11350	9.61386	0.142445	-1.95095	prepilin-type N-terminal cleavage/methylation domain-containing protein
C_RS25480	7.26733	0.209912	-1.94706	type 1 fimbria minor subunit FimF
C_RS25105	19	0.0225525	-1.94493	HlyC/CorC family transporter
C_RS19100	4.17822	0.388071	-1.94224	multidrug efflux transporter transcriptional repressor AcrS
C_RS06510	14.9406	0.367513	-1.94135	acyltransferase family protein
C_RS26275	3.40594	0.359458	-1.94036	hypothetical protein
C_RS19450	9.89109	0.401896	-1.93639	prepilin peptidase GspO
C_RS01530	9.21782	0.247732	-1.93591	ribokinase
C_RS16965	14.7426	0.336476	-1.93275	IS3 family transposase
C_RS15470	5.12871	0.463013	-1.93062	recombination regulator RecX
C_RS08715	8.68317	0.239345	-1.93049	DUF3313 domain-containing protein
C_RS06915	10.5149	0.127699	-1.92835	spermidine/putrescine ABC transporter ATP-binding protein PotA
C_RS11915	13.9505	0.202872	-1.92731	IS21-like element IS100 family transposase
C_RS01365	13.6535	0.0351428	-1.92547	tyrosine-type recombinase/integrase
C_RS09525	5.22772	0.323348	-1.92541	DUF2569 domain-containing protein
C_RS25430	13.0396	0.151576	-1.92324	N-acetylneuraminic acid outer membrane channel NanC
C_RS18490	10.0297	0.346544	-1.9211	PTS N-acetylgalactosamine transporter subunit IIC
C_RS02205	12.3564	0.153724	-1.92043	taurine dioxygenase
C_RS04045	9.07921	0.452365	-1.9173	biotin synthase BioB
C_RS21075	5.61386	0.503312	-1.91636	nucleoid occlusion factor SlmA
C_RS16800	8.49505	0.288143	-1.91514	osmotic shock tolerance protein YggT
C_RS18315	4.89109	0.257711	-1.91318	phage holin family protein
C_RS12480	5.36634	0.23515	-1.91285	hydroxyethylthiazole kinase
C_RS29840	4.61386	0.398936	-1.91221	GNAT family N-acetyltransferase
C_RS13490	9.54455	0.0796373	-1.91105	phosphodiesterase
C_RS22845	5.80198	0.246435	-1.91067	D-tyrosyl-tRNA(Tyr) deacylase
C_RS07610	4.52475	0.246743	-1.90833	YcgL domain-containing protein
C_RS13115	7.24752	0.121817	-1.90809	succinyl-CoA--3-ketoacid-CoA transferase
C_RS17485	22.4257	0.00133973	-1.90556	polysaccharide biosynthesis/export family protein
C_RS25065	7.67327	0.437937	-1.90501	iron-sulfur cluster repair protein YtfE
C_RS16445	17.9703	0.28036	-1.90436	guanine/hypoxanthine transporter GhxQ
C_RS13515	8.77228	0.246139	-1.90403	histidine ABC transporter ATP-binding protein HisP
C_RS14780	18.495	0.11355	-1.89811	alpha-ketoglutarate permease
C_RS09485	5.49505	0.311914	-1.89544	7-alpha-hydroxysteroid dehydrogenase
C_RS11425	4.28713	0.313147	-1.88767	H-NS histone family protein
C_RS05120	12.2871	0.414066	-1.88308	intermembrane transport protein PqiB
C_RS20465	7.0099	0.325778	-1.87778	response regulator transcription factor
C_RS03335	0.277228	0.66217	-1.87591	lipoyl synthase
C_RS03140	7.89109	0.324898	-1.87432	LPS O-antigen length regulator
C_RS20010	7.05941	0.292915	-1.87407	quercetin 2,3-dioxygenase
C_RS08625	22.9109	0.0530053	-1.87399	phosphatase PAP2/dual specificity phosphatase family protein
C_RS13615	7.15842	0.506651	-1.8732	elongation factor P hydroxylase
C_RS22435	12.1485	0.234055	-1.8728	sugar/pyridoxal phosphate phosphatase YigL
C_RS18190	4.17822	0.367109	-1.87155	tRNA-binding protein
C_RS26835	5.47525	0.120968	-1.867	tyrosine-type recombinase/integrase
C_RS29820	1.51485	0.450854	-1.8665	GntR family transcriptional regulator
C_RS12860	5.54455	0.450383	-1.86646	bifunctional murein DD-endopeptidase/murein LD-carboxypeptidase
C_RS04280	15.495	0.0604486	-1.86424	ABC-F family ATPase
C_RS18545	3.31683	0.264684	-1.86227	DNA damage response exodeoxyribonuclease YhbQ
C_RS21675	1.54455	0.529341	-1.86116	ilvB operon leader peptide IvbL
C_RS24750	5.42574	0.42964	-1.85517	fumarate reductase subunit FrdC
C_RS22630	1.37624	0.2309	-1.8538	NAD(P)H-flavin reductase
C_RS08665	4.72277	0.34848	-1.85351	methyl-accepting chemotaxis protein
C_RS03560	4.9802	0.422042	-1.85224	TerC family protein
C_RS13415	1.90099	0.327383	-1.84999	NADH-quinone oxidoreductase subunit C/D
C_RS01205	3.47525	0.451338	-1.84835	transposase
C_RS24895	8.38614	0.473324	-1.84808	YjfK family protein
C_RS22895	9.9604	0.321959	-1.84589	formate dehydrogenase O subunit beta
C_RS09480	8.77228	0.226645	-1.84573	DNA-binding transcriptional regulator UidR
C_RS01050	4.9505	0.134029	-1.84438	YaeP family protein
C_RS13010	3.91089	0.414467	-1.84438	nitrate reductase cytochrome c-type subunit
C_RS11495	12.5941	0.418811	-1.84392	yersiniabactin ABC transporter ATP-binding/permease protein YbtP
C_RS07660	13.6337	0.206345	-1.84297	D-amino acid dehydrogenase
C_RS24655	6.86139	0.448355	-1.84161	transcriptional regulator
C_RS29340	4.33663	0.109305	-1.83895	type I toxin-antitoxin system Ibs family toxin
C_RS05860	9.08911	0.381089	-1.83813	IS630-like element ISEc40 family transposase
C_RS21415	7.36634	0.260479	-1.83792	DJ-1/PfpI family protein
C_RS09150	4.38614	0.427119	-1.83636	DUF4186 domain-containing protein
C_RS04610	21.2277	0.107248	-1.83415	phage tail tape measure protein
C_RS14050	6.77228	0.18759	-1.83392	sulfate/thiosulfate ABC transporter permease CysW
C_RS12365	3.17822	0.450989	-1.83346	YegP family protein
C_RS18480	9.16832	0.0997969	-1.83296	tagatose-bisphosphate aldolase subunit KbaY
C_RS04640	6.23762	0.172816	-1.83204	glutaredoxin 1
C_RS22885	7.9901	0.439627	-1.83127	formate dehydrogenase accessory protein FdhE
C_RS24400	8.75248	0.344949	-1.8299	WYL domain-containing protein
C_RS17455	13.3762	0.194524	-1.82967	DUF4942 domain-containing protein
C_RS25485	6.9505	0.347128	-1.82798	type 1 fimbria minor subunit FimG
C_RS05730	10.0693	0.313945	-1.82731	3-deoxy-7-phosphoheptulonate synthase
C_RS04725	14.0594	0.0261677	-1.82468	lipoprotein
C_RS08670	16.099	0.0355187	-1.82393	LysR family transcriptional regulator
C_RS03700	9.50495	0.260561	-1.82357	YbgA family protein
C_RS03515	24.1188	0.0128112	-1.82349	asparagine synthase B
C_RS22800	8.65347	0.365282	-1.82249	sugar kinase
C_RS06860	6.71287	0.364157	-1.82136	phage tail protein
C_RS18080	5	0.369287	-1.81865	IS200/IS605-like element ISEc41 family transposase
C_RS18385	18.4257	0.101472	-1.81846	threonine/serine transporter TdcC
C_RS04575	16.2079	0.38003	-1.81745	phage tail protein
C_RS15635	12.6535	0.037955	-1.81571	hydrogenase formation protein HypD
C_RS15050	3.0198	0.434256	-1.81519	head-tail joining protein
C_RS08750	15.3069	0.211189	-1.8123	ABC transporter substrate-binding protein
C_RS23660	8.53465	0.180631	-1.80675	YjbF family lipoprotein
C_RS21900	16.3861	0.473845	-1.80461	carbohydrate-specific porin BglH
C_RS02375	9.09901	0.223985	-1.80357	tRNA preQ1(34) S-adenosylmethionine ribosyltransferase-isomerase QueA
C_RS12465	4.09901	0.373036	-1.80346	GntR family transcriptional regulator
C_RS13015	10.0495	0.239671	-1.80197	quinol dehydrogenase ferredoxin subunit NapH
C_RS28675	2.08911	0.477278	-1.80067	AlpA family phage regulatory protein
C_RS19730	11.5644	0.167276	-1.79795	DNA utilization protein HofM
C_RS22775	17.2772	0.0794345	-1.79793	ribosome-dependent GTPase TypA
C_RS04710	6.85149	0.200136	-1.79792	arginine ABC transporter permease ArtQ
C_RS13540	0.613861	0.966771	-1.79787	flavin prenyltransferase UbiX
C_RS24725	2.20792	0.576527	-1.79783	lipoprotein toxin entericidin B
C_RS22365	16.9307	0.0561954	-1.79722	DNA helicase II
C_RS17735	12.396	0.125024	-1.79639	L-glyceraldehyde 3-phosphate reductase
C_RS01775	3.68317	0.512595	-1.79509	sigma factor-binding protein Crl
C_RS07400	5.75248	0.402467	-1.79402	tail protein
C_RS09155	11.4257	0.0650871	-1.793	glutaminase B
C_RS16680	4.71287	0.311957	-1.79255	fumarase E
C_RS15820	6.59406	0.254079	-1.7924	electron transfer flavoprotein subunit beta/FixAfamily protein
C_RS16370	19.8119	0.0884415	-1.78915	sigma-54-dependent transcriptional regulator
C_RS22840	16.0495	0.121903	-1.78899	virulence factor BrkB family protein
C_RS24565	6.66337	0.278938	-1.78831	hypothetical protein
C_RS21870	7.86139	0.139868	-1.78794	class I chromate reductase YieF
C_RS03185	9.20792	0.189774	-1.78791	2,3-dihydro-2,3-dihydroxybenzoate dehydrogenase EntA
C_RS13460	4.70297	0.221104	-1.78759	DUF412 domain-containing protein
C_RS03230	13.1287	0.071318	-1.78685	thiol:disulfide interchange protein DsbG
C_RS14340	33.1881	0.00101573	-1.78675	polyphosphate kinase 1
C_RS02935	10.1683	0.352761	-1.78337	carbamate kinase
C_RS15915	20.1287	0.100751	-1.78294	glucarate dehydratase
C_RS23460	6.20792	0.310045	-1.78119	deoxyribonuclease V
C_RS07395	3.84158	0.306023	-1.77844	phage tail protein
C_RS10705	3.13861	0.317869	-1.77824	DNA damage-inducible protein YebG
C_RS06990	3.67327	0.446748	-1.77807	hypothetical protein
C_RS00090	2.92079	0.296635	-1.77778	type I toxin-antitoxin system toxin MokC
C_RS06540	12.0495	0.338201	-1.77745	TPM domain-containing protein
C_RS22475	5.78218	0.267267	-1.77718	SIS domain-containing protein
C_RS07215	2.13861	0.280384	-1.77556	hypothetical protein
C_RS04525	2.59406	0.313059	-1.77063	hypothetical protein
C_RS18870	8.40594	0.0724054	-1.7706	transcriptional regulator NanR
C_RS27875	1.59406	0.489772	-1.76983	hypothetical protein
C_RS16145	4.0396	0.423755	-1.76778	type VI secretion system lipoprotein TssJ
C_RS00260	6.35644	0.328001	-1.76423	glutathione-regulated potassium-efflux system oxidoreductase KefF
C_RS02850	11.297	0.0282456	-1.76185	tRNA 2-selenouridine(34) synthase MnmH
C_RS10585	7.31683	0.270839	-1.7589	DNA-binding transcriptional regulator KdgR
C_RS24680	8.0099	0.322492	-1.75448	membrane protein FxsA
C_RS18270	7.88119	0.321157	-1.75424	YgjV family protein
C_RS02715	0.752475	0.598591	-1.75424	YbaB/EbfC family nucleoid-associated protein
C_RS29745	2.07921	0.49788	-1.75305	hypothetical protein
C_RS05610	6.9505	0.25793	-1.75291	hypothetical protein
C_RS17530	3.42574	0.456914	-1.74941	ABC transporter ATP-binding protein
C_RS14345	11.6139	0.457206	-1.74872	exopolyphosphatase
C_RS20215	7.34653	0.284321	-1.74816	nickel import ATP-binding protein NikD
C_RS13525	9.59406	0.0610694	-1.74771	histidine ABC transporter permease HisQ
C_RS04490	18.6337	0.0501317	-1.74577	phage portal protein
C_RS00240	7.09901	0.253908	-1.74554	electron transfer flavoprotein subunit alpha/FixB family protein
C_RS18390	8.53465	0.502086	-1.74148	bifunctional threonine ammonia-lyase/L-serine ammonia-lyase TdcB
C_RS05345	7.56436	0.121748	-1.74048	curved DNA-binding protein
C_RS03110	10.703	0.170737	-1.74035	enterobactin synthase subunit EntD
C_RS11295	8.13861	0.398225	-1.73691	protein deglycase HchA
C_RS03930	10.703	0.138761	-1.73537	3-deoxy-7-phosphoheptulonate synthase AroG
C_RS24080	10.9802	0.487032	-1.73488	D-allose ABC transporter permease
C_RS07180	3.71287	0.42676	-1.73485	host-nuclease inhibitor protein Gam
C_RS13075	17.495	0.0310064	-1.73478	porin OmpC
C_RS12135	9.33663	0.128733	-1.73383	colanic acid biosynthesis phosphomannomutase CpsG
C_RS16725	12.5347	0.243569	-1.73331	hypothetical protein
C_RS21500	6.06931	0.207164	-1.73242	hypothetical protein
C_RS18715	5.08911	0.27281	-1.72873	DNA-binding transcriptional regulator SfsB
C_RS06335	12.0099	0.0440492	-1.72666	flagellar assembly peptidoglycan hydrolase FlgJ
C_RS20705	5.41584	0.150979	-1.72611	YiaB family inner membrane protein
C_RS21940	6.33663	0.4935	-1.72534	phosphate ABC transporter substrate-binding protein PstS
C_RS20100	13.9109	0.29303	-1.72291	high-affinity branched-chain amino acid ABC transporter permease LivH
C_RS09455	9.73267	0.128363	-1.7228	mannose-6-phosphate isomerase
C_RS15120	1.36634	0.600718	-1.72192	cold shock protein CspI
C_RS18935	33.8416	0.0136574	-1.71956	p-hydroxybenzoic acid efflux pump subunit AaeB
C_RS08945	40.297	0.0120179	-1.71234	formate dehydrogenase-N subunit alpha
C_RS09405	14.7624	0.252089	-1.71195	Re/Si-specific NAD(P)(+) transhydrogenase subunit alpha
C_RS03720	9.13861	0.137746	-1.71114	5-oxoprolinase subunit PxpB
C_RS24550	15.1188	0.0441597	-1.71065	hypothetical protein
C_RS05855	4.92079	0.420222	-1.71017	MarR family transcriptional regulator
C_RS01960	10.5842	0.228234	-1.70723	lactate utilization protein C
C_RS07010	15.0198	0.300386	-1.70475	major capsid protein
C_RS04275	9.87129	0.426109	-1.70448	L,D-transpeptidase
C_RS02565	4.86139	0.484242	-1.70232	helix-hairpin-helix domain-containing protein
C_RS10385	10.5743	0.293062	-1.70149	DNA-binding transcriptional regulator NimR
C_RS22780	5.62376	0.481539	-1.70009	UTRA domain-containing protein
C_RS10195	4.54455	0.337813	-1.6975	ATP-binding cassette domain-containing protein
C_RS20590	14.7525	0.225572	-1.69686	dipeptide ABC transporter ATP-binding protein
C_RS13355	6.47525	0.447444	-1.69586	M28 family peptidase
C_RS00075	6.11881	0.32239	-1.69538	DUF2541 family protein
C_RS12750	12.1089	0.322909	-1.69449	S-formylglutathione hydrolase
C_RS05480	16.2475	0.132089	-1.68755	tyrosine-type recombinase/integrase
C_RS01420	2.46535	0.375101	-1.68684	AlpA family transcriptional regulator
C_RS11855	5.08911	0.449198	-1.68657	inovirus Gp2 family protein
C_RS06470	10.3762	0.105877	-1.68531	alpha/beta hydrolase
C_RS11365	1.09901	0.579874	-1.68423	toll/interleukin-1 receptor domain-containing protein
C_RS06095	7.88119	0.302063	-1.68263	DUF1097 domain-containing protein
C_RS04680	16.4356	0.147179	-1.68037	putrescine ABC transporter permease PotH
C_RS22710	0.435644	0.534494	-1.67984	thiol:disulfide interchange protein DsbA
C_RS11750	6.91089	0.0533955	-1.67968	bifunctional adenosylcobinamide kinase/adenosylcobinamide-phosphate guanylyltransferase
C_RS02480	1.9802	0.518542	-1.67788	nucleotide binding protein YajQ
C_RS12510	1.9505	0.38365	-1.67778	fimbria/pilus periplasmic chaperone
C_RS11140	7.9505	0.273895	-1.67575	SMR family multidrug efflux protein EmrE
C_RS25110	8.9703	0.354435	-1.67514	peptide-methionine (S)-S-oxide reductase MsrA
C_RS19840	2.23762	0.534371	-1.67373	Fe-S biogenesis protein NfuA
C_RS21525	8.37624	0.287783	-1.67365	WYL domain-containing protein
C_RS15155	13.9901	0.0694542	-1.67142	antitermination protein
C_RS02720	3.52475	0.394765	-1.67128	recombination protein RecR
C_RS22715	16.2376	0.348063	-1.66375	YdgA family protein
C_RS13545	24.505	0.00630177	-1.66302	amidophosphoribosyltransferase
C_RS01430	3.33663	0.30734	-1.66128	hemolysin activation protein
C_RS14325	4.79208	0.412592	-1.66059	uracil phosphoribosyltransferase
C_RS27020	2.0495	0.530022	-1.65962	hypothetical protein
C_RS18540	2.0495	0.490642	-1.65837	YhbP family protein
C_RS21690	8.81188	0.2317	-1.65786	DUF202 domain-containing protein
C_RS25160	12.7921	0.14982	-1.6575	sugar ABC transporter permease YjfF
C_RS13820	5.9703	0.260057	-1.65561	YfdY family protein
C_RS13805	7.84158	0.110741	-1.64716	YfdX family protein
C_RS11105	3.0099	0.467051	-1.64153	lipoprotein
C_RS24955	5.9703	0.431058	-1.63684	PTS ascorbate transporter subunit IIA
C_RS22975	7.59406	0.436405	-1.63566	2-keto-3-deoxygluconate transporter
C_RS25360	12.8614	0.421324	-1.63274	integrase arm-type DNA-binding domain-containingprotein
C_RS07205	9.38614	0.183915	-1.63072	super-infection exclusion protein B
C_RS06590	2.47525	0.432008	-1.6297	hypothetical protein
C_RS04775	7.38614	0.4753	-1.62962	aquaporin Z
C_RS23600	13.0792	0.21246	-1.62833	zinc-binding dehydrogenase
C_RS10500	18.9406	0.133421	-1.62802	L-serine ammonia-lyase
C_RS12715	10.7228	0.241557	-1.62778	galactose/methyl galactoside ABC transporter ATP-binding protein MglA
C_RS21285	18.0099	0.350122	-1.62594	IS30-like element IS30 family transposase
C_RS06300	4.47525	0.442334	-1.62421	flagellar basal body rod protein FlgC
C_RS16040	8.58416	0.409304	-1.62057	tRNA cyclic N6-threonylcarbamoyladenosine(37) synthase TcdA
C_RS00285	7.69307	0.145185	-1.62029	bis(5'-nucleosyl)-tetraphosphatase (symmetrical)ApaH
C_RS08090	17.703	0.0451869	-1.61972	anthranilate synthase component I
C_RS07025	5.23762	0.439296	-1.61797	hypothetical protein
C_RS01560	7.67327	0.472525	-1.61583	PTS sugar transporter subunit IIA
C_RS29725	3.94059	0.278262	-1.61554	DUF957 domain-containing protein
C_RS24285	3.46535	0.479812	-1.6152	(4Fe-4S)-binding protein
C_RS23870	9.46535	0.298085	-1.61463	sigma-54-dependent Fis family transcriptional regulator
C_RS25180	15.4653	0.304473	-1.61331	metalloprotease PmbA
C_RS20210	11.4158	0.123551	-1.61305	nickel ABC transporter permease subunit NikC
C_RS08365	10.5248	0.150426	-1.61295	sugar phosphate isomerase/epimerase
C_RS07865	14.4455	0.1662	-1.61284	nitrate transporter NarK
C_RS06930	11.8119	0.261288	-1.61201	[50S ribosomal protein L16]-arginine 3-hydroxylase
C_RS12855	8.13861	0.240654	-1.60914	Kdo(2)-lipid A phosphotransferase
C_RS19415	7.34653	0.350026	-1.60895	type II secretion system major pseudopilin GspG
C_RS06965	1.36634	0.541043	-1.60875	hypothetical protein
C_RS12345	33.9703	0.00460352	-1.60769	multidrug efflux RND transporter permease subunit MdtC
C_RS12995	4.72277	0.333764	-1.60677	heme exporter protein CcmB
C_RS23665	6.47525	0.134133	-1.60668	capsule biosynthesis GfcC family protein
C_RS22810	10.2871	0.488701	-1.60292	aldolase
C_RS21430	10.8218	0.485947	-1.60287	hypothetical protein
C_RS23435	10.6832	0.225439	-1.60156	thiamine phosphate synthase
C_RS04645	2.0297	0.38084	-1.60073	DUF1418 family protein
C_RS18505	11.5941	0.418953	-1.60038	16S rRNA (cytidine(1402)-2'-O)-methyltransferase
C_RS21120	6.32673	0.274175	-1.60026	bifunctional GTP diphosphokinase/guanosine-3',5'-bis pyrophosphate 3'-pyrophosphohydrolase
C_RS03160	9.9604	0.455422	-1.59921	enterobactin transporter EntS
C_RS07965	16.5941	0.0654051	-1.59701	thymidine kinase
C_RS12590	10.9604	0.209175	-1.5964	two-component system response regulator BtsR
C_RS18205	4.24752	0.446287	-1.59442	beta-galactosidase subunit beta
C_RS16625	6.35644	0.325733	-1.59347	arginine exporter ArgO
C_RS23420	4.61386	0.334372	-1.59257	thiazole synthase
C_RS05915	11.2376	0.10532	-1.59233	IS4 family transposase
C_RS29055	4.09901	0.378351	-1.59184	DUF2754 domain-containing protein
C_RS08770	18.2277	0.267262	-1.59157	aminobutyraldehyde dehydrogenase
C_RS17475	10.495	0.0367145	-1.591	KpsF/GutQ family sugar-phosphate isomerase
C_RS23990	6.87129	0.366596	-1.59004	heme lyase NrfEFG subunit NrfF
C_RS07650	3.55446	0.386326	-1.58929	fatty acid metabolism transcriptional regulator FadR
C_RS10580	5.9703	0.402921	-1.58689	hypothetical protein
C_RS23875	6.9505	0.47259	-1.58617	sensor histidine kinase
C_RS08325	5.81188	0.179088	-1.58518	envelope stress response membrane protein PspC
C_RS16305	18.802	0.0540968	-1.585	diaminopimelate decarboxylase
C_RS07305	5.16832	0.416668	-1.58428	antitermination protein QuuD
C_RS13875	14.1683	0.0683354	-1.58313	glucokinase
C_RS02705	3.9604	0.486556	-1.58077	adenine phosphoribosyltransferase
C_RS12405	5.79208	0.454317	-1.57918	DeoR/GlpR transcriptional regulator
C_RS14545	10.2772	0.22828	-1.5773	aldose 1-epimerase
C_RS09765	8.64356	0.0551394	-1.57284	YdhW family putative oxidoreductase system protein
C_RS16390	18.8119	0.0415995	-1.5718	dihydropyrimidinase
C_RS01715	11.9703	0.0769031	-1.57152	class II glutamine amidotransferase
C_RS24115	2.40594	0.420085	-1.57147	aminoalkylphosphonate N-acetyltransferase
C_RS03250	4.58416	0.442045	-1.57041	nucleoside diphosphate kinase regulator
C_RS11970	10.6634	0.210683	-1.56974	patatin-like phospholipase family protein
C_RS18955	18.4455	0.120673	-1.56887	metalloprotease TldD
C_RS08425	5.62376	0.447531	-1.56657	murein tripeptide amidase MpaA
C_RS03920	2.87129	0.479037	-1.56649	YbgS-like family protein
C_RS04705	12.2574	0.156914	-1.56585	arginine ABC transporter permease ArtM
C_RS14565	10.5743	0.210252	-1.56526	substrate-binding domain-containing protein
C_RS06055	5.48515	0.264905	-1.56267	hypothetical protein
C_RS06900	12.6436	0.449256	-1.56216	class I SAM-dependent methyltransferase
C_RS22345	1.06931	0.72894	-1.55864	diaminopimelate epimerase
C_RS02160	6.45545	0.390796	-1.55806	S-(hydroxymethyl)glutathione dehydrogenase
C_RS22835	14.0495	0.254257	-1.55577	glucose-1-phosphatase
C_RS23750	16.4653	0.0855601	-1.55455	MATE family efflux transporter DinF
C_RS02345	6.90099	0.466285	-1.55374	phosphate response regulator transcription factor PhoB
C_RS01285	3.40594	0.507271	-1.55135	DUF987 domain-containing protein
C_RS17950	8.13861	0.266356	-1.55109	3',5'-cyclic-AMP phosphodiesterase
C_RS25275	9.9505	0.50453	-1.551	ornithine carbamoyltransferase
C_RS09610	5.47525	0.319243	-1.55043	transcriptional regulator SlyA
C_RS00775	8.88119	0.132623	-1.54708	3-methyl-2-oxobutanoate hydroxymethyltransferase
C_RS00895	7.06931	0.267276	-1.54631	vitamin B12 ABC transporter substrate-binding protein BtuF
C_RS23810	11.1386	0.432663	-1.54364	hypothetical protein
C_RS25460	6.86139	0.488876	-1.54221	fimbrial protein
C_RS14205	19.8911	0.0643492	-1.54077	transketolase
C_RS03650	23.495	0.153417	-1.53995	putrescine-ornithine antiporter
C_RS22350	8.66337	0.254286	-1.53878	DUF484 domain-containing protein
C_RS03245	7.66337	0.0718044	-1.53791	universal stress protein UspG
C_RS16365	4.48515	0.456672	-1.53764	xanthine dehydrogenase iron sulfur-binding subunit XdhC
C_RS04935	22.9604	0.090449	-1.53431	3-phosphoshikimate 1-carboxyvinyltransferase
C_RS19705	1.07921	0.588134	-1.52966	shikimate kinase AroK
C_RS09905	12.0693	0.43756	-1.52921	FAD-dependent oxidoreductase
C_RS01220	22.1485	0.0928131	-1.52888	IS110-like element ISEc45 family transposase
C_RS18815	5.63366	0.466424	-1.52733	monofunctional biosynthetic peptidoglycan transglycosylase
C_RS25375	9.65347	0.382336	-1.52545	DUF4391 domain-containing protein
C_RS09655	5.54455	0.229418	-1.52382	lactoylglutathione lyase
C_RS11370	1.47525	0.473827	-1.52356	TIR domain-containing protein
C_RS15305	9.52475	0.166239	-1.52286	L-alanine exporter AlaE
C_RS08290	2.19802	0.476437	-1.52265	peptide ABC transporter permease SapB
C_RS28455	0.772277	0.620682	-1.52256	hypothetical protein
C_RS05795	7.0198	0.467344	-1.52106	hypothetical protein
C_RS23050	15.3564	0.149098	-1.52079	class II fructose-bisphosphatase
C_RS20085	6.49505	0.265436	-1.52067	high-affinity branched-chain amino acid ABC transporter ATP-binding protein LivF
C_RS24070	7.63366	0.397356	-1.51996	allose kinase
C_RS28960	2.66337	0.470478	-1.51515	HNH endonuclease
C_RS20240	0.643564	0.629463	-1.51394	PTS sugar transporter subunit IIB
C_RS16195	13.3366	0.297772	-1.51306	exodeoxyribonuclease V subunit alpha
C_RS05955	19.6634	0.176283	-1.51094	SEL1-like repeat protein
C_RS04020	27.3168	0.0171756	-1.5108	hydratase
C_RS02560	17.0099	0.358239	-1.50967	peptidylprolyl isomerase
C_RS07450	24.8713	0.0888753	-1.50925	phage tail protein
C_RS14215	10	0.0820256	-1.50824	GDP-mannose pyrophosphatase NudK
C_RS23260	10.6931	0.541059	-1.50671	MFS transporter
C_RS09270	2.85149	0.386021	-1.50614	putative selenium delivery protein YdfZ
C_RS09000	4.40594	0.373665	-1.50571	diguanylate cyclase
C_RS25995	1.82178	0.469888	-1.50539	hypothetical protein
C_RS15250	7.27723	0.245246	-1.5048	carbon starvation induced protein CsiD
C_RS26130	8.60396	0.225119	-1.5039	hypothetical protein
C_RS12105	8.35644	0.231187	-1.50332	1-(5-phosphoribosyl)-5-[(5- phosphoribosylamino)methylideneamino]imidazole-4- carboxamide isomerase
C_RS19775	23.3663	0.0848515	-1.50316	phosphoenolpyruvate carboxykinase (ATP)
C_RS12200	13.1881	0.331535	-1.49992	colanic acid undecaprenyl disphosphate flippase WzxC
C_RS06820	2.67327	0.551749	-1.49957	phage tail protein
C_RS09410	11.5941	0.134291	-1.49787	DUF1471 domain-containing protein
C_RS06715	2.53465	0.450462	-1.49742	DUF1737 domain-containing protein
C_RS11085	11.6238	0.390015	-1.4974	flagellar filament capping protein FliD
C_RS05080	10.4158	0.387813	-1.49725	aliphatic sulfonate ABC transporter substrate-binding protein SsuA
C_RS14435	5.31683	0.361771	-1.49637	cytoskeleton protein RodZ
C_RS22910	6.9505	0.479422	-1.49545	formate dehydrogenase accessory sulfurtransferase FdhD
C_RS23220	13.099	0.279863	-1.4952	helix-turn-helix domain-containing protein
C_RS18525	10.7525	0.113402	-1.49507	divisome-associated lipoprotein YraP
C_RS07040	16.3762	0.0240557	-1.49356	two-component system response regulator PhoP
C_RS07845	19.0099	0.0425725	-1.49323	inverse autotransporter invasin YchO
C_RS17975	3.91089	0.579723	-1.49161	DUF1190 family protein
C_RS18790	6.49505	0.221605	-1.49076	ribosome hibernation promoting factor
C_RS06150	19.6238	0.126096	-1.49039	cardiolipin synthase ClsC
C_RS22185	0.693069	0.217811	-1.48898	thioredoxin TrxA
C_RS13060	5.64356	0.508627	-1.48762	DNA oxidative demethylase AlkB
C_RS21195	19.4752	0.167927	-1.4867	glycoside-pentoside-hexuronide family transporter
C_RS07420	17.901	0.230877	-1.48573	phage tail tape measure protein
C_RS17535	9.34653	0.405626	-1.48394	ABC transporter permease
C_RS07670	23.3762	0.0127494	-1.48326	potassium/proton antiporter
C_RS20005	13.3861	0.316205	-1.48207	gluconate operon transcriptional repressor GntR
C_RS10330	0.138614	0.966771	-1.48174	glyceraldehyde-3-phosphate dehydrogenase
C_RS21400	10.5941	0.279219	-1.48028	propanediol utilization microcompartment proteinPduB
C_RS07005	3.41584	0.330626	-1.4801	hypothetical protein
C_RS12140	10.7723	0.0371828	-1.47852	mannose-1-phosphate guanyltransferase
C_RS21355	7.28713	0.11139	-1.47841	DNA-binding protein
C_RS02335	20.802	0.246553	-1.47826	exonuclease subunit SbcC
C_RS29545	1.70297	0.501981	-1.47805	hypothetical protein
C_RS05445	11.495	0.100344	-1.47166	phosphate starvation-inducible protein PhoH
C_RS23125	17.6139	0.19539	-1.47149	bifunctional aspartate kinase/homoserine dehydrogenase II
C_RS11735	12.7822	0.095986	-1.47143	L,D-transpeptidase
C_RS06270	11.7822	0.214398	-1.47122	Gfo/Idh/MocA family oxidoreductase
C_RS21060	7.44554	0.545178	-1.46969	DNA repair protein RadC
C_RS00045	23.2673	0.056084	-1.46956	sodium:alanine symporter family protein
C_RS11535	9.25743	0.297221	-1.46919	yersiniabactin biosynthesis salycil-AMP ligase YbtE
C_RS00365	3.38614	0.391612	-1.46896	hypothetical protein
C_RS24385	6.49505	0.391341	-1.46762	antirestriction protein
C_RS24260	18.4455	0.502702	-1.46568	class I fumarate hydratase
C_RS17100	2.9703	0.496672	-1.46264	DUF417 family protein
C_RS17990	12.4554	0.170824	-1.46244	thiol:disulfide interchange protein DsbA/DsbL
C_RS19625	8.73267	0.476604	-1.46239	uroporphyrinogen-III C-methyltransferase
C_RS17400	8.13861	0.233784	-1.46228	hypothetical protein
C_RS23580	3.82178	0.335567	-1.46019	hypothetical protein
C_RS24890	4.30693	0.583525	-1.45707	PspA/IM30 family protein
C_RS15210	11.3366	0.135858	-1.45471	hypothetical protein
C_RS21095	9.87129	0.155988	-1.44986	DNA damage-inducible protein D
C_RS23685	4.57426	0.520249	-1.44787	phosphate-starvation-inducible protein PsiE
C_RS20910	17.8812	0.205223	-1.44767	quinone-dependent L-lactate dehydrogenase
C_RS28915	4.36634	0.351477	-1.44555	periplasmic protein
C_RS01565	17.0891	0.15782	-1.44475	LacI family DNA-binding transcriptional regulator
C_RS07850	9.06931	0.166715	-1.44355	two-component system response regulator NarL
C_RS02045	7.09901	0.306854	-1.44205	DUF2877 domain-containing protein
C_RS07430	6.27723	0.524926	-1.44134	phage minor tail protein L
C_RS17995	14.3366	0.117171	-1.44046	protein-disulfide oxidoreductase DsbI
C_RS24335	6.21782	0.487886	-1.43941	DUF4942 domain-containing protein
C_RS24480	8.14851	0.306843	-1.43758	P fimbria tip G-adhesin PapG-II
C_RS25510	13.1584	0.136374	-1.43756	fructuronate reductase
C_RS20955	17.0297	0.130317	-1.43294	divergent polysaccharide deacetylase family protein
C_RS25910	17.5149	0.0167012	-1.43092	MDR efflux pump AcrAB transcriptional activator RobA
C_RS24005	4.28713	0.349674	-1.43077	sel1 repeat family protein
C_RS00545	4.60396	0.444299	-1.43033	8-oxo-dGTP diphosphatase MutT
C_RS17825	10.2673	0.126575	-1.42986	Ldh family oxidoreductase
C_RS29250	3.51485	0.483405	-1.42866	putative protein YneK
C_RS12840	7.9703	0.466245	-1.42794	elongation factor P-like protein YeiP
C_RS06255	12.3861	0.257561	-1.4277	multidrug efflux MFS transporter MdtH
C_RS17800	5.60396	0.233034	-1.42675	lipoprotein YqhH
C_RS10920	6.46535	0.495277	-1.42428	flagellar transcriptional regulator FlhC
C_RS20540	8.73267	0.240911	-1.42422	cellulose biosynthesis protein BcsQ
C_RS02570	6.68317	0.362562	-1.42371	long-chain acyl-CoA thioesterase FadM
C_RS18450	2.59406	0.545131	-1.42295	PTS N-acetylgalactosamine transporter subunit IIB
C_RS20770	14.8812	0.186158	-1.42097	IclR family transcriptional regulator YiaJ
C_RS25370	25.2475	0.186079	-1.41939	site-specific DNA-methyltransferase
C_RS13535	13.3861	0.0746583	-1.41917	lysine/arginine/ornithine ABC transporter substrate-binding protein ArgT
C_RS17095	3.27723	0.470616	-1.41755	TetR/AcrR family transcriptional regulator
C_RS24015	12.3465	0.513493	-1.41724	ABC transporter ATP-binding protein
C_RS23935	14.0891	0.145201	-1.41456	LysR family transcriptional regulator
C_RS11775	22.297	0.0298568	-1.41193	phosphoadenosine phosphosulfate reductase
C_RS18685	24.8713	0.0195929	-1.41125	serine-type D-Ala-D-Ala carboxypeptidase
C_RS19825	10.8614	0.338723	-1.41089	Rpn family recombination-promoting nuclease/putative transposase
C_RS01280	9.10891	0.237001	-1.40991	hypothetical protein
C_RS07110	7.39604	0.157932	-1.40991	hypothetical protein
C_RS14465	5.53465	0.327973	-1.40843	enhanced serine sensitivity protein SseB
C_RS22660	0.148515	0.555673	-1.40831	menaquinone-dependent protoporphyrinogen IX dehydrogenase
C_RS15220	5.47525	0.252315	-1.40753	DUF2303 family protein
C_RS10080	16.9208	0.211705	-1.4065	6-phospho-beta-glucosidase
C_RS13880	16.0693	0.191692	-1.40611	ion channel protein
C_RS03205	11.5446	0.194441	-1.40607	hydroxycarboxylate dehydrogenase HcxA
C_RS04140	12.0099	0.0288739	-1.40464	ABC transporter permease
C_RS04105	11.7921	0.423107	-1.40196	Bax inhibitor-1/YccA family protein
C_RS15760	11.3069	0.248697	-1.40108	sulfate adenylyltransferase subunit CysN
C_RS04155	8.73267	0.137584	-1.40006	DNA-binding transcriptional regulator CecR
C_RS16590	12.5842	0.485113	-1.39946	phosphoglycerate dehydrogenase
C_RS19430	6.32673	0.306831	-1.39738	type II secretion system minor pseudopilin GspJ
C_RS19610	30.2772	0.127074	-1.39592	NADPH-nitrite reductase large subunit
C_RS20170	0.0792079	0.638285	-1.39525	sulfurtransferase TusA
C_RS00575	0.326733	0.692009	-1.39228	dephospho-CoA kinase
C_RS07790	0.138614	0.966771	-1.39196	glutamyl-tRNA reductase
C_RS15790	10.5347	0.348424	-1.39129	NADPH-dependent assimilatory sulfite reductase flavoprotein subunit
C_RS18125	9.51485	0.335105	-1.38934	L(+)-tartrate dehydratase subunit alpha
C_RS23075	13.1584	0.325458	-1.38814	1,4-dihydroxy-2-naphthoate polyprenyltransferase
C_RS18360	16.1485	0.422774	-1.38659	HAAAP family serine/threonine permease
C_RS21310	13.8416	0.293649	-1.38487	TatD family hydrolase
C_RS13775	3.09901	0.481086	-1.38385	acid-sensing system DNA-binding response regulator EvgA
C_RS13905	37.8416	0.00303211	-1.38233	sensor domain-containing phosphodiesterase
C_RS16545	19.6337	0.292472	-1.38231	aminomethyl-transferring glycine dehydrogenase
C_RS23725	3.44554	0.476895	-1.38107	chorismate lyase
C_RS20175	10.1485	0.363212	-1.38091	7-cyano-7-deazaguanine/7-aminomethyl-7- deazaguanine transporter
C_RS05285	2.51485	0.521957	-1.37909	cold shock-like protein CspH
C_RS00250	2.0396	0.54925	-1.37812	ferredoxin-like protein FixX
C_RS07375	2.53465	0.563533	-1.37624	head decoration protein
C_RS09015	14.0099	0.335474	-1.37399	glutamate decarboxylase
C_RS17000	8.35644	0.449136	-1.37364	P fimbria tip G-adhesin PapG-II
C_RS11680	17.9109	0.152201	-1.37272	colibactin biosynthesis acyltransferase ClbG
C_RS17650	9.07921	0.232446	-1.37088	ATP-binding protein
C_RS18130	6.0495	0.401912	-1.37084	L(+)-tartrate dehydratase subunit beta
C_RS09955	5.21782	0.48608	-1.37072	C40 family peptidase
C_RS09370	1.27723	0.497796	-1.37069	acid shock protein
C_RS01990	7.51485	0.317068	-1.3702	tyrosine-type recombinase/integrase
C_RS07470	12.1881	0.131005	-1.36629	iron/manganese ABC transporter permease subunit SitC
C_RS02315	3.54455	0.489789	-1.36577	DUF2773 domain-containing protein
C_RS27460	4.23762	0.284294	-1.36369	type I toxin-antitoxin system Ibs family toxin
C_RS20800	7.73267	0.345194	-1.36343	2,3-diketo-L-gulonate transporter substrate-binding protein YiaO
C_RS16575	7.0495	0.404857	-1.36202	UPF0149 family protein YgfB
C_RS24595	5.51485	0.373371	-1.35962	hypothetical protein
C_RS22075	11.4752	0.328367	-1.35881	FadR family transcriptional regulator
C_RS23590	12.7921	0.17509	-1.35843	dipeptidase PepE
C_RS22130	20.9307	0.0553139	-1.35808	acetolactate synthase 2 catalytic subunit
C_RS23960	13.3663	0.538033	-1.35722	acetate--CoA ligase
C_RS15185	3.88119	0.594327	-1.35617	helix-turn-helix domain-containing protein
C_RS03390	10.7723	0.0269567	-1.35558	adenosylcobalamin/alpha-ribazole phosphatase
C_RS14270	7.41584	0.146565	-1.35509	phosphoribosylaminoimidazolesuccinocarboxamide synthase
C_RS17655	6.75248	0.469642	-1.35103	thymidylate kinase
C_RS18535	4.19802	0.440662	-1.34904	NAD(P)H-binding protein
C_RS11925	12.5248	0.432483	-1.34876	hypothetical protein
C_RS05575	5.13861	0.30731	-1.34702	3-hydroxy-fatty acyl-ACP dehydratase
C_RS10825	8.45545	0.239828	-1.34503	tRNA 5-methoxyuridine(34)/uridine 5-oxyacetic acid(34) synthase CmoB
C_RS17415	7.40594	0.43193	-1.34482	antirestriction protein
C_RS04195	5.69307	0.475277	-1.34335	PKHD-type hydroxylase YbiX
C_RS12080	7.19802	0.273553	-1.34165	ATP phosphoribosyltransferase
C_RS13215	11.6832	0.378408	-1.34042	anaerobic glycerol-3-phosphate dehydrogenase subunit C
C_RS02970	6.29703	0.272219	-1.34035	metal-dependent hydrolase
C_RS15715	23.0594	0.016082	-1.3399	murein hydrolase activator NlpD
C_RS23160	19.1881	0.158227	-1.33983	catalase/peroxidase HPI
C_RS25320	14.3564	0.511827	-1.33791	DUF853 domain-containing protein
C_RS22500	21.0099	0.0974762	-1.33705	cytosine permease
C_RS14280	12.4455	0.209244	-1.33547	outer membrane protein assembly factor BamC
C_RS00065	9.57426	0.115705	-1.33387	acetate uptake transporter
C_RS20445	6.75248	0.527101	-1.33321	acid resistance transcriptional activator GadX
C_RS24685	23.9208	0.044979	-1.3319	L-methionine/branched-chain amino acid transporter
C_RS21875	16.7822	0.158642	-1.33175	adenine permease AdeP
C_RS01210	4.26733	0.554609	-1.33162	IS66 family insertion sequence element accessoryprotein TnpB
C_RS23495	10.1782	0.508664	-1.3313	phosphoribosylamine--glycine ligase
C_RS18950	12.0396	0.0648688	-1.33099	HTH-type transcriptional activator AaeR
C_RS23085	6.56436	0.454163	-1.33072	ATP-dependent protease subunit HslV
C_RS03455	7.23762	0.484619	-1.33055	CNNM family magnesium/cobalt transport protein CorC
C_RS23945	11.6634	0.0985252	-1.32945	LrgB family protein
C_RS14365	7.37624	0.539932	-1.32803	glycine zipper 2TM domain-containing protein
C_RS09965	5.30693	0.348303	-1.32535	bifunctional thioredoxin/glutathione peroxidase
C_RS04095	0.653465	0.743666	-1.32215	molybdopterin synthase sulfur carrier subunit
C_RS13790	8.9802	0.109832	-1.3202	transporter YfdV
C_RS17615	4.83168	0.422687	-1.31881	acyl carrier protein
C_RS04795	11.8218	0.139668	-1.31664	macrolide transporter subunit MacA
C_RS22450	23.8119	0.0990429	-1.31657	5-methyltetrahydropteroyltriglutamate-- homocysteine S-methyltransferase
C_RS29835	6.85149	0.299795	-1.31483	GNAT family N-acetyltransferase
C_RS22465	6.77228	0.381986	-1.3145	hypothetical protein
C_RS09230	19.6238	0.234976	-1.31407	efflux MFS transporter YdeE
C_RS15815	10.7426	0.366352	-1.31268	electron transfer flavoprotein subunit alpha/FixB family protein
C_RS09810	12.0792	0.0440317	-1.31222	Fe-S cluster assembly protein SufD
C_RS29595	11.2772	0.509842	-1.31039	hemagglutinin repeat-containing protein
C_RS22755	0.39604	0.0119753	-1.30859	nitrogen regulation protein NR(I)
C_RS20990	4.55446	0.279353	-1.30837	O-antigen ligase family protein
C_RS17590	15.3267	0.232848	-1.30751	glycolate oxidase subunit GlcD
C_RS03985	8.0099	0.53233	-1.30647	molybdate ABC transporter permease subunit
C_RS04675	13.7624	0.233996	-1.30301	putrescine ABC transporter ATP-binding subunit PotG
C_RS09280	16.0099	0.240836	-1.30217	MHS family MFS transporter YdfJ
C_RS13835	20.3564	0.42796	-1.30168	two-component system sensor histidine kinase YpdA
C_RS16510	0.970297	0.580607	-1.30132	flavodoxin FldB
C_RS10100	3.61386	0.46358	-1.30047	PTS N,N'-diacetylchitobiose transporter subunit IIB
C_RS28760	5.30693	0.465291	-1.30038	YdfR family protein
C_RS18735	12.2376	0.0346807	-1.29782	phospholipid-binding protein MlaC
C_RS07885	10.297	0.314906	-1.29712	respiratory nitrate reductase subunit gamma
C_RS08255	16.0693	0.380258	-1.29602	efflux RND transporter periplasmic adaptor subunit
C_RS02055	10.3168	0.358812	-1.29565	DUF1116 domain-containing protein
C_RS02095	14.703	0.250393	-1.29522	propionate catabolism operon regulatory protein PrpR
C_RS15865	10.9406	0.499783	-1.29325	YgcG family protein
C_RS09870	4.46535	0.564319	-1.29299	type I 3-dehydroquinate dehydratase
C_RS17540	5.66337	0.357109	-1.29259	GspM family type II secretion system protein YghD
C_RS03610	0.257426	0.317137	-1.28994	ferric iron uptake transcriptional regulator
C_RS10990	11.901	0.323871	-1.28991	tyrosine transporter TyrP
C_RS12605	2.12871	0.594834	-1.28941	protein YohO
C_RS10535	4.0198	0.539297	-1.28938	DUF986 domain-containing protein
C_RS10910	7.12871	0.460086	-1.28854	flagellar motor protein MotB
C_RS12415	9.79208	0.404637	-1.28827	PTS galactitol transporter subunit IIC
C_RS10030	9.16832	0.317947	-1.28774	6-phosphofructokinase II
C_RS16395	10.1287	0.256048	-1.28694	carbamate kinase
C_RS15780	6.05941	0.542419	-1.28476	phosphoadenosine phosphosulfate reductase
C_RS16045	16.495	0.334554	-1.28457	murein transglycosylase A
C_RS19640	20.4752	0.0502751	-1.28454	YhfT family protein
C_RS02925	11.9703	0.258164	-1.2844	DUF1116 domain-containing protein
C_RS25710	9.91089	0.107433	-1.28434	threonine/serine exporter
C_RS11150	3.51485	0.474842	-1.28349	flagellar hook-basal body complex protein FliE
C_RS22220	12.0495	0.177797	-1.28336	UDP-N-acetyl-D-mannosamine dehydrogenase
C_RS14505	0.188119	0.259339	-1.28238	cysteine desulfurase
C_RS05525	14.0891	0.298249	-1.28192	putative C-S lyase
C_RS20075	18.0495	0.155634	-1.28148	sn-glycerol-3-phosphate ABC transporter substrate-binding protein UgpB
C_RS21030	7.83168	0.376404	-1.28134	lipopolysaccharide core heptosyltransferase RfaQ
C_RS12725	15.3663	0.118804	-1.27979	HTH-type transcriptional regulator GalS
C_RS15010	4.52475	0.34486	-1.27973	phage minor tail protein L
C_RS00565	0.653465	0.473517	-1.27947	DNA gyrase inhibitor YacG
C_RS16425	4.94059	0.493587	-1.27857	molybdopterin-dependent oxidoreductase FAD-binding subunit
C_RS06410	8.33663	0.299172	-1.27656	aminodeoxychorismate lyase
C_RS15575	8.07921	0.136152	-1.27391	formate hydrogenlyase assembly protein HycH
C_RS09825	3.80198	0.334294	-1.27378	Fe-S cluster assembly scaffold SufA
C_RS29640	3.0198	0.525316	-1.27338	hypothetical protein
C_RS00160	13.7426	0.0152171	-1.27298	ribonucleoside hydrolase RihC
C_RS22530	8.43564	0.42241	-1.27295	cysteine hydrolase
C_RS20355	10.1287	0.131568	-1.27286	hematinate-forming heme oxygenase ChuS
C_RS24945	21.9604	0.240162	-1.27231	PTS ascorbate transporter subunit IIC
C_RS06555	9.08911	0.317574	-1.27179	spermidine/putrescine ABC transporter permease PotC
C_RS29045	10.3663	0.472679	-1.27024	hypothetical protein
C_RS25610	1.75248	0.491786	-1.27022	endoribonuclease SymE
C_RS14040	7.20792	0.525599	-1.26996	cysteine synthase B
C_RS21560	4.42574	0.394038	-1.26946	type IV toxin-antitoxin system YeeU family antitoxin
C_RS13020	2.63366	0.386996	-1.26778	ferredoxin-type protein NapG
C_RS05465	26.1287	0.4716	-1.26731	poly-beta-1,6 N-acetyl-D-glucosamine export porin PgaA
C_RS14370	3.86139	0.593845	-1.26723	DUF5384 family protein
C_RS16430	44.5941	0.00341264	-1.26668	molybdopterin-dependent oxidoreductase Mo/Fe-S-binding subunit
C_RS13965	17.7624	0.227476	-1.26547	xanthosine/proton symporter XapB
C_RS22065	21.3069	0.094405	-1.26493	ribose operon transcriptional repressor RbsR
C_RS24045	13.2772	0.539871	-1.26351	multidrug efflux transporter outer membrane subunit MdtP
C_RS24700	6.05941	0.255156	-1.26269	DUF4156 domain-containing protein
C_RS04990	12.7228	0.154804	-1.26167	YcbJ family phosphotransferase
C_RS19525	1.58416	0.506134	-1.26154	YheV family putative metal-binding protein
C_RS18690	1.05941	0.353791	-1.2615	Obg family GTPase CgtA
C_RS13220	16.1683	0.0294028	-1.26034	ISNCY family transposase
C_RS17250	5.56436	0.515523	-1.26002	alpha/beta hydrolase
C_RS06280	3.15842	0.570774	-1.25903	flagella biosynthesis chaperone FlgN
C_RS24295	2.94059	0.562448	-1.25883	type V toxin-antitoxin system endoribonuclease antitoxin GhoS
C_RS08935	15.7921	0.174282	-1.25878	aromatic amino acid efflux DMT transporter YddG
C_RS18180	19.0495	0.352709	-1.25769	aerotaxis sensor receptor Aer
C_RS06195	17.3564	0.351747	-1.25639	multidrug efflux MFS transporter MdtG
C_RS13750	12.6139	0.289885	-1.25403	DNA-binding transcriptional regulator DsdC
C_RS16620	13.198	0.330796	-1.2532	oxidative stress defense protein
C_RS00380	12.5248	0.103075	-1.25095	thiamine/thiamine pyrophosphate ABC transporter permease ThiP
C_RS04185	3.41584	0.522164	-1.24929	DUF1471 domain-containing protein
C_RS28130	7.92079	0.450468	-1.24907	hypothetical protein
C_RS16140	8.15842	0.36637	-1.249	type VI secretion system baseplate subunit TssG
C_RS02515	20.6931	0.0701975	-1.24827	muropeptide MFS transporter AmpG
C_RS20545	3.14851	0.506601	-1.24729	YhjR family protein
C_RS13425	0.712871	0.644815	-1.24717	NADH-quinone oxidoreductase subunit NuoA
C_RS05995	7.39604	0.39826	-1.24609	hypothetical protein
C_RS08180	0.267327	0.966771	-1.24602	GTP cyclohydrolase II
C_RS04130	4.47525	0.495246	-1.24517	YbhQ family protein
C_RS08420	9.76238	0.514563	-1.2401	L-Ala-D/L-Glu epimerase
C_RS00360	1.52475	0.286469	-1.23884	hypothetical protein
C_RS25330	22.8119	0.323603	-1.23853	gnt-II system L-idonate transporter
C_RS10055	7	0.154119	-1.23832	metal-dependent hydrolase
C_RS12325	10.5941	0.318837	-1.23384	protein-serine/threonine phosphatase PphC
C_RS02150	6.53465	0.22171	-1.23273	DUF2058 domain-containing protein
C_RS24965	6.73267	0.231845	-1.23159	L-ribulose-5-phosphate 3-epimerase UlaE
C_RS16715	10.6931	0.397185	-1.23014	metalloprotease LoiP
C_RS22250	9.51485	0.532145	-1.23008	TDP-N-acetylfucosamine:lipid II N-acetylfucosaminyltransferase
C_RS06620	5.11881	0.488162	-1.22969	DUF977 family protein
C_RS15460	0.138614	0.657043	-1.22948	alanine--tRNA ligase
C_RS05025	8.42574	0.182444	-1.22807	YcbK family protein
C_RS24105	4.63366	0.479965	-1.22774	protein YjdP
C_RS11070	7.54455	0.330103	-1.22759	flagella biosynthesis regulatory protein FliZ
C_RS13655	6.63366	0.393882	-1.22758	fimbrial protein
C_RS24220	23.9505	0.308334	-1.22577	phosphoethanolamine transferase EptA
C_RS02355	15.9604	0.409478	-1.22406	branched-chain amino acid transporter carrier protein BrnQ
C_RS12450	14.505	0.150232	-1.22401	MFS transporter
C_RS19780	4.52475	0.436275	-1.22396	type II toxin-antitoxin system RelE/ParE family toxin
C_RS16375	19.802	0.164942	-1.22239	knotted carbamoyltransferase YgeW
C_RS03915	5.63366	0.382319	-1.22228	cation diffusion facilitator family transporter
C_RS02445	8.74257	0.430188	-1.22017	1-deoxyxylulose-5-phosphate synthase YajO
C_RS00805	15.4752	0.102503	-1.22002	fimbrial chaperone
C_RS11400	3.9901	0.337898	-1.21883	helix-hairpin-helix domain-containing protein
C_RS21755	11.9802	0.431533	-1.21849	galactonate dehydratase
C_RS07275	7.05941	0.358923	-1.21831	phage N-6-adenine-methyltransferase
C_RS13255	5.45545	0.498293	-1.21798	nucleoside triphosphatase NudI
C_RS10350	24.2079	0.00316576	-1.21579	protein kinase YeaG
C_RS10270	18.7525	0.027028	-1.21488	asparaginase
C_RS22505	4.41584	0.381854	-1.21466	glutamyl-tRNA amidotransferase
C_RS09010	25.7228	0.0101353	-1.21324	acid resistance gamma-aminobutyrate antiporter GadC
C_RS08005	9.70297	0.224363	-1.21296	murein tripeptide/oligopeptide ABC transporter ATP binding protein OppF
C_RS12315	11.4158	0.41869	-1.21201	molecular chaperone
C_RS08160	2.61386	0.492145	-1.21185	YmiA family putative membrane protein
C_RS08340	13.6733	0.0758412	-1.2112	glucosylglycerate phosphorylase
C_RS18745	8.63366	0.449072	-1.20995	lipid asymmetry maintenance ABC transporter permease subunit MlaE
C_RS25895	4.19802	0.335531	-1.20954	trp operon repressor
C_RS25585	4.13861	0.518623	-1.20862	hypothetical protein
C_RS10600	18.3366	0.237119	-1.20605	carboxy terminal-processing peptidase
C_RS14900	17.9109	0.175744	-1.20481	HlyC/CorC family transporter
C_RS09415	11.9208	0.193433	-1.20166	amino acid permease
C_RS20090	9.18812	0.415953	-1.20134	high-affinity branched-chain amino acid ABC transporter ATP-binding protein LivG
C_RS20630	16.4158	0.352004	-1.19988	MFS transporter
C_RS05215	2.40594	0.434233	-1.19855	acylphosphatase
C_RS10455	7.06931	0.405516	-1.19795	Slp family lipoprotein YeaY
C_RS05645	17.8911	0.173481	-1.19655	methyltransferase domain-containing protein
C_RS12550	0.673267	0.605392	-1.19654	hypothetical protein
C_RS06365	9.27723	0.243293	-1.19388	7-methyl-GTP pyrophosphatase
C_RS23785	26.9703	0.0624552	-1.19236	MHS family MFS transporter
C_RS13640	5.86139	0.463891	-1.19212	endonuclease SmrB
C_RS01695	12.7129	0.144208	-1.19152	2-oxoglutaramate amidase
C_RS17635	6.14851	0.579774	-1.19066	YtfJ family protein
C_RS22140	10.5941	0.348627	-1.19027	branched-chain-amino-acid transaminase
C_RS20785	5.67327	0.429551	-1.18993	DUF4862 family protein
C_RS09435	16.1683	0.0356163	-1.18818	two-component system sensor histidine kinase RstB
C_RS06985	13.2574	0.457037	-1.18798	DNA primase
C_RS22300	14.2772	0.181019	-1.18795	protoheme IX biogenesis protein HemY
C_RS29695	1.35644	0.350638	-1.18703	hypothetical protein
C_RS19985	2.10891	0.513492	-1.18505	DNA-protecting protein DprA
C_RS14175	5.34653	0.27386	-1.18482	ethanolamine utilization cob(I)yrinic acid a,c-diamide adenosyltransferase EutT
C_RS14595	14.7723	0.0981946	-1.18296	two-component system response regulator GlrR
C_RS09790	1.90099	0.494825	-1.18294	murein lipoprotein Lpp
C_RS21150	8.74257	0.386393	-1.18168	D-lyxose/D-mannose family sugar isomerase
C_RS19510	8.9505	0.439703	-1.18167	FKBP-type peptidyl-prolyl cis-trans isomerase
C_RS29520	0.386139	0.670986	-1.18048	type I toxin-antitoxin system toxin Ldr family protein
C_RS01590	4.9703	0.465799	-1.17933	adhesin
C_RS21100	11	0.340531	-1.17921	trimeric intracellular cation channel family protein
C_RS17290	5.19802	0.263074	-1.17812	IS66 family insertion sequence hypothetical protein
C_RS28360	12.604	0.220398	-1.17712	IS1 family transposase
C_RS15640	11.901	0.276502	-1.17651	hydrogenase maturation carbamoyl dehydratase HypE
C_RS21840	1.64356	0.524339	-1.17473	tryptophanase leader peptide
C_RS10095	23.3366	0.15172	-1.17472	PTS N,N'-diacetylchitobiose transporter subunit IIC
C_RS23215	4.83168	0.545952	-1.17413	PTS fructose-like transporter subunit IIB
C_RS21545	7.92079	0.392539	-1.17409	antirestriction protein
C_RS24710	3.90099	0.485343	-1.17246	EF-P beta-lysylation protein EpmB
C_RS00615	16.9307	0.0910053	-1.17212	beta-lactamase regulator AmpE
C_RS00770	6.36634	0.312478	-1.17153	pantoate--beta-alanine ligase
C_RS08760	10.4455	0.447966	-1.17064	ABC transporter permease
C_RS28575	24.0792	0.0777971	-1.16887	oxygen-sensing cyclic-di-GMP phosphodiesterase
C_RS09510	10.7228	0.214446	-1.16885	oxidoreductase
C_RS09220	3.77228	0.544983	-1.16824	GntR family transcriptional regulator
C_RS24825	22.198	0.107828	-1.16734	N-acetylmuramoyl-L-alanine amidase AmiB
C_RS25060	16.4653	0.346814	-1.16636	D-serine/D-alanine/glycine transporter
C_RS08375	24.7624	0.158597	-1.16362	kojibiose phosphorylase
C_RS14600	6.37624	0.356964	-1.16254	two-component system QseEF-associated lipoprotein QseG
C_RS07225	19.3663	0.372133	-1.16033	hypothetical protein
C_RS16105	9.58416	0.458421	-1.15944	hypothetical protein
C_RS20480	23.6832	0.0990168	-1.1586	MHS family MFS transporter
C_RS07755	1.87129	0.328308	-1.15715	redox-regulated ATPase YchF
C_RS15360	12.1683	0.46125	-1.15644	glycine betaine/L-proline ABC transporter substrate-binding protein ProX
C_RS00850	32.1485	0.0127524	-1.15568	bifunctional glycosyl transferase/transpeptidase
C_RS16355	37.1683	0.036064	-1.15511	xanthine dehydrogenase molybdenum-binding subunit XdhA
C_RS29760	1.77228	0.536907	-1.15429	hypothetical protein
C_RS18040	0.683168	0.618949	-1.15373	accessory factor UbiK family protein
C_RS10185	9.42574	0.489106	-1.15076	ABC transporter substrate-binding protein
C_RS13550	5	0.433107	-1.14922	colicin V production protein
C_RS02430	0.287129	0.692443	-1.14594	transcription antitermination factor NusB
C_RS06505	28.1089	0.113523	-1.14519	transcription-repair coupling factor
C_RS11560	8.34653	0.459245	-1.14418	hypothetical protein
C_RS11375	1.31683	0.47317	-1.14393	hypothetical protein
C_RS04535	7.25743	0.329315	-1.1432	hypothetical protein
C_RS14580	1.12871	0.112069	-1.14134	serine hydroxymethyltransferase
C_RS16100	24.8515	0.487135	-1.14134	type VI secretion system tip protein VgrG
C_RS09450	11.2574	0.138124	-1.13976	class I fumarate hydratase
C_RS19955	28.8515	0.00377931	-1.13967	glycogen synthase GlgA
C_RS01980	8.80198	0.436058	-1.13697	hypothetical protein
C_RS03045	10.9901	0.535027	-1.13669	Cu(+)/Ag(+) efflux RND transporter outer membrane channel CusC
C_RS15605	3.54455	0.415158	-1.13602	formate hydrogenlyase subunit HycB
C_RS23430	10.4653	0.147126	-1.13598	thiazole biosynthesis adenylyltransferase ThiF
C_RS22955	13.6931	0.0879866	-1.13472	HTH-type transcriptional activator RhaR
C_RS23140	9.16832	0.308477	-1.13411	bifunctional metallophosphatase/5'-nucleotidase
C_RS17340	7.69307	0.14757	-1.13376	hypothetical protein
C_RS08085	16.8911	0.251762	-1.13312	bifunctional anthranilate synthase glutamate amidotransferase component TrpG/anthranilate phosphoribosyltransferase TrpD
C_RS14220	23.1881	0.0803556	-1.13286	formate-dependent uric acid utilization protein AegA
C_RS10405	14.6535	0.124959	-1.13237	diguanylate cyclase DgcP
C_RS07145	1.33663	0.509132	-1.13225	TraR/DksA family transcriptional regulator
C_RS02915	8.9505	0.437316	-1.1312	ureidoglycolate dehydrogenase
C_RS05140	15.8614	0.259075	-1.13108	Lon protease family protein
C_RS14185	2.68317	0.480104	-1.1305	ethanolamine utilization acetate kinase EutP
C_RS16885	18.3465	0.498211	-1.12837	integrase arm-type DNA-binding domain-containingprotein
C_RS16650	5.28713	0.235608	-1.12799	DNA-binding protein
C_RS25345	4.75248	0.450864	-1.12774	gluconokinase
C_RS09650	11.8713	0.303188	-1.12749	N-ethylmaleimide reductase
C_RS18945	3.57426	0.484653	-1.12715	AaeX family protein
C_RS15945	10.703	0.171781	-1.12629	SecY-interacting protein
C_RS08990	3.94059	0.536331	-1.12433	peroxiredoxin OsmC
C_RS19880	4.61386	0.390521	-1.12431	DeoR/GlpR family transcriptional regulator
C_RS22995	7.63366	0.560377	-1.12364	cell-envelope stress modulator CpxP
C_RS29395	3.61386	0.347408	-1.12142	hypothetical protein
C_RS17700	22.8713	0.109451	-1.12123	hydrogenase 2 large subunit
C_RS10345	17.5446	0.106984	-1.12108	scaffolding protein MipA
C_RS09675	8.34653	0.467277	-1.12066	peptidoglycan DD-endopeptidase MepH
C_RS12525	8.60396	0.310556	-1.11953	YehE family protein
C_RS04555	4.34653	0.488633	-1.11756	phage baseplate assembly protein V
C_RS19935	19.802	0.474898	-1.11535	fimbrial biogenesis usher protein
C_RS12790	10.2376	0.209468	-1.11437	ribosylpyrimidine nucleosidase
C_RS07320	11.5941	0.445704	-1.11283	lysozyme RrrD
C_RS02880	6.51485	0.242165	-1.11262	2-hydroxy-3-oxopropionate reductase
C_RS09035	23.9505	0.182217	-1.11178	ABC transporter ATP-binding protein/permease
C_RS12320	23.2772	0.155708	-1.11101	protein kinase YegI
C_RS18520	9.33663	0.252928	-1.11019	DnaA initiator-associating protein DiaA
C_RS01100	8.30693	0.316027	-1.10936	methionine ABC transporter substrate-binding lipoprotein MetQ
C_RS08060	4.05941	0.474669	-1.10861	ferritin-like domain-containing protein
C_RS16535	2.85149	0.464864	-1.10781	ASCH domain-containing protein
C_RS21610	9.50495	0.231574	-1.10768	hypothetical protein
C_RS16290	34.4257	0.0402819	-1.10465	bifunctional acyl-ACP--phospholipid O-acyltransferase/long-chain-fatty-acid--ACP ligase
C_RS12585	6	0.310797	-1.10419	DUF1456 family protein
C_RS13230	11.396	0.558	-1.10409	MFS transporter
C_RS11500	9.09901	0.178468	-1.10053	yersiniabactin transcriptional regulator YbtA
C_RS12755	28.3861	0.00916724	-1.10051	catecholate siderophore receptor CirA
C_RS20440	11.5842	0.375679	-1.09905	acid resistance transcriptional activator GadW
C_RS07380	15	0.391842	-1.09794	minor capsid protein E
C_RS20300	9.65347	0.200878	-1.09787	universal stress protein UspA
C_RS03175	14.0198	0.469339	-1.09732	(2,3-dihydroxybenzoyl)adenylate synthase EntE
C_RS14660	5.68317	0.132144	-1.09705	DNA repair protein RecO
C_RS24265	16.2871	0.548521	-1.0965	anaerobic C4-dicarboxylate transporter DcuB
C_RS21885	10.7822	0.205777	-1.09639	protein CbrB
C_RS18845	6.61386	0.43244	-1.09247	YhcH/YjgK/YiaL family protein
C_RS28335	12.3267	0.0461766	-1.09213	fimbrial protein
C_RS29060	2.26733	0.585009	-1.09012	hypothetical protein
C_RS02595	3.43564	0.312191	-1.09008	DNA-binding transcriptional regulator DecR
C_RS21745	13.7822	0.327106	-1.08976	colicin M resistance protein
C_RS09795	14.3366	0.285819	-1.08932	L,D-transpeptidase LdtE
C_RS06580	2.58416	0.580545	-1.08927	cell division inhibition protein DicB
C_RS09695	5.12871	0.498573	-1.08807	HTH-type transcriptional repressor PurR
C_RS02185	3.74257	0.464449	-1.08758	PIG-L family deacetylase
C_RS26335	4.81188	0.429485	-1.08598	type II toxin-antitoxin system RelE/ParE family toxin
C_RS00820	9.62376	0.331304	-1.08597	polynucleotide adenylyltransferase PcnB
C_RS18470	14.1881	0.152864	-1.08538	N-acetylglucosamine-6-phosphate deacetylase
C_RS09685	17.6238	0.0583476	-1.08529	MFS transporter
C_RS14450	28.6139	0.0465107	-1.08246	peptidoglycan glycosyltransferase PbpC
C_RS08140	2.93069	0.440805	-1.08202	YciN family protein
C_RS15670	6.87129	0.481024	-1.08179	DeoR/GlpR transcriptional regulator
C_RS24665	5.75248	0.262313	-1.08131	divalent cation tolerance protein CutA
C_RS07075	19.5545	0.0661779	-1.07669	phage integrase Arm DNA-binding domain-containing protein
C_RS22855	19.2673	0.212597	-1.07594	alpha/beta hydrolase
C_RS22540	10.1584	0.389412	-1.0752	dienelactone hydrolase family protein
C_RS19965	25.6238	0.137929	-1.07487	glycogen debranching protein GlgX
C_RS16075	12.7624	0.166655	-1.07463	type VI secretion system baseplate subunit TssK
C_RS18170	8.40594	0.295885	-1.07404	NADPH-dependent ferric chelate reductase
C_RS12455	9.71287	0.117268	-1.07346	ADP-ribosylglycohydrolase family protein
C_RS10240	20.9307	0.0539836	-1.07215	DNA topoisomerase III
C_RS17360	36.2178	0.026959	-1.0721	autotransporter adhesin Ag43
C_RS02785	14.4257	0.280731	-1.07196	glutaminase A
C_RS23820	9.84158	0.200095	-1.07114	nicotinamide mononucleotide transporter
C_RS15355	4.46535	0.428709	-1.07111	glycine betaine/L-proline ABC transporter permease ProW
C_RS09575	10.4158	0.244346	-1.07095	glutathione transferase GstA
C_RS12625	5.25743	0.53033	-1.07029	glycine betaine ABC transporter substrate-binding protein OsmF
C_RS09740	1.63366	0.522167	-1.07009	monooxygenase
C_RS21290	8.9901	0.290015	-1.06989	IS3 family transposase
C_RS02270	4.65347	0.445233	-1.06987	phosphate starvation-inducible protein PsiF
C_RS00735	14.1584	0.27498	-1.06986	ABC transporter ATP-binding protein
C_RS04650	11.2475	0.206258	-1.06823	nitroreductase NfsA
C_RS11335	16.5347	0.0500785	-1.06801	site-specific integrase
C_RS13375	0.643564	0.195396	-1.06763	NADH-quinone oxidoreductase subunit L
C_RS23840	13.4653	0.238484	-1.06657	2-oxoglutarate dehydrogenase complex dihydrolipoyllysine-residue succinyltransferase
C_RS12675	8.25743	0.348145	-1.06641	CidA/LrgA family protein
C_RS05880	36.802	0.0524557	-1.06632	salmochelin/enterobactin export ABC transporter IroC
C_RS18920	4.26733	0.420772	-1.06628	transcriptional regulator ArgR
C_RS06805	12.8515	0.489421	-1.06624	major capsid protein
C_RS19835	9.18812	0.419757	-1.06603	DNA utilization protein GntX
C_RS09265	3.65347	0.52576	-1.06557	DNA-binding transcriptional regulator YdfH
C_RS23635	10.4455	0.157573	-1.06476	23S rRNA pseudouridine(2604) synthase RluF
C_RS29620	4.69307	0.351363	-1.06281	hypothetical protein
C_RS07140	7	0.430344	-1.06274	ead/Ea22-like family protein
C_RS01055	7.29703	0.18454	-1.06268	YaeQ family protein
C_RS00355	9.69307	0.0501036	-1.06248	arabinose operon transcriptional regulator AraC
C_RS18320	3.65347	0.5995	-1.06138	YqjK-like family protein
C_RS03970	8.61386	0.478454	-1.06138	molybdenum-dependent transcriptional regulator
C_RS04975	12.4455	0.451428	-1.06066	winged helix-turn-helix domain-containing protein
C_RS24305	21.5644	0.547465	-1.06047	lysine--tRNA ligase
C_RS03035	23.9307	0.178131	-1.05907	Cu(+)/Ag(+) sensor histidine kinase CusS
C_RS09025	44.297	0.00890565	-1.05877	insulinase family protein
C_RS10285	6.26733	0.367845	-1.05815	DeoR/GlpR transcriptional regulator
C_RS08055	14.3861	0.0289965	-1.05802	outer membrane protein OmpW
C_RS14135	10.4257	0.288422	-1.05802	ethanolamine ammonia-lyase reactivating factor EutA
C_RS23080	5.77228	0.235024	-1.05738	HslU--HslV peptidase ATPase subunit
C_RS22405	6.45545	0.5294	-1.05711	thioesterase family protein
C_RS02820	10.6535	0.266246	-1.05547	iron export ABC transporter permease subunit FetB
C_RS03015	15.6139	0.0318775	-1.05424	omptin family outer membrane protease OmpT
C_RS12695	1.16832	0.531925	-1.05393	DUF2542 family protein
C_RS17125	4.65347	0.406692	-1.05364	hypothetical protein
C_RS22235	8.12871	0.170267	-1.05258	dTDP-4-amino-4,6-dideoxy-D-galactose acyltransferase
C_RS05405	13.7426	0.151825	-1.05095	pyrimidine utilization protein A
C_RS22340	2.68317	0.580612	-1.05018	lipoprotein
C_RS13670	8.9604	0.381766	-1.0499	fimbria/pilus periplasmic chaperone
C_RS12095	11.2178	0.189959	-1.04957	bifunctional histidinol-phosphatase/imidazoleglycerol-phosphate dehydratase HisB
C_RS25205	5.19802	0.50069	-1.04848	alpha,alpha-phosphotrehalase
C_RS21645	15.1683	0.187346	-1.04786	signal transduction histidine-protein kinase/phosphatase UhpB
C_RS01335	10.0891	0.536452	-1.04689	patatin-like phospholipase family protein
C_RS29540	2.52475	0.520385	-1.04676	DUF957 domain-containing protein
C_RS11100	20.8515	0.207804	-1.04629	alpha-amylase
C_RS15615	7.44554	0.133504	-1.04626	formate hydrogenlyase regulator HycA
C_RS24765	1.87129	0.227852	-1.04485	elongation factor P--(R)-beta-lysine ligase
C_RS05815	6.86139	0.335715	-1.04325	fimbrial protein
C_RS02400	7.48515	0.554996	-1.04273	HNH nuclease family protein
C_RS17185	4.37624	0.329491	-1.0406	IS66 family insertion sequence hypothetical protein
C_RS20555	4.21782	0.393248	-1.03884	cellulose biosynthesis protein BcsF
C_RS29670	1.52475	0.484724	-1.03846	hypothetical protein
C_RS13955	10.4554	0.334134	-1.03817	DNA-binding transcriptional regulator XapR
C_RS12235	12.7624	0.180024	-1.03814	GDP-mannose 4,6-dehydratase
C_RS06015	2.24752	0.51319	-1.03758	RadC family protein
C_RS06030	4.0198	0.317343	-1.03742	DUF987 domain-containing protein
C_RS23895	31.8119	0.227278	-1.03705	excinuclease ABC subunit UvrA
C_RS16675	8.80198	0.318875	-1.03599	nucleoside/nucleotide kinase family protein
C_RS13585	12.4554	0.112937	-1.03525	4-phosphoerythronate dehydrogenase PdxB
C_RS02115	15.198	0.211753	-1.03524	propionate--CoA ligase
C_RS17500	17.0792	0.0874004	-1.0348	capsular biosynthesis protein
C_RS13850	33.3762	0.0104525	-1.03426	phosphoenolpyruvate--protein phosphotransferase
C_RS14085	7.43564	0.316631	-1.03377	RpoE-regulated lipoprotein
C_RS17155	17.099	0.509625	-1.03272	IS3 family transposase
C_RS00700	14.6139	0.209824	-1.03058	adenosylmethionine decarboxylase
C_RS03320	4.67327	0.631006	-1.03052	fluoride efflux transporter CrcB
C_RS06265	5.41584	0.235853	-1.02959	YceH family protein
C_RS22325	1.9901	0.548874	-1.02947	iron donor protein CyaY
C_RS04030	9.48515	0.481347	-1.02672	kinase inhibitor
C_RS06655	2.55446	0.669084	-1.02588	type I toxin-antitoxin system toxin HokD
C_RS19170	13.7327	0.29555	-1.02504	gamma carbonic anhydrase family protein
C_RS18255	14.9208	0.0647804	-1.02498	Gfo/Idh/MocA family oxidoreductase
C_RS28855	9.55446	0.374892	-1.02306	IS1 family transposase
C_RS20560	15.4158	0.431073	-1.02162	cellulose biosynthesis protein BcsG
C_RS17930	11.4158	0.202716	-1.02062	ABC transporter ATP-binding protein
C_RS11765	41.2079	0.0905953	-1.02021	TonB-dependent receptor
C_RS16090	9.26733	0.224696	-1.02019	Hcp family type VI secretion system effector
C_RS06825	7.84158	0.0991551	-1.01923	tail protein
C_RS05060	27.8119	0.194629	-1.0189	aminopeptidase N
C_RS06210	9.26733	0.423924	-1.0186	YceI family protein
C_RS20505	17.9901	0.0806037	-1.01797	insulinase family protein
C_RS20525	9.89109	0.187756	-1.01756	cellulase
C_RS09165	8.40594	0.382988	-1.01557	LysR family transcriptional regulator
C_RS07030	4.58416	0.526038	-1.01531	hypothetical protein
C_RS21360	7.39604	0.271966	-1.01529	iron-containing alcohol dehydrogenase
C_RS02660	6.62376	0.29816	-1.01404	Hha toxicity modulator TomB
C_RS15045	5.77228	0.456686	-1.0134	phage tail protein
C_RS13505	7.46535	0.426589	-1.01332	dihydroneopterin triphosphate 2'-epimerase
C_RS04005	7.20792	0.220326	-1.01317	LysR family transcriptional regulator
C_RS23565	9.85149	0.431829	-1.01196	glyoxylate bypass operon transcriptional repressor IclR
C_RS21495	3.23762	0.615362	-1.01089	AlpA family transcriptional regulator
C_RS02655	1.34653	0.541688	-1.01086	hemolysin expression modulator Hha
C_RS19060	12.0396	0.348177	-1.00982	sugar kinase
C_RS23570	41.0693	0.00556296	-1.0096	methionine synthase
C_RS24065	25.3366	0.244684	-1.00851	alkyl sulfatase YjcS
C_RS15955	18.1782	0.137707	-1.00835	nucleotide 5'-monophosphate nucleosidase
C_RS19545	16.2277	0.356146	-1.00816	hydrolase
C_RS01105	14.6634	0.0238395	-1.00662	methionine ABC transporter permease MetI
C_RS23250	13.2376	0.276751	-1.00658	argininosuccinate lyase
C_RS12680	11.4356	0.225993	-1.00477	CidB/LrgB family autolysis modulator
C_RS16400	16.9307	0.514662	-1.00443	EF2563 family selenium-dependent molybdenum hydroxylase system protein
C_RS25410	1.53465	0.462936	-1.00431	hypothetical protein
C_RS21345	1.69307	0.453809	-1.00387	DUF4222 domain-containing protein
C_RS25315	0.0891089	0.641373	-1.00383	LPS export ABC transporter permease LptG
C_RS01540	23.7921	0.0595771	-1.00266	aldose 1-epimerase family protein
C_RS22305	9.44554	0.234373	-1.00156	uroporphyrinogen-III C-methyltransferase
C_RS05510	6.9505	0.292052	-1.00125	inovirus-type Gp2 protein
C_RS13330	14.604	0.150974	-1.00043	isochorismate synthase MenF
C_RS10090	4.23762	0.396448	-1.00034	PTS N,N'-diacetylchitobiose transporter subunit IIA
C_RS07985	31.3762	0.157348	-0.998568	oligopeptide ABC transporter substrate-binding protein OppA
C_RS18210	13.604	0.30903	-0.998458	amino acid permease
C_RS09100	10.9703	0.103246	-0.998337	SDR family oxidoreductase
C_RS20250	16.7327	0.273153	-0.997871	carbohydrate kinase
C_RS29800	8.20792	0.236625	-0.997862	site-specific integrase
C_RS19475	0.0990099	0.224033	-0.997711	elongation factor G
C_RS16925	13.4059	0.166224	-0.996616	response regulator transcription factor
C_RS21205	20.4257	0.455611	-0.996373	tyrosine-type recombinase/integrase
C_RS12215	14.8515	0.391382	-0.995994	mannose-1-phosphate guanyltransferase
C_RS02290	6.41584	0.197317	-0.995653	shikimate kinase AroL
C_RS04405	4.46535	0.577675	-0.994359	DNA-binding transcriptional regulator RcdA
C_RS00835	11.5347	0.454083	-0.994007	DNA/RNA nuclease SfsA
C_RS15240	6.50495	0.405084	-0.993266	hypothetical protein
C_RS02575	11.5149	0.311927	-0.99279	7-cyano-7-deazaguanine synthase QueC
C_RS03730	7.52475	0.296872	-0.992336	5-oxoprolinase subunit PxpA
C_RS19080	7.89109	0.495593	-0.991772	tRNA dihydrouridine synthase DusB
C_RS00780	25.1188	0.232134	-0.991389	fimbrial-like adhesin
C_RS03835	8.0297	0.209783	-0.990316	tol-pal system-associated acyl-CoA thioesterase
C_RS24375	2.32673	0.453459	-0.989879	DUF987 domain-containing protein
C_RS19870	21.2079	0.258046	-0.988947	RNA-splicing ligase RtcB
C_RS21445	9.58416	0.452138	-0.988584	PocR ligand-binding domain-containing protein
C_RS10675	12.6535	0.372109	-0.988383	exodeoxyribonuclease X
C_RS23120	16.9505	0.199121	-0.987657	cystathionine gamma-synthase
C_RS28475	12.9208	0.450222	-0.987036	host cell division inhibitor Icd-like protein
C_RS02620	8.24752	0.556026	-0.98693	acyl-CoA thioesterase II
C_RS18240	12.0396	0.0465699	-0.982497	23S rRNA (guanine(1835)-N(2))-methyltransferase RlmG
C_RS29330	3.61386	0.539756	-0.979851	hypothetical protein
C_RS06535	6.51485	0.54938	-0.977453	NAD-dependent protein deacylase
C_RS09460	14.1386	0.180485	-0.974729	YdgA family protein
C_RS12600	7.51485	0.25391	-0.971488	HTH-type transcriptional regulator MlrA
C_RS29665	2.69307	0.616633	-0.969596	hypothetical protein
C_RS16435	23.2574	0.375141	-0.968849	xanthine/proton symporter XanQ
C_RS18760	21.2871	0.0437175	-0.968363	arabinose-5-phosphate isomerase KdsD
C_RS10780	4.50495	0.52298	-0.967453	YebB family permuted papain-like enzyme
C_RS22290	16.3069	0.240814	-0.966606	anaerobic sulfatase maturase
C_RS04270	13.4851	0.379486	-0.965948	anion transporter
C_RS22935	12.0396	0.550178	-0.964696	L-rhamnose isomerase
C_RS03585	6.0099	0.21193	-0.963732	DeoR/GlpR transcriptional regulator
C_RS17440	5.19802	0.440987	-0.963413	toxin
C_RS05165	8.32673	0.202497	-0.962219	CRP-S regulon transcriptional coactivator Sxy
C_RS25935	1.0297	0.778966	-0.961287	two-component system response regulator ArcA
C_RS29490	3.62376	0.397828	-0.960975	Hcp family type VI secretion system effector
C_RS04110	9.28713	0.391498	-0.960885	Bax inhibitor-1/YccA family protein
C_RS23485	18.0792	0.366431	-0.96034	two-component system sensor histidine kinase ZraS
C_RS06135	6.39604	0.632891	-0.959783	curli assembly protein CsgC
C_RS01800	5.34653	0.550758	-0.959608	DUF4102 domain-containing protein
C_RS10340	15.7525	0.190053	-0.95816	methylglyoxal reductase YeaE
C_RS05330	30.1683	0.0158049	-0.957308	trimethylamine-N-oxide reductase TorA
C_RS04685	8.48515	0.29993	-0.956957	putrescine ABC transporter permease PotI
C_RS20880	4.71287	0.408923	-0.956172	hypothetical protein
C_RS29785	3.35644	0.508605	-0.955284	hypothetical protein
C_RS04050	10.0891	0.189685	-0.954967	8-amino-7-oxononanoate synthase
C_RS19635	7.32673	0.558027	-0.954133	aminotransferase class I/II-fold pyridoxal phosphate-dependent enzyme
C_RS24835	1.93069	0.380938	-0.953315	tRNA (adenosine(37)-N6)-dimethylallyltransferaseMiaA
C_RS18355	8.08911	0.511525	-0.951424	serine dehydratase subunit alpha family protein
C_RS03445	33.2376	0.0729043	-0.951023	rhomboid family intramembrane serine protease
C_RS17805	33.4653	0.0618919	-0.950726	YgiQ family radical SAM protein
C_RS05325	14.6832	0.134221	-0.948517	pentaheme c-type cytochrome TorC
C_RS11170	10.297	0.445122	-0.948201	flagellum-specific ATP synthase FliI
C_RS05685	3.65347	0.448315	-0.94747	hypothetical protein
C_RS15975	18.7426	0.263993	-0.94729	lactaldehyde reductase
C_RS09200	11.6337	0.500384	-0.94621	carbohydrate porin
C_RS10835	11.2277	0.268758	-0.944375	NapC/NirT family cytochrome c
C_RS05115	10.505	0.0763251	-0.944209	membrane integrity-associated transporter subunit PqiA
C_RS15290	3.60396	0.380501	-0.94381	helix-turn-helix transcriptional regulator
C_RS10290	20.8317	0.0649792	-0.943539	NADH-dependent methylglyoxal reductase
C_RS23235	17.8515	0.199388	-0.942809	acetylornithine deacetylase
C_RS02805	3.32673	0.507034	-0.941818	NfeD family protein
C_RS13005	8.40594	0.48347	-0.940401	cytochrome c-type protein NapC
C_RS11725	5.10891	0.467181	-0.940184	IS3 family transposase
C_RS15895	30.3267	0.0750224	-0.940082	GTP pyrophosphokinase
C_RS11540	33.2574	0.0298992	-0.938878	siderophore yersiniabactin receptor FyuA
C_RS20845	16.1386	0.221046	-0.937812	L-seryl-tRNA(Sec) selenium transferase
C_RS08450	24.0891	0.379154	-0.937679	murein tripeptide ABC transporter substrate-binding protein MppA
C_RS23145	20.0297	0.387206	-0.937485	hypothetical protein
C_RS20230	6.42574	0.513401	-0.936969	GntR family transcriptional regulator
C_RS13845	11.0495	0.155676	-0.936395	AraC family transcriptional regulator
C_RS16125	21.9208	0.423619	-0.936256	type VI secretion protein VasK
C_RS15105	5.18812	0.192963	-0.936202	hypothetical protein
C_RS25020	28.2772	0.0972476	-0.936018	FAD-binding protein
C_RS04300	11.9307	0.211286	-0.934601	fructose-6-phosphate aldolase
C_RS29265	8.11881	0.422112	-0.933557	ShET2/EspL2 family type III secretion system effector toxin
C_RS04415	15.7327	0.138298	-0.932507	tyrosine-type recombinase/integrase
C_RS08695	5.13861	0.4619	-0.932361	50S ribosomal protein L7/L12-serine acetyltransferase
C_RS08415	5.9802	0.392557	-0.931941	thiol peroxidase
C_RS20950	9.09901	0.109003	-0.929995	murein hydrolase activator EnvC
C_RS04515	3.44554	0.42702	-0.929	head completion/stabilization protein
C_RS17605	21.8218	0.18199	-0.928107	fatty acyl-AMP ligase
C_RS20245	19.505	0.113997	-0.927228	PTS galactitol transporter subunit IIC
C_RS11660	96.5347	0.000411258	-0.926872	colibactin hybrid non-ribosomal peptide synthetase/type I polyketide synthase ClbK
C_RS06240	9.62376	0.297162	-0.924807	dihydroorotase
C_RS22030	22.4257	0.432407	-0.923167	ATPase RavA
C_RS04290	33.0099	0.0578437	-0.923063	glycyl radical protein
C_RS22850	16.6931	0.136797	-0.92154	fatty acid biosynthesis protein FabY
C_RS01265	13.4356	0.404731	-0.919329	ATP-binding protein
C_RS06325	13.2871	0.0476482	-0.919189	flagellar basal body L-ring protein FlgH
C_RS06780	17.7723	0.502393	-0.917994	phage terminase large subunit family protein
C_RS02870	19.3168	0.189173	-0.917152	glyoxylate carboligase
C_RS25670	11.1386	0.142932	-0.916544	TRAP transporter substrate-binding protein DctP
C_RS00920	18.0495	0.306157	-0.914765	DNA-binding transcriptional regulator CdaR
C_RS07035	24.396	0.022068	-0.913303	two-component system sensor histidine kinase PhoQ
C_RS28940	15.0693	0.282501	-0.912369	IS3 family transposase
C_RS10840	5.73267	0.411665	-0.912129	copper homeostasis protein CutC
C_RS17180	4.37624	0.549136	-0.912031	IS66 family insertion sequence element accessoryprotein TnpB
C_RS07065	9.52475	0.528032	-0.911509	23S rRNA pseudouridine(2457) synthase RluE
C_RS00070	7.34653	0.341079	-0.910373	acidic protein MsyB
C_RS06530	9.50495	0.440032	-0.909274	N-acetylglucosamine kinase
C_RS22045	17.7921	0.538482	-0.908307	ribose ABC transporter ATP-binding protein RbsA
C_RS04165	1.87129	0.45478	-0.907308	DUF1768 domain-containing protein
C_RS21620	2.33663	0.496299	-0.90666	DUF1198 domain-containing protein
C_RS19680	11.8416	0.419944	-0.906217	phosphoglycolate phosphatase
C_RS29075	2.27723	0.588106	-0.904005	hypothetical protein
C_RS23000	17.198	0.188379	-0.903871	CDF family cation-efflux transporter FieF
C_RS14735	6.31683	0.468386	-0.901115	autonomous glycyl radical cofactor GrcA
C_RS07765	3.84158	0.343007	-0.900993	stress-induced protein YchH
C_RS06250	8.87129	0.328722	-0.899918	glutaredoxin 2
C_RS24545	6.33663	0.506667	-0.899512	hypothetical protein
C_RS08580	12.5644	0.290199	-0.899481	D-lactate dehydrogenase
C_RS24935	5.91089	0.514896	-0.898696	HTH-type transcriptional regulator UlaR
C_RS10355	12.703	0.123987	-0.896337	YeaH/YhbH family protein
C_RS22020	7.84158	0.528287	-0.895684	aspartate--ammonia ligase
C_RS14225	24.5446	0.212402	-0.895088	nitrate/nitrite two-component system sensor histidine kinase NarQ
C_RS03470	15.6733	0.424401	-0.893441	tRNA (N6-isopentenyl adenosine(37)-C2)-methylthiotransferase MiaB
C_RS21190	30.6139	0.324095	-0.892858	alpha-xylosidase
C_RS12990	8.32673	0.533714	-0.892443	heme exporter protein CcmC
C_RS11625	4.48515	0.456113	-0.89198	colibactin self-protection protein ClbS
C_RS19785	2.89109	0.568344	-0.891185	helix-turn-helix domain-containing protein
[truncated: 2,910 more rows]
